# Supplementary material for: Resequencing Elucidates the Genetic Mechanism Underlying Elite Early-Maturing Potato Parent Kexin23
Source: Research Square preprint supplement (doi:10.21203/rs.3.rs-7582259/v1), 2025-12-02
Supplement: Supplementary file 1 [file Supplementary Materials.pdf › Supplementary Materials/Supplementary Materials.pdf]

# **Resequencing Elucidates the Genetic Mechanism Underlying Elite Early-Maturing Potato Parent Kexin23**

**Yue Wang<sup>1,\*</sup>, Yunfei Gao<sup>2</sup>, Qiao Wang<sup>1,2,+</sup>, Bin Yan<sup>1,2,+</sup>, Zhimin Niu<sup>1,2,+</sup>,**

**Xiangri Nan<sup>1,2,+</sup>, Wanmin Sheng<sup>\*</sup> and Qingquan Li<sup>\*</sup>**

<sup>1</sup> Institute of Industrial Crops of Heilongjiang Academy of Agricultural Sciences, Harbin 150086, China

<sup>2</sup> Institute of Industrial Crops of Heilongjiang Academy of Agricultural Sciences/Heilongjiang Key Laboratory for Potato Biology and Quality Improvement, Harbin 150086, China

<sup>\*</sup>corresponding. Wanmin Sheng, E-mail: shengwanmin@163.com

<sup>+</sup>these authors contributed equally to this work

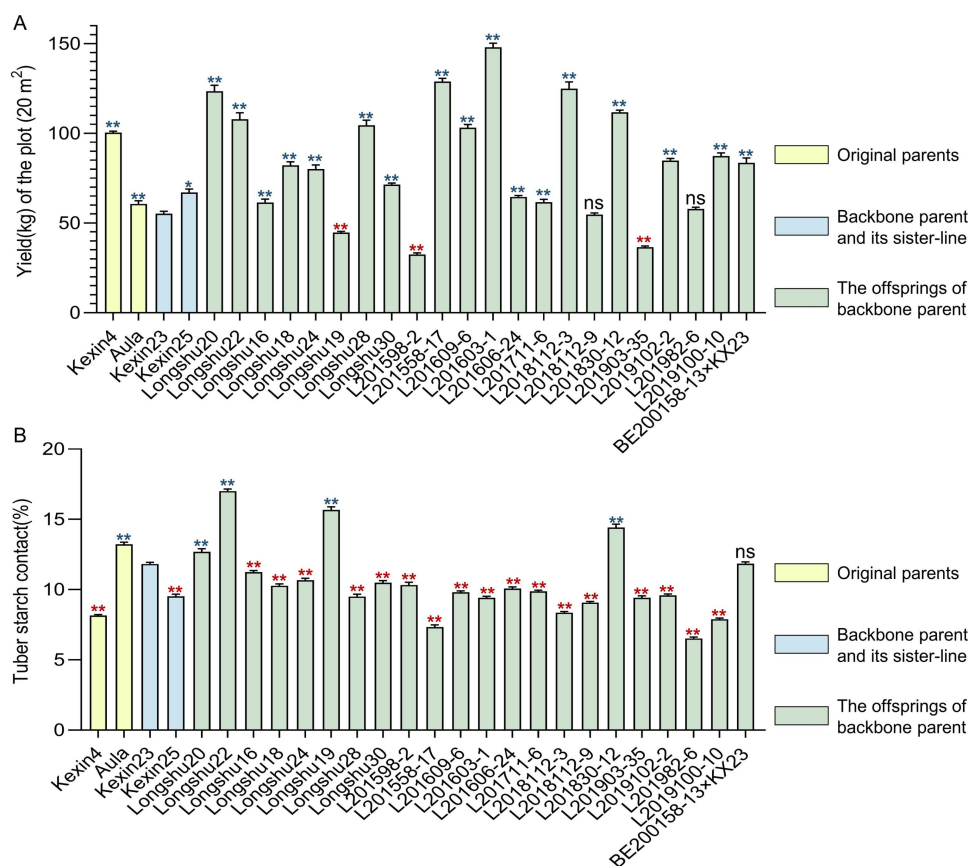

**Figure S1.** Statistical analysis of yield (A) and tuber starch content (B) in Kexin23 and its parents, sister lines, and offsprings.

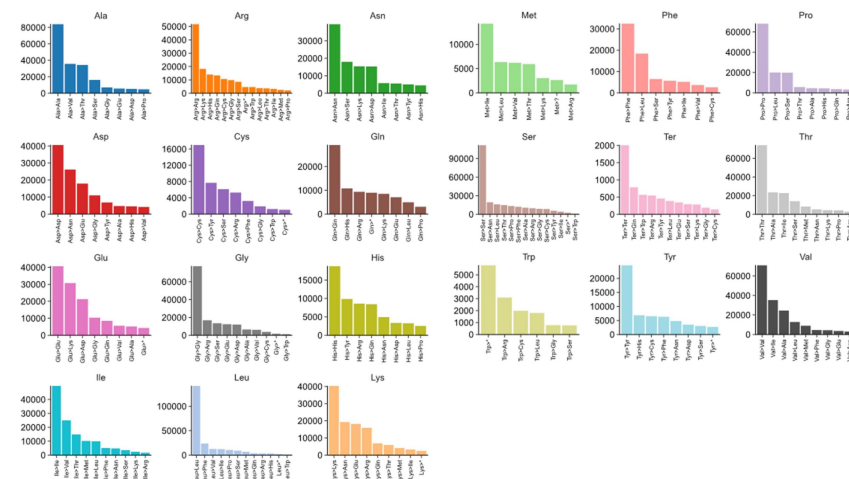

**Figure S2.** Statistics of amino acid substitutions.

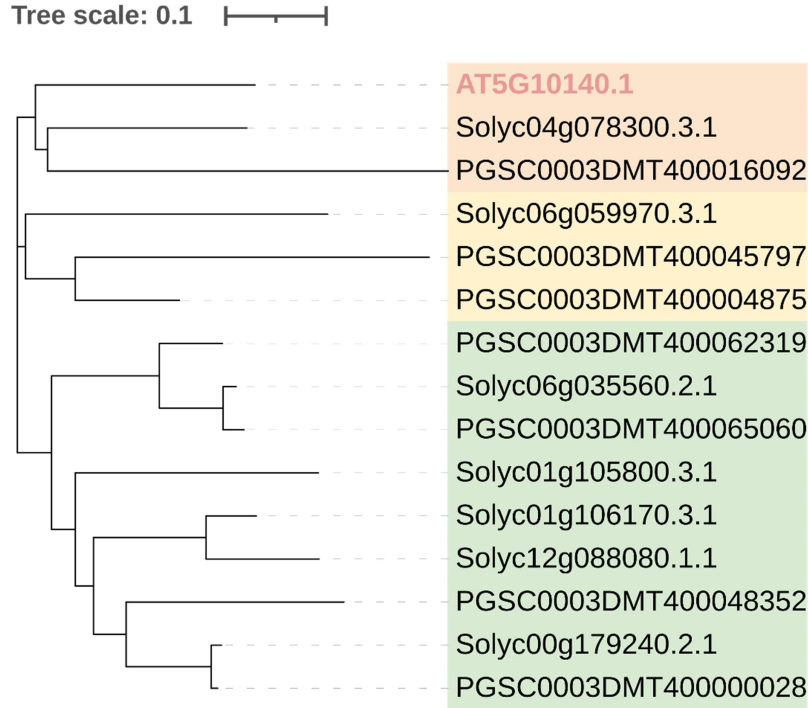

**Figure S3.** Phylogenetic tree of FLC.

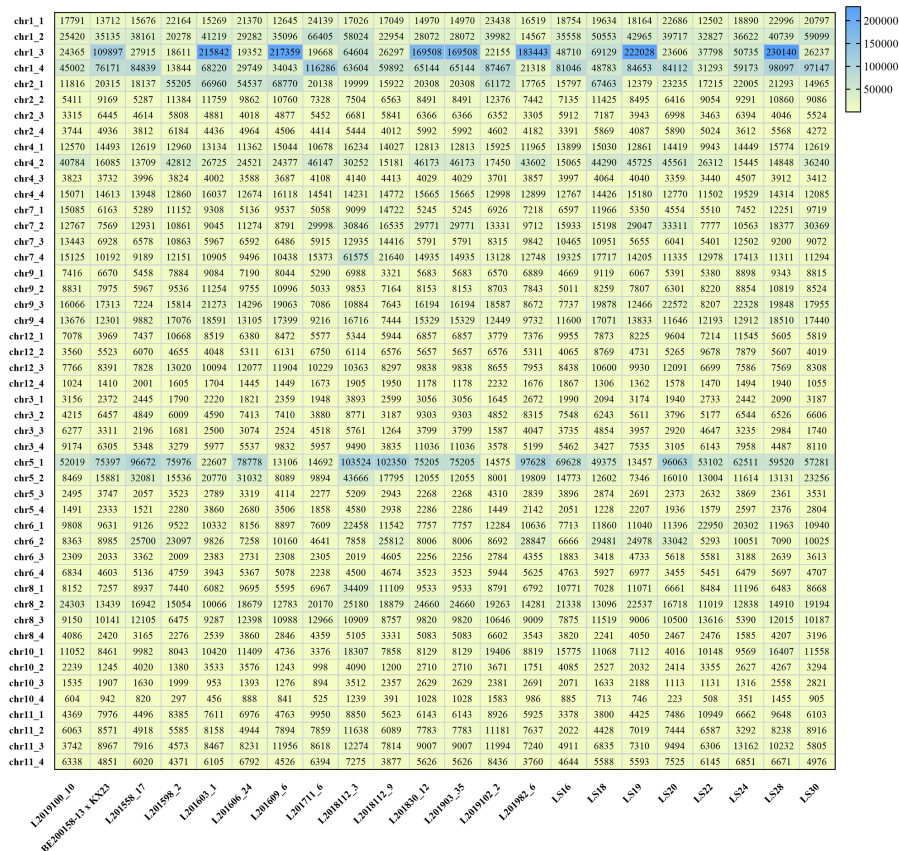

**Figure S4.** Number of SNPs inherited from Kexin23 by the offspring.
