# Supplementary material for: Resequencing Elucidates the Genetic Mechanism Underlying Elite Early-Maturing Potato Parent Kexin23
Source: Research Square preprint supplement (doi:10.21203/rs.3.rs-7582259/v1), 2025-12-02
Supplement: Supplementary file 1 [file Table S1. Average performance and coefficient of variation for maturity, yield, and tuber starch content in the offspring of Kexin23..xls]

## Sheet: Sheet1
Sample	Maturity	Yield	Tuber starch contant
Longshu20	86.5	123.6	12.69
Longshu22	86.5	108	17.01
Longshu16	77	61.57	11.24
Longshu18	79.5	82.2	10.27
Longshu24	91.5	80.25	10.68
Longshu19	75.2	44.73	15.67
Longshu28	77.8	104.7	9.512
Longshu30	78.5	71.53	10.49
L201598-2	82.3	32.48	10.33
L201558-17	95.9	129.1	7.343
L201609-6	80.1	103.3	9.805
L201603-1	96.4	148	9.433
L201606-24	80.8	64.56	10.08
L201711-6	84.2	61.6	9.872
L2018112-3	96.6	125.1	8.356
L2018112-9	96.5	54.74	9.083
L201830-12	86.9	111.7	14.42
L201903-35	91.3	36.63	9.433
L2019102-2	86.6	84.83	9.592
L201982-6	79.4	57.92	6.526
L2019100-10	79.5	87.43	7.889
BE200158-13×KX23	90.7	83.61	11.84
Coefficient of variation	0.08205	0.3752	0.2418
