# Supplementary material for: Resequencing Elucidates the Genetic Mechanism Underlying Elite Early-Maturing Potato Parent Kexin23
Source: Research Square preprint supplement (doi:10.21203/rs.3.rs-7582259/v1), 2025-12-02
Supplement: Supplementary file 3 [file Table S10. The statistics of SNPs variation on chromosomes of Kexin23 or Kexin25 originated from Aula or Kexin4.xls]

## Sheet: Sheet1
Chr.	Aula		KX4
	KX23	KX25	KX23	KX25
chr1_1	14329	13536	10493	14246
chr1_2	12670	7812	14287	23557
chr1_3	62006	43630	7968	15630
chr1_4	13457	9772	7781	12543
chr2_1	2772	12862	38994	8311
chr2_2	19060	20340	7578	9691
chr2_3	6334	5976	1884	1680
chr2_4	8778	8886	2509	3642
chr4_1	10837	13843	18999	21012
chr4_2	5936	13522	45303	31205
chr4_3	8528	9695	4592	4501
chr4_4	12198	15868	17652	15933
chr7_1	8202	7727	4499	5571
chr7_2	13468	5308	6620	9164
chr7_3	11458	7954	6360	10844
chr7_4	9975	7867	5343	12173
chr9_1	3264	2514	1324	2114
chr9_2	5806	4976	2623	3649
chr9_3	7484	8640	4153	8180
chr9_4	16506	11523	5812	8597
chr12_1	8909	9696	6649	8424
chr12_2	4082	3672	3684	2506
chr12_3	9362	11428	8641	6549
chr12_4	3251	3982	981	1040
chr3_1	2065	1453	1033	1129
chr3_2	5773	2271	2606	3230
chr3_3	2502	1228	1917	4027
chr3_4	8397	13429	3181	1387
chr5_1	14469	4697	8859	15873
chr5_2	13366	6784	5686	7677
chr5_3	3544	2432	1357	2368
chr5_4	1818	2091	1459	1167
chr6_1	11783	14277	7537	4567
chr6_2	4191	5267	3522	2854
chr6_3	9991	12923	1385	793
chr6_4	8667	15896	3635	1158
chr8_1	6206	6978	4952	5485
chr8_2	8719	10003	6391	5865
chr8_3	5444	6034	3307	3604
chr8_4	2681	3220	1584	2317
chr10_1	6474	4431	4865	5394
chr10_2	1546	2270	2093	783
chr10_3	1930	2597	1183	1077
chr10_4	1995	2596	955	1164
chr11_1	6394	6995	3681	3567
chr11_2	8563	4856	2099	4398
chr11_3	11901	6507	3449	8488
chr11_4	8948	13118	3999	4821
