# Supplementary material for: Resequencing Elucidates the Genetic Mechanism Underlying Elite Early-Maturing Potato Parent Kexin23
Source: Research Square preprint supplement (doi:10.21203/rs.3.rs-7582259/v1), 2025-12-02
Supplement: Supplementary file 5 [file Table S11. The statistics of genetic contribution of Aula or Kexin 4 to Kexin 23 or Kexin25 .xls]

## Sheet: Sheet1
Chr.	Genetic Contribution(%)
	Aula		KX4
	KX23	KX25	KX23	KX25
chr1_1	63.83	71.36	61.41	60.66
chr1_2	52.85	54.59	45.88	68.81
chr1_3	62.33	58.31	47.46	56.92
chr1_4	53.19	55.52	47.94	62.77
chr2_1	52.97	67.12	61.21	48.6
chr2_2	51.63	67.28	53.18	51.95
chr2_3	69.78	59.9	67.52	58.28
chr2_4	61.43	61.77	67.06	60.55
chr3_1	62.39	73.99	56.24	76.02
chr3_2	55.06	63.48	41.02	82.4
chr3_3	55.87	66.64	45.94	68.1
chr3_4	58.21	66.04	46.98	70.45
chr4_1	52.48	53.09	74.03	72.92
chr4_2	55.97	61.76	80.65	75.43
chr4_3	53.48	62.25	65.12	59.64
chr4_4	56.12	55.11	72.48	65.57
chr5_1	63.4	49.99	51.26	57.84
chr5_2	56.85	47.49	42.11	74.97
chr5_3	68	67.47	68.3	75.75
chr5_4	64.67	67.44	63.08	72.5
chr6_1	68.15	61.43	58.51	45.84
chr6_2	71.85	61.38	56.61	46.31
chr6_3	58.72	61.41	46.81	45.08
chr6_4	68.51	58.15	59.36	42.35
chr7_1	65.42	63.23	50.23	77.63
chr7_2	56.59	65.84	46.25	67.07
chr7_3	59.21	65.83	51.61	62.97
chr7_4	53.83	63.99	39.6	70.06
chr8_1	62	65.02	51.17	57.54
chr8_2	57.91	67.44	47.84	57.16
chr8_3	67.31	59.44	60.22	55.56
chr8_4	61.82	71.08	57.29	75.16
chr9_1	57.59	67.42	50.74	68.29
chr9_2	64.22	67.99	51.88	68.45
chr9_3	58.52	62.4	48.88	66.05
chr9_4	62.83	60.56	47.71	62.72
chr10_1	65.88	45.48	64.92	44.51
chr10_2	53.27	65.94	53.69	57.6
chr10_3	53.75	58.13	71.72	58.44
chr10_4	62.71	65.62	56.53	57.19
chr11_1	68.22	73.63	63.74	62.62
chr11_2	63.1	66.95	49.24	62.45
chr11_3	55.56	55.7	30.29	78.18
chr11_4	57.33	64.43	51.26	62.71
chr12_1	56.52	53.06	59.15	60.8
chr12_2	68.55	66.66	66.46	66.32
chr12_3	67.57	67.6	66.3	64.05
chr12_4	64.37	72.3	57.86	57.36
