# Supplementary material for: Resequencing Elucidates the Genetic Mechanism Underlying Elite Early-Maturing Potato Parent Kexin23
Source: Research Square preprint supplement (doi:10.21203/rs.3.rs-7582259/v1), 2025-12-02
Supplement: Supplementary file 7 [file Table S12. The statistics of specific variants in Kexin 23 or Kexin25 .xls]

## Sheet: Sheet1
Chr.	Number of specific variants
	KX23	KX25
chr1_1	310	265
chr1_2	237	115
chr1_3	219	282
chr1_4	174	73
chr2_1	26	219
chr2_2	182	135
chr2_3	19	31
chr2_4	67	55
chr3_1	223	262
chr3_2	100	328
chr3_3	88	97
chr3_4	214	217
chr4_1	67	61
chr4_2	195	100
chr4_3	127	136
chr4_4	92	104
chr5_1	30	22
chr5_2	48	65
chr5_3	111	115
chr5_4	105	111
chr6_1	223	138
chr6_2	97	39
chr6_3	164	105
chr6_4	24	15
chr7_1	18	9
chr7_2	43	34
chr7_3	33	11
chr7_4	44	13
chr8_1	336	127
chr8_2	142	65
chr8_3	47	28
chr8_4	30	24
chr9_1	202	91
chr9_2	35	17
chr9_3	45	22
chr9_4	67	18
chr10_1	134	110
chr10_2	170	99
chr10_3	87	62
chr10_4	41	45
chr11_1	124	79
chr11_2	29	14
chr11_3	19	6
chr11_4	17	12
chr12_1	104	55
chr12_2	33	84
chr12_3	85	64
chr12_4	120	54
