# Supplementary material for: Resequencing Elucidates the Genetic Mechanism Underlying Elite Early-Maturing Potato Parent Kexin23
Source: Research Square preprint supplement (doi:10.21203/rs.3.rs-7582259/v1), 2025-12-02
Supplement: Supplementary file 9 [file Table S13. Functional annotation of genes harboring specific variants in coding sequences (CDS) of Kexin23 .xls]

## Sheet: Sheet1
Chr.	POS	REF	ALT	KX23:GT	SNPEFF_EFFECT	SNPEFF_GENE_NAME	SNPEFF_CODON_CHANGE	SNPEFF_AMINO_ACID_CHANGE	Swissprot
chr1_1	33477392	C	A	A/A	missense_variant	C88_C01H1G013560	c.288G>T	p.Met96Ile	Q91DM0.1 RecName: Full=Genome polyprotein; Includes: RecName: Full=Aspartic protease; Short=PR; Includes: RecName: Full=Reverse transcriptase; Short=RT [Petunia vein clearing virus isolate Shepherd]
chr1_3	4891741	A	T	T/T	missense_variant	C88_C01H3G099040	c.1160T>A	p.Ile387Lys	O49879.2 RecName: Full=Receptor-like protein Cf-9 homolog; Flags: Precursor [Solanum lycopersicum]
chr1_3	17704091	C	T	T/T	missense_variant	C88_C01H3G105530	c.503C>T	p.Ala168Val	NA
chr1_3	55011606	G	T	T/T	missense_variant	C88_C01H3G113240	c.124G>T	p.Gly42Cys	NA
chr1_3	63639300	C	T	T/T	missense_variant	C88_C01H3G118580	c.439G>A	p.Ala147Thr	NA
chr1_3	63639310	A	G	G/G	synonymous_variant	C88_C01H3G118580	c.429T>C	p.Ser143Ser	NA
chr1_3	63639340	T	C	C/C	synonymous_variant	C88_C01H3G118580	c.399A>G	p.Lys133Lys	NA
chr1_3	80079380	T	C	C/C	synonymous_variant	C88_C01H3G135300	c.513A>G	p.Ser171Ser	NA
chr1_3	80079380	T	C	C/C	synonymous_variant	C88_C01H3G135300	c.93A>G	p.Ser31Ser	NA
chr1_3	80682040	G	T	T/T	stop_gained	C88_C01H3G136010	c.97G>T	p.Glu33*	NA
chr1_3	83974152	G	A	A/A	synonymous_variant	C88_C01H3G139550	c.36C>T	p.His12His	NA
chr1_4	4338899	C	G	G/G	missense_variant	C88_C01H4G145120	c.290G>C	p.Ser97Thr	Q40235.1 RecName: Full=Receptor-like protein Cf-9; Flags: Precursor [Solanum pimpinellifolium]
chr2_2	19047373	T	A	A/A	missense_variant	C88_C02H2G037550	c.49T>A	p.Tyr17Asn	NA
chr2_2	21725748	T	G	G/G	missense_variant	C88_C02H2G039090	c.1355A>C	p.Asp452Ala	NA
chr2_4	16849640	T	G	G/G	missense_variant&splice_region_variant	C88_C02H4G101340	c.375A>C	p.Gln125His	P51615.1 RecName: Full=NADP-dependent malic enzyme; Short=NADP-ME [Vitis vinifera]
chr2_4	19027169	C	A	A/A	missense_variant	C88_C02H4G102240	c.158G>T	p.Arg53Met	NA
chr4_1	3698479	T	A	A/A	missense_variant	C88_C04H1G003050	c.40T>A	p.Cys14Ser	Q6L400.1 RecName: Full=Putative late blight resistance protein homolog R1B-16 [Solanum demissum]
chr4_1	3698479	T	A	A/A	missense_variant	C88_C04H1G003050	c.40T>A	p.Cys14Ser	Q6L400.1 RecName: Full=Putative late blight resistance protein homolog R1B-16 [Solanum demissum]
chr4_1	3698479	T	A	A/A	missense_variant	C88_C04H1G003050	c.40T>A	p.Cys14Ser	Q6L400.1 RecName: Full=Putative late blight resistance protein homolog R1B-16 [Solanum demissum]
chr4_1	8550807	C	T	T/T	synonymous_variant	C88_C04H1G007550	c.2253G>A	p.Leu751Leu	A1D144.1 RecName: Full=Probable rhamnogalacturonate lyase B; Flags: Precursor [Aspergillus fischeri NRRL 181]
chr4_2	77940633	T	A	A/A	synonymous_variant	C88_C04H2G069650	c.1431T>A	p.Ala477Ala	F4I3Z5.1 RecName: Full=Tetratricopeptide repeat protein SKI3; AltName: Full=Protein SKI3 homolog; Short=AtSKI3 [Arabidopsis thaliana]
chr4_2	77940633	T	A	A/A	synonymous_variant	C88_C04H2G069650	c.900T>A	p.Ala300Ala	F4I3Z5.1 RecName: Full=Tetratricopeptide repeat protein SKI3; AltName: Full=Protein SKI3 homolog; Short=AtSKI3 [Arabidopsis thaliana]
chr4_2	77940633	T	A	A/A	synonymous_variant	C88_C04H2G069650	c.1431T>A	p.Ala477Ala	F4I3Z5.1 RecName: Full=Tetratricopeptide repeat protein SKI3; AltName: Full=Protein SKI3 homolog; Short=AtSKI3 [Arabidopsis thaliana]
chr4_2	77940633	T	A	A/A	synonymous_variant	C88_C04H2G069650	c.888T>A	p.Ala296Ala	F4I3Z5.1 RecName: Full=Tetratricopeptide repeat protein SKI3; AltName: Full=Protein SKI3 homolog; Short=AtSKI3 [Arabidopsis thaliana]
chr4_2	77940633	T	A	A/A	synonymous_variant	C88_C04H2G069650	c.1419T>A	p.Ala473Ala	F4I3Z5.1 RecName: Full=Tetratricopeptide repeat protein SKI3; AltName: Full=Protein SKI3 homolog; Short=AtSKI3 [Arabidopsis thaliana]
chr4_2	77940633	T	A	A/A	synonymous_variant	C88_C04H2G069650	c.900T>A	p.Ala300Ala	F4I3Z5.1 RecName: Full=Tetratricopeptide repeat protein SKI3; AltName: Full=Protein SKI3 homolog; Short=AtSKI3 [Arabidopsis thaliana]
chr4_3	9408177	A	C	C/C	missense_variant	C88_C04H3G077750	c.663T>G	p.Ile221Met	NA
chr4_4	11145161	C	A	A/A	synonymous_variant	C88_C04H4G109540	c.1188C>A	p.Ala396Ala	F4J2M6.2 RecName: Full=Kinesin-like protein KIN-14L [Arabidopsis thaliana]
chr4_4	11147890	C	T	T/T	missense_variant	C88_C04H4G109540	c.2999C>T	p.Thr1000Ile	F4J2M6.2 RecName: Full=Kinesin-like protein KIN-14L [Arabidopsis thaliana]
chr4_4	32476363	G	A	A/A	missense_variant	C88_C04H4G113850	c.323G>A	p.Arg108His	NA
chr4_4	56801215	T	G	G/G	missense_variant	C88_C04H4G122580	c.506T>G	p.Leu169Arg	Q9LZM3.2 RecName: Full=Phosphopantothenate--cysteine ligase 2; AltName: Full=Phosphopantothenoylcysteine synthetase 2; Short=PPC synthetase 2 [Arabidopsis thaliana]
chr4_4	64374618	C	A	A/A	synonymous_variant	C88_C04H4G128390	c.405G>T	p.Thr135Thr	Q8VZU3.1 RecName: Full=Serine carboxypeptidase-like 19; AltName: Full=Protein SINAPOYLGLUCOSE ACCUMULATOR 2; AltName: Full=Sinapoylglucose--choline O-sinapoyltransferase; Short=SCT; Contains: RecName: Full=Serine carboxypeptidase-like 19 chain A; Contains: RecName: Full=Serine carboxypeptidase-like 19 chain B; Flags: Precursor [Arabidopsis thaliana]
chr4_4	64374618	C	A	A/A	synonymous_variant	C88_C04H4G128390	c.78G>T	p.Thr26Thr	Q8VZU3.1 RecName: Full=Serine carboxypeptidase-like 19; AltName: Full=Protein SINAPOYLGLUCOSE ACCUMULATOR 2; AltName: Full=Sinapoylglucose--choline O-sinapoyltransferase; Short=SCT; Contains: RecName: Full=Serine carboxypeptidase-like 19 chain A; Contains: RecName: Full=Serine carboxypeptidase-like 19 chain B; Flags: Precursor [Arabidopsis thaliana]
chr4_4	64955608	G	C	C/C	synonymous_variant	C88_C04H4G129100	c.981G>C	p.Thr327Thr	O49858.1 RecName: Full=Cytochrome P450 82A3; AltName: Full=Cytochrome P450 CP6 [Glycine max]
chr7_1	48491923	G	A	A/A	missense_variant	C88_C07H1G016450	c.1781C>T	p.Thr594Ile	NA
chr7_3	7434854	C	T	T/T	missense_variant	C88_C07H3G059110	c.1376G>A	p.Ser459Asn	Q9ZR08.3 RecName: Full=G-type lectin S-receptor-like serine/threonine-protein kinase At4g03230; Flags: Precursor [Arabidopsis thaliana]
chr7_3	47933799	A	C	C/C	missense_variant	C88_C07H3G074530	c.3171T>G	p.Ile1057Met	Q9LVY1.1 RecName: Full=Tyrosine aminotransferase; Short=TAT; AltName: Full=L-tyrosine:2-oxoglutarate aminotransferase [Arabidopsis thaliana]
chr7_3	48191366	T	A	A/A	missense_variant	C88_C07H3G074840	c.130A>T	p.Asn44Tyr	NA
chr7_3	50617366	T	G	G/G	synonymous_variant	C88_C07H3G077200	c.285A>C	p.Thr95Thr	O81832.4 RecName: Full=G-type lectin S-receptor-like serine/threonine-protein kinase At4g27290; Flags: Precursor [Arabidopsis thaliana]
chr7_4	29028456	G	A	A/A	missense_variant	C88_C07H4G090400	c.3068G>A	p.Gly1023Asp	P92555.1 RecName: Full=Uncharacterized mitochondrial protein AtMg01250; AltName: Full=ORF102 [Arabidopsis thaliana]
chr7_4	31472158	C	T	T/T	synonymous_variant	C88_C07H4G091120	c.552G>A	p.Arg184Arg	Q38953.2 RecName: Full=Probable pre-mRNA-splicing factor ATP-dependent RNA helicase DEAH5; AltName: Full=DEAH RNA helicase homolog PRP22 [Arabidopsis thaliana]
chr9_4	60053735	A	G	G/G	synonymous_variant	C88_C09H4G106760	c.771A>G	p.Lys257Lys	NA
chr9_4	60053745	G	A	A/A	missense_variant	C88_C09H4G106760	c.781G>A	p.Val261Ile	NA
chr9_4	63881408	T	C	C/C	missense_variant	C88_C09H4G109200	c.305T>C	p.Met102Thr	NA
chr9_4	71938277	T	A	A/A	missense_variant	C88_C09H4G116310	c.5578A>T	p.Thr1860Ser	A0A290U7C4.1 RecName: Full=Disease resistance protein Roq1; AltName: Full=2' cyclic ADP-D-ribose synthase; Short=2'cADPR synthase Roq1; AltName: Full=NAD(+) hydrolase RPV1; AltName: Full=Recognition of XopQ 1 protein [Nicotiana benthamiana]
chr12_1	1507878	A	T	T/T	synonymous_variant	C88_C12H1G001930	c.1776A>T	p.Pro592Pro	Q3UHB1.1 RecName: Full=5'-nucleotidase domain-containing protein 3; AltName: Full=GRP94-neighboring nucleotidase [Mus musculus]
chr12_1	1507878	A	T	T/T	synonymous_variant	C88_C12H1G001930	c.1443A>T	p.Pro481Pro	Q3UHB1.1 RecName: Full=5'-nucleotidase domain-containing protein 3; AltName: Full=GRP94-neighboring nucleotidase [Mus musculus]
chr12_1	10680509	C	T	T/T	synonymous_variant	C88_C12H1G010230	c.2778C>T	p.Leu926Leu	Q8L7A0.1 RecName: Full=Sulfite exporter TauE/SafE family protein 3 [Arabidopsis thaliana]
chr12_1	31190829	T	A	A/A	stop_gained	C88_C12H1G014800	c.166A>T	p.Lys56*	Q9LIH5.1 RecName: Full=Zinc finger CCCH domain-containing protein 38; Short=AtC3H38 [Arabidopsis thaliana]
chr12_1	65209335	G	T	T/T	missense_variant	C88_C12H1G026970	c.1828G>T	p.Ala610Ser	Q6L3Z4.2 RecName: Full=Putative late blight resistance protein homolog R1B-12 [Solanum demissum]
chr12_1	65209335	G	T	T/T	missense_variant	C88_C12H1G026970	c.1828G>T	p.Ala610Ser	Q6L3Z4.2 RecName: Full=Putative late blight resistance protein homolog R1B-12 [Solanum demissum]
chr12_1	65209343	T	A	A/A	stop_gained	C88_C12H1G026970	c.1836T>A	p.Tyr612*	Q6L3Z4.2 RecName: Full=Putative late blight resistance protein homolog R1B-12 [Solanum demissum]
chr12_1	65209343	T	A	A/A	stop_gained	C88_C12H1G026970	c.1836T>A	p.Tyr612*	Q6L3Z4.2 RecName: Full=Putative late blight resistance protein homolog R1B-12 [Solanum demissum]
chr12_2	62247442	T	C	C/C	missense_variant	C88_C12H2G052840	c.3574A>G	p.Ser1192Gly	Q9SD62.1 RecName: Full=Putative receptor-like protein kinase At3g47110; Flags: Precursor [Arabidopsis thaliana]
chr12_3	6348030	G	T	T/T	synonymous_variant	C88_C12H3G063740	c.498G>T	p.Ala166Ala	NA
chr12_3	6348030	G	T	T/T	synonymous_variant	C88_C12H3G063740	c.423G>T	p.Ala141Ala	NA
chr12_3	11023217	C	T	T/T	synonymous_variant	C88_C12H3G067090	c.195C>T	p.Ala65Ala	Q589Y0.1 RecName: Full=Phenolic glucoside malonyltransferase 1; Short=NtMaT1; AltName: Full=Flavonol/naphthol glucoside malonyltransferase 1; AltName: Full=Phenolic glucoside-6'-O-malonyltransferase 1 [Nicotiana tabacum]
chr12_3	62283926	A	C	C/C	missense_variant	C88_C12H3G078560	c.1324A>C	p.Asn442His	Q6JN46.2 RecName: Full=Receptor-like protein EIX2; AltName: Full=EIX receptor 2; Flags: Precursor [Solanum lycopersicum]
chr12_3	66264628	G	A	A/A	missense_variant	C88_C12H3G082130	c.1496G>A	p.Cys499Tyr	Q60CZ8.1 RecName: Full=Putative late blight resistance protein homolog R1A-10 [Solanum demissum]
chr12_3	66356026	T	C	C/C	missense_variant	C88_C12H3G082240	c.797A>G	p.Asp266Gly	Q9C637.1 RecName: Full=Receptor-like protein 6; Short=AtRLP6; Flags: Precursor [Arabidopsis thaliana]
chr12_3	66807063	C	G	G/G	missense_variant	C88_C12H3G082570	c.946C>G	p.His316Asp	Q9C637.1 RecName: Full=Receptor-like protein 6; Short=AtRLP6; Flags: Precursor [Arabidopsis thaliana]
chr12_4	10523773	G	T	T/T	synonymous_variant	C88_C12H4G094280	c.1125C>A	p.Val375Val	NA
chr3_2	47741860	G	A	A/A	synonymous_variant	C88_C03H2G051690	c.516G>A	p.Pro172Pro	Q9SMU4.1 RecName: Full=UPF0496 protein At3g49070 [Arabidopsis thaliana]
chr3_4	3913544	A	G	G/G	synonymous_variant	C88_C03H4G109300	c.2118T>C	p.Val706Val	O23225.3 RecName: Full=U-box domain-containing protein 5; AltName: Full=Plant U-box protein 5; AltName: Full=RING-type E3 ubiquitin transferase PUB5 [Arabidopsis thaliana]
chr3_4	53955845	T	A	A/A	missense_variant	C88_C03H4G128950	c.985T>A	p.Leu329Ile	Q9SUE7.3 RecName: Full=Histone-lysine N-methyltransferase ATX4; AltName: Full=Protein SET DOMAIN GROUP 16; AltName: Full=Trithorax-homolog protein 4; Short=TRX-homolog protein 4; Short=Trithorax 4 [Arabidopsis thaliana]
chr5_2	46025104	G	C	C/C	missense_variant	C88_C05H2G045910	c.794G>C	p.Arg265Thr	Q8H0Y8.2 RecName: Full=Probable WRKY transcription factor 41; AltName: Full=WRKY DNA-binding protein 41 [Arabidopsis thaliana]
chr5_2	46268829	C	G	G/G	missense_variant	C88_C05H2G046040	c.644C>G	p.Thr215Arg	NA
chr6_1	4548122	C	A	A/A	missense_variant	C88_C06H1G003440	c.198C>A	p.Asp66Glu	Q9ZW33.1 RecName: Full=Mitochondrial import inner membrane translocase subunit TIM10 [Arabidopsis thaliana]
chr6_1	6852236	G	A	A/A	synonymous_variant	C88_C06H1G004570	c.93G>A	p.Leu31Leu	NA
chr6_3	47608924	C	T	T/T	missense_variant	C88_C06H3G086310	c.866G>A	p.Arg289Lys	Q6L400.1 RecName: Full=Putative late blight resistance protein homolog R1B-16 [Solanum demissum]
chr6_3	47609259	G	T	T/T	synonymous_variant	C88_C06H3G086310	c.607C>A	p.Arg203Arg	Q6L400.1 RecName: Full=Putative late blight resistance protein homolog R1B-16 [Solanum demissum]
chr6_3	47651261	G	A	A/A	synonymous_variant	C88_C06H3G086330	c.15C>T	p.Gly5Gly	Q6L3Z4.2 RecName: Full=Putative late blight resistance protein homolog R1B-12 [Solanum demissum]
chr6_3	49345025	A	T	T/T	missense_variant	C88_C06H3G088120	c.3616T>A	p.Ser1206Thr	Q9SLK6.2 RecName: Full=Phospholipid-transporting ATPase 6; Short=AtALA6; AltName: Full=Aminophospholipid flippase 6 [Arabidopsis thaliana]
chr6_3	49345025	A	T	T/T	missense_variant	C88_C06H3G088120	c.3583T>A	p.Ser1195Thr	Q9SLK6.2 RecName: Full=Phospholipid-transporting ATPase 6; Short=AtALA6; AltName: Full=Aminophospholipid flippase 6 [Arabidopsis thaliana]
chr6_4	4993849	T	A	A/A	synonymous_variant	C88_C06H4G103160	c.1164A>T	p.Ser388Ser	C0LGP4.1 RecName: Full=Probable LRR receptor-like serine/threonine-protein kinase At3g47570; Flags: Precursor [Arabidopsis thaliana]
chr8_1	8891076	A	C	C/C	missense_variant	C88_C08H1G005970	c.484T>G	p.Ser162Ala	NA
chr8_2	9551233	A	G	G/G	missense_variant	C88_C08H2G032030	c.706A>G	p.Ile236Val	NA
chr8_2	18342332	G	A	A/A	missense_variant	C88_C08H2G033240	c.988G>A	p.Gly330Ser	NA
chr8_2	18342332	G	A	A/A	missense_variant	C88_C08H2G033240	c.988G>A	p.Gly330Ser	NA
chr8_2	18342332	G	A	A/A	missense_variant	C88_C08H2G033240	c.988G>A	p.Gly330Ser	NA
chr8_2	18342332	G	A	A/A	missense_variant	C88_C08H2G033240	c.988G>A	p.Gly330Ser	NA
chr8_3	49994225	C	A	A/A	missense_variant	C88_C08H3G069630	c.1351G>T	p.Asp451Tyr	C0LGP4.1 RecName: Full=Probable LRR receptor-like serine/threonine-protein kinase At3g47570; Flags: Precursor [Arabidopsis thaliana]
chr10_2	47300923	A	T	T/T	missense_variant	C88_C10H2G045280	c.369T>A	p.Phe123Leu	NA
chr11_1	445383	G	C	C/C	missense_variant	C88_C11H1G000440	c.362G>C	p.Ser121Thr	NA
chr11_1	2247640	G	A	A/A	synonymous_variant	C88_C11H1G002170	c.483G>A	p.Ala161Ala	Q40392.1 RecName: Full=TMV resistance protein N [Nicotiana glutinosa]
chr11_1	2247640	G	A	A/A	synonymous_variant	C88_C11H1G002170	c.483G>A	p.Ala161Ala	Q40392.1 RecName: Full=TMV resistance protein N [Nicotiana glutinosa]
chr11_1	3358286	T	A	A/A	missense_variant	C88_C11H1G002810	c.3218T>A	p.Val1073Glu	Q40392.1 RecName: Full=TMV resistance protein N [Nicotiana glutinosa]
chr11_1	3358286	T	A	A/A	missense_variant	C88_C11H1G002810	c.3158T>A	p.Val1053Glu	Q40392.1 RecName: Full=TMV resistance protein N [Nicotiana glutinosa]
chr11_1	35840938	A	C	C/C	missense_variant	C88_C11H1G017200	c.253T>G	p.Phe85Val	Q84TH9.2 RecName: Full=Protein NLP7; Short=AtNLP7; AltName: Full=NIN-like protein 7; AltName: Full=Nodule inception protein-like protein 7 [Arabidopsis thaliana]
chr11_1	44942088	C	T	T/T	missense_variant	C88_C11H1G023740	c.2899G>A	p.Glu967Lys	Q9LRR4.1 RecName: Full=Putative disease resistance RPP13-like protein 1 [Arabidopsis thaliana]
chr11_1	44942088	C	T	T/T	missense_variant	C88_C11H1G023740	c.2899G>A	p.Glu967Lys	Q9LRR4.1 RecName: Full=Putative disease resistance RPP13-like protein 1 [Arabidopsis thaliana]
chr11_2	3117397	G	T	T/T	missense_variant	C88_C11H2G028460	c.339C>A	p.Asn113Lys	NA
chr11_2	44834488	C	G	G/G	missense_variant	C88_C11H2G047860	c.1705C>G	p.Gln569Glu	Q9LRR4.1 RecName: Full=Putative disease resistance RPP13-like protein 1 [Arabidopsis thaliana]
chr11_2	44834488	C	G	G/G	missense_variant	C88_C11H2G047860	c.1705C>G	p.Gln569Glu	Q9LRR4.1 RecName: Full=Putative disease resistance RPP13-like protein 1 [Arabidopsis thaliana]
chr11_2	44834488	C	G	G/G	missense_variant	C88_C11H2G047860	c.1594C>G	p.Gln532Glu	Q9LRR4.1 RecName: Full=Putative disease resistance RPP13-like protein 1 [Arabidopsis thaliana]
chr11_3	37581958	C	T	T/T	missense_variant	C88_C11H3G067970	c.2068G>A	p.Glu690Lys	Q10S83.1 RecName: Full=Protein NLP1; Short=OsNLP1; AltName: Full=NIN-like protein 1; AltName: Full=Nodule inception protein-like protein 1 [Oryza sativa Japonica Group]
chr11_3	37581958	C	T	T/T	missense_variant	C88_C11H3G067970	c.1864G>A	p.Glu622Lys	Q10S83.1 RecName: Full=Protein NLP1; Short=OsNLP1; AltName: Full=NIN-like protein 1; AltName: Full=Nodule inception protein-like protein 1 [Oryza sativa Japonica Group]
chr11_3	37581958	C	T	T/T	missense_variant	C88_C11H3G067970	c.1864G>A	p.Glu622Lys	Q10S83.1 RecName: Full=Protein NLP1; Short=OsNLP1; AltName: Full=NIN-like protein 1; AltName: Full=Nodule inception protein-like protein 1 [Oryza sativa Japonica Group]
chr11_3	37581958	C	T	T/T	missense_variant	C88_C11H3G067970	c.1876G>A	p.Glu626Lys	Q10S83.1 RecName: Full=Protein NLP1; Short=OsNLP1; AltName: Full=NIN-like protein 1; AltName: Full=Nodule inception protein-like protein 1 [Oryza sativa Japonica Group]
chr11_3	37581958	C	T	T/T	missense_variant	C88_C11H3G067970	c.1927G>A	p.Glu643Lys	Q10S83.1 RecName: Full=Protein NLP1; Short=OsNLP1; AltName: Full=NIN-like protein 1; AltName: Full=Nodule inception protein-like protein 1 [Oryza sativa Japonica Group]
chr11_3	37581958	C	T	T/T	missense_variant	C88_C11H3G067970	c.1864G>A	p.Glu622Lys	Q10S83.1 RecName: Full=Protein NLP1; Short=OsNLP1; AltName: Full=NIN-like protein 1; AltName: Full=Nodule inception protein-like protein 1 [Oryza sativa Japonica Group]
chr11_4	40223986	T	G	G/G	missense_variant	C88_C11H4G096280	c.3838T>G	p.Phe1280Val	Q9LRR4.1 RecName: Full=Putative disease resistance RPP13-like protein 1 [Arabidopsis thaliana]
chr11_4	40223986	T	G	G/G	missense_variant	C88_C11H4G096280	c.3838T>G	p.Phe1280Val	Q9LRR4.1 RecName: Full=Putative disease resistance RPP13-like protein 1 [Arabidopsis thaliana]
chr11_4	40223987	T	A	A/A	missense_variant	C88_C11H4G096280	c.3839T>A	p.Phe1280Tyr	Q9LRR4.1 RecName: Full=Putative disease resistance RPP13-like protein 1 [Arabidopsis thaliana]
chr11_4	40223987	T	A	A/A	missense_variant	C88_C11H4G096280	c.3839T>A	p.Phe1280Tyr	Q9LRR4.1 RecName: Full=Putative disease resistance RPP13-like protein 1 [Arabidopsis thaliana]
chr11_4	41975473	T	G	G/G	missense_variant	C88_C11H4G098140	c.101A>C	p.Asn34Thr	NA
