# Supplementary material for: Resequencing Elucidates the Genetic Mechanism Underlying Elite Early-Maturing Potato Parent Kexin23
Source: Research Square preprint supplement (doi:10.21203/rs.3.rs-7582259/v1), 2025-12-02
Supplement: Supplementary file 11 [file Table S14. CDS sequences of nonsense variants genes in Kexin23 with orthogonal variant characterization in Kexin4, Aula, and Kexin25 .xls]

## Sheet: Sheet1
Chr.	POS	KX23	KX25	KX4	Aula	REF-CDS
chr12_1	31190829	T/T	G/G	G/G	A/A	TTAAATCAGGGACAAACAGAATTCACCCGGACAAACAGGCTTCTTATGCCTCACCTCAACGATGTTAGTAAGATTTGGGAGAGATAAATCAATATACTCTTCGGCTGATTCAGCCGTATTAGGAATCTGATTTGGATGCAAAGAGTTTTTAACTTTATCAACAGTCTTGTTTACTACCTTCTTGTAAGCATCCTTACTTATAAGTCCTTCATTCCAAGTTGGCCTTAATAGTTCTTTAACAAATTCCACAAGAGCAACATGAAAATTCTTCAAAACGGTTGACTCTGTGTTCACACATTTGTTGTCAATATCAATTTCATTTCCAGATGAGAACCTCTCAGATTCTAAATTCTGAGAGGTATTCATGTTTTCTTGATGATAAACTGCTGTATCATCACT…
chr12_1	65209335	A/A	G/G	G/G	*/*	GCTGGAAATGTGATGGAAATAGCTAGTAAAAGAAAGAACTTTGCATTTTCTGTTTTCTTAAAAACTGAAAAATTACATAACTTGTGGCAATTTGTTCATTTTCATACTGAGAGATATTTCTAATTTTTGGATATATGGCTTATGCTGCTGTTACTTCCCTTATGAGAACCATACATCAATCAATGGAACTTACTGGATGTGATTTGCAACCGTTTTATGAAAAGCTCAAATCTTTGAGAGCTATTCTGGAGAAATCCTGCAATATAATGGGCGATCATGAGGGGTTAACAATCTTGGAAGTTGAAATCGTAGAGGTAGCATACACAACAGAAGATATGGTTGACTCGGAATCAAGAAATGTTTTTTTAGCACAAAATTTGGAGGAAAGAAGCAGGGCTA…
chr1_3	80682040	T/T	G/A	G/G	A/A	GTTAGATGATCCAACATGTGATAAAAATGTCAATTGCATAATCTGCTTGATTGTTGGATAGATATTTACACAATTGTGTTTCCAATTAGAGTAAAAACATGATGCACACAAGGTGTTTGATAAAATTCCTCAATGGGAACAATGAAAAAGAATTTAAGAAAAGAGAGGGAATGAAAAAGGAAGCAACCCACTTTTAGTGATTTTAGGTGCATATTGCTAGAATTGGAATGCCAAGTTACTATACTAAGTGAATTATTTTCTTCTTGGCAGAATACTCAAACTAATGGAGAATCAACGAAAGAGAAAAAAATTGGGAGTTGTTCCAAGCAAAAGAGGAAGTTCCTCAACACAAAAGAGTTCAAATTCTTCAAAGGAAAAAGAACCGCCACCATTGAAATC…
