# Supplementary material for: Resequencing Elucidates the Genetic Mechanism Underlying Elite Early-Maturing Potato Parent Kexin23
Source: Research Square preprint supplement (doi:10.21203/rs.3.rs-7582259/v1), 2025-12-02
Supplement: Supplementary file 13 [file Table S15. The statistics of SNPs variation on chromosomes of the offsprings originated from Kexin23.xls]

## Sheet: Sheet1
Chr.	Number of SNPs variation on chromosomes originated from Kexin23
	2019100_10	BE200158_13KS23	L201558_17	L201598_2	L201603_1	L201606_24	L201609_6	L201711_6	L2018112_3	L2018112_9	L201830_12	L201903_35	L2019102_2	L201982_6	LS16	LS18	LS19	LS20	LS22	LS24	LS28	LS30
chr1_1	17791	13712	15676	22164	15269	21370	12645	24139	17026	17049	14252	14970	23438	16519	18754	19634	18164	22686	12502	18890	22996	20797
chr1_2	25420	35135	38161	20278	41219	29282	35096	66405	58024	22954	37045	28072	39982	14567	35558	50553	42965	39717	32827	36622	40739	59099
chr1_3	24365	109897	27915	18611	215842	19352	217359	19668	64604	26297	71298	169508	22155	183443	48710	69129	222028	23606	37798	50735	230140	26237
chr1_4	45002	76171	84839	13844	68220	29749	34043	116286	63604	59892	37365	65144	87467	21318	81046	48783	84653	84112	31293	59173	98097	97147
chr2_1	11816	20315	18137	55205	66960	54537	68770	20138	19999	15922	15720	20308	61172	17765	15797	67463	12379	23235	17215	22005	21293	14965
chr2_2	5411	9169	5287	11384	11759	9862	10760	7328	7504	6563	8313	8491	12376	7442	7135	11425	8495	6416	9054	9291	10860	9086
chr2_3	3315	6445	4614	5808	4881	4018	4877	5452	6681	5841	5585	6366	6352	3305	5912	7187	3943	6998	3463	6394	4046	5524
chr2_4	3744	4936	3812	6184	4436	4964	4506	4414	5444	4012	3628	5992	4602	4182	3391	5869	4087	5890	5024	3612	5568	4272
chr4_1	12570	14493	12619	12960	13134	11362	15044	10678	16234	14027	12422	12813	15925	11965	13899	15030	12861	14419	9943	14449	15774	12619
chr4_2	40784	16085	13709	42812	26725	24521	24377	46147	30252	15181	51281	46173	17450	43602	15065	44290	45725	45561	26312	15445	14848	36240
chr4_3	3823	3732	3996	3824	4002	3588	3687	4108	4140	4413	3751	4029	3701	3857	3997	4064	4040	3359	3440	4507	3912	3412
chr4_4	15071	14613	13948	12860	16037	12674	16118	14541	14231	14772	14527	15665	12998	12899	12767	14426	15180	12770	11502	19529	14314	12085
chr7_1	15085	6163	5289	11152	9308	5136	9537	5058	9099	14722	7090	5245	6926	7218	6597	11966	5350	4554	5510	7452	12251	9719
chr7_2	12767	7569	12931	10861	9045	11274	8791	29998	30846	16535	29358	29771	13331	9712	15933	15198	29047	33311	7777	10563	18377	30369
chr7_3	13443	6928	6578	10863	5967	6592	6486	5915	12935	14416	8240	5791	8315	9842	10465	10951	5655	6041	5401	12502	9200	9072
chr7_4	15125	10192	9189	12151	10905	9496	10438	15373	61575	21640	18296	14935	13128	12748	19325	17717	14205	11335	12978	17413	11311	11294
chr9_1	7416	6670	5458	7884	9084	7190	8044	5290	6988	3321	6575	5683	6570	6889	4669	9119	6067	5391	5380	8898	9343	8815
chr9_2	8831	7975	5967	9536	11254	9755	10996	5033	9853	7164	6508	8153	8703	7843	5011	8259	7807	6301	8220	8854	10819	8524
chr9_3	16066	17313	7224	15814	21273	14296	19063	7086	10884	7643	12954	16194	18587	8672	7737	19878	12466	22572	8207	22328	19848	17955
chr9_4	13676	12301	9882	17076	18591	13105	17399	9216	16716	7444	15394	15329	12449	9732	11600	17071	13833	11646	12193	12912	18510	17440
chr12_1	7078	3969	7437	10668	8519	6380	8472	5577	5344	5944	9123	6857	3779	7376	9955	7873	8225	9604	7214	11545	5605	5819
chr12_2	3560	5523	6070	4655	4048	5311	6131	6750	6114	6576	4398	5657	6576	5311	4065	8769	4731	5265	9678	7879	5607	4019
chr12_3	7766	8391	7828	13020	10094	12077	11904	10229	10363	8297	11319	9838	8655	7953	8438	10600	9930	12091	6699	7586	7569	8308
chr12_4	1024	1410	2001	1605	1704	1445	1449	1673	1905	1950	1549	1178	2232	1676	1867	1306	1362	1578	1470	1494	1940	1055
chr3_1	3156	2372	2445	1790	2220	1821	2359	1948	3893	2599	3635	3056	1645	2672	1990	2094	3174	1940	2733	2442	2090	3187
chr3_2	4215	6457	4849	6009	4590	7413	7410	3880	8771	3187	6956	9303	4852	8315	7548	6243	5611	3796	5177	6544	6526	6606
chr3_3	6277	3311	2196	1681	2500	3074	2524	4518	5761	1264	2121	3799	1587	4047	3735	4854	3957	2920	4647	3235	2984	1740
chr3_4	9174	6305	5348	3279	5977	5537	9832	5957	9490	3835	9924	11036	3578	5199	5462	3427	7535	3105	6143	7958	4487	8110
chr5_1	52019	75397	96672	75976	22607	78778	13106	14692	103524	102350	19876	75205	14575	97628	69628	49375	13457	96063	53102	62511	59520	57281
chr5_2	8469	15881	32081	15536	20770	31032	8089	9894	43666	17795	11841	12055	8001	19809	14773	12602	7346	16010	13004	11614	13131	23256
chr5_3	2495	3747	2057	3523	2789	3319	4114	2277	5209	2943	2595	2268	4310	2839	3896	2874	2691	2373	2632	3869	2361	3531
chr5_4	1491	2333	1521	2280	3860	2680	3506	1858	4580	2938	2669	2286	1449	2142	2051	1228	2207	1936	1579	2597	2376	2804
chr6_1	9808	9631	9126	9522	10332	8156	8897	7609	22458	11542	10751	7757	12284	10636	7713	11860	11040	11396	22950	20302	11963	10940
chr6_2	8363	8985	25700	23097	9826	7258	10160	4641	7858	25812	8957	8006	8692	28847	6666	29481	24978	33042	5293	10051	7090	10025
chr6_3	2309	2033	3362	2009	2383	2731	2308	2305	2019	4605	3258	2256	2784	4355	1883	3418	4733	5618	5581	3188	2639	3613
chr6_4	6834	4603	5136	4759	3943	5367	5078	2238	4500	4674	6382	3523	5944	5625	4763	5927	6977	3455	5451	6479	5697	4707
chr8_1	8152	7257	8937	7440	6082	9695	5595	6967	34409	11109	6915	9533	8791	6792	10771	7028	11071	6661	8484	11196	6483	8668
chr8_2	24303	13439	16942	15054	10066	18679	12783	20170	25180	18879	14134	24660	19263	14281	21338	13096	22537	16718	11019	12838	14910	19194
chr8_3	9150	10141	12105	6475	9287	12398	10988	12966	10909	8757	9437	9820	10646	9009	7875	11519	9006	10500	13616	5390	12015	10187
chr8_4	4086	2420	3165	2276	2539	3860	2846	4359	5105	3331	4146	5083	6602	3543	3820	2241	4050	2467	2476	1585	4207	3196
chr10_1	11052	8461	9982	8043	10420	11409	4736	3376	18307	7858	3219	8129	19406	8819	15775	11068	7112	4016	10148	9569	16407	11558
chr10_2	2239	1245	4020	1380	3533	3576	1243	998	4090	1200	2272	2710	3671	1751	4085	2527	2032	2414	3355	2627	4267	3294
chr10_3	1535	1907	1630	1999	953	1393	1276	894	3512	2357	2043	2629	2381	2691	2071	1633	2188	1113	1131	1316	2558	2821
chr10_4	604	942	820	297	456	888	841	525	1239	391	478	1028	1583	986	885	713	746	223	508	351	1455	905
chr11_1	4369	7976	4496	8385	7611	6976	4763	9950	8850	5623	6320	6143	8926	5925	3378	3800	4425	7486	10949	6662	9648	6103
chr11_2	6063	8571	4918	5585	8158	4944	7894	7859	11638	6089	8471	7783	11181	7637	2022	4428	7019	7444	6587	3292	8238	8916
chr11_3	3742	8967	7916	4573	8467	8231	11956	8618	12274	7814	11889	9007	11994	7240	4911	6835	7310	9494	6306	13162	10232	5805
chr11_4	6338	4851	6020	4371	6105	6792	4526	6394	7275	3877	6991	5626	8436	3760	4644	5588	5593	7525	6145	6851	6671	4976
