# Supplementary material for: Resequencing Elucidates the Genetic Mechanism Underlying Elite Early-Maturing Potato Parent Kexin23
Source: Research Square preprint supplement (doi:10.21203/rs.3.rs-7582259/v1), 2025-12-02
Supplement: Supplementary file 15 [file Table S16 Primers for qRT-PCR.xls]

## Sheet: Sheet1
Gene ID	Fwd-Primer	Rev-Primer
C88_C12H1G014800	GTATGTATTTTGCCCACGGT	AGGCAAATATTTCTCAAGCA
C88_C12H1G026970	ATGGCTTATGCTGCTGTTAC	AACATTTCTTGATTCCGAGT
C88_C01H3G136010	ATGGAGAATCAACGAAAGAG	CTCTTGATAAACCTGCTGAC
PGSC0003DMT400016092	ATTTAGCTTTGGACTTGGAG	ACTGAAGGATGAAACAGAGA
EF1α	ATTGGAAACGGATATGCTCCA	TCCTTACCTGAACGCCTGTCA
