# Supplementary material for: Resequencing Elucidates the Genetic Mechanism Underlying Elite Early-Maturing Potato Parent Kexin23
Source: Research Square preprint supplement (doi:10.21203/rs.3.rs-7582259/v1), 2025-12-02
Supplement: Supplementary file 17 [file Table S2. Summary of resequencing data..xls]

## Sheet: sheet1
Sample	Clean Base(bp)	Q20(%)	Q30(%)	Mapping rate(%)	Average depth(X)
L2019100-10	13898107294	99	96.39	99.23	5.57
Aula	13167311930	99.06	96.61	99.24	5.46
BE200158-13×KX23	14113517848	98.9	96.06	99.27	4.86
Kexin23	13250675802	98.98	96.36	99.27	4.96
Kexin25	13168860000	98.55	94.81	99.28	5.65
Kexin24	13972139316	98.94	96.2	99.29	5.68
L201558-17	13645922588	99.01	96.42	99.31	5.89
L201598-2	13949429422	99.07	96.65	99.31	5.52
L201603-1	12768000046	99.18	97.02	99.32	5.63
L201606-24	14242471886	98.83	95.86	99.34	5.61
L201609-6	14078785602	98.67	95.25	99.35	5.85
L201711-6	13904683556	98.97	96.29	99.35	5.95
L2018112-3	13415326356	99.02	96.51	99.36	5.52
L2018112-9	13352375136	99.02	96.45	99.37	5.65
L201830-12	13467318378	98.99	96.35	99.38	5.78
L201903-35	13519020028	99.04	96.52	99.38	5.68
L2019102-2	14249063840	98.97	96.3	99.39	5.86
L201982-6	13076786520	99.41	97.95	99.39	5.87
Longshu16	13264893424	98.94	96.15	99.39	5.75
Longshu18	13319390656	98.94	96.18	99.4	5.9
Longshu19	13693909836	99	96.43	99.42	5.58
Longshu20	11421391676	98.92	96.12	99.43	5.71
Longshu22	11670013550	98.88	96	99.43	5.83
Longshu24	13800809454	99.11	96.84	99.44	5.54
Longshu28	13898870062	98.83	95.81	99.47	5.62
Longshu30	13598559366	99.06	96.65	99.48	5.6
