# Supplementary material for: Resequencing Elucidates the Genetic Mechanism Underlying Elite Early-Maturing Potato Parent Kexin23
Source: Research Square preprint supplement (doi:10.21203/rs.3.rs-7582259/v1), 2025-12-02
Supplement: Supplementary file 19 [file Table S3. SNPs variation and annotation.xls]

## Sheet: Sheet1
Region	Effect	VariantNumber
CDS	missense_variant	941496
CDS	synonymous_variant	657151
CDS	stop_gained	31252
CDS	stop_lost	3500
CDS	start_lost	1966
CDS	stop_retained_variant	1534
CDS	initiator_codon_variant	316
Other	intergenic_region	39464672
Other	upstream_gene_variant	6087875
Other	downstream_gene_variant	5732099
Other	intron_variant	4899533
Other	3_prime_UTR_variant	433828
Other	5_prime_UTR_variant	240664
Other	splice_region_variant	104698
Other	5_prime_UTR_premature_start_codon_gain_variant	36143
Other	splice_acceptor_variant	5950
Other	splice_donor_variant	4354
Other	intragenic_variant	1661
Total Variants	--	46498047
