# Supplementary material for: Resequencing Elucidates the Genetic Mechanism Underlying Elite Early-Maturing Potato Parent Kexin23
Source: Research Square preprint supplement (doi:10.21203/rs.3.rs-7582259/v1), 2025-12-02
Supplement: Supplementary file 21 [file Table S4. InDels variation and annotation.xls]

## Sheet: Sheet1
Region	Effect	VariantNumber
CDS	frameshift_variant	57287
CDS	disruptive_inframe_deletion	11155
CDS	conservative_inframe_deletion	6367
CDS	disruptive_inframe_insertion	5849
CDS	conservative_inframe_insertion	5786
CDS	stop_gained	2142
CDS	start_lost	1450
CDS	stop_lost	891
CDS	stop_retained_variant	196
CDS	start_retained_variant	193
Other	intergenic_region	4004079
Other	upstream_gene_variant	1047809
Other	downstream_gene_variant	949426
Other	intron_variant	809278
Other	3_prime_UTR_variant	91376
Other	5_prime_UTR_variant	57812
Other	splice_region_variant	19645
Other	splice_acceptor_variant	1857
Other	non_coding_transcript_variant	1829
Other	splice_donor_variant	1291
Other	intragenic_variant	260
Other	exon_loss_variant	57
Other	bidirectional_gene_fusion	51
Other	5_prime_UTR_truncation	20
Other	3_prime_UTR_truncation	9
Other	gene_fusion	4
Total Variants	--	5021119
