# Supplementary material for: Resequencing Elucidates the Genetic Mechanism Underlying Elite Early-Maturing Potato Parent Kexin23
Source: Research Square preprint supplement (doi:10.21203/rs.3.rs-7582259/v1), 2025-12-02
Supplement: Supplementary file 23 [file Table S5. Compound variation and annotation.xls]

## Sheet: Sheet1
Region	Effect	VariantNumber
CDS	frameshift_variant	4355
CDS	missense_variant	4109
CDS	synonymous_variant	1554
CDS	disruptive_inframe_deletion	476
CDS	disruptive_inframe_insertion	455
CDS	conservative_inframe_insertion	405
CDS	stop_gained	303
CDS	conservative_inframe_deletion	237
CDS	start_lost	52
CDS	stop_lost	49
CDS	stop_retained_variant	14
CDS	start_retained_variant	3
CDS	initiator_codon_variant	2
Other	intergenic_region	274754
Other	upstream_gene_variant	59163
Other	downstream_gene_variant	51623
Other	intron_variant	37843
Other	3_prime_UTR_variant	3762
Other	5_prime_UTR_variant	2469
Other	splice_region_variant	934
Other	5_prime_UTR_premature_start_codon_gain_variant	264
Other	splice_acceptor_variant	102
Other	splice_donor_variant	71
Other	non_coding_transcript_variant	65
Other	intragenic_variant	18
Other	exon_loss_variant	5
Other	3_prime_UTR_truncation	2
Other	gene_fusion	1
Other	bidirectional_gene_fusion	1
Total Variants	--	323435
