# Supplementary material for: Resequencing Elucidates the Genetic Mechanism Underlying Elite Early-Maturing Potato Parent Kexin23
Source: Research Square preprint supplement (doi:10.21203/rs.3.rs-7582259/v1), 2025-12-02
Supplement: Supplementary file 25 [file Table S6. Distribution frequency of SNPs across genomic regions.xls]

## Sheet: Sheet1
Chr.	Position-start	Position-end	Number	Rate
chr1_1	0	100000	994	0.00994
chr1_1	100000	200000	2125	0.02125
chr1_1	200000	300000	2929	0.02929
chr1_1	300000	400000	1693	0.01693
chr1_1	400000	500000	2295	0.02295
chr1_1	500000	600000	3061	0.03061
chr1_1	600000	700000	1644	0.01644
chr1_1	700000	800000	2459	0.02459
chr1_1	800000	900000	1070	0.0107
chr1_1	900000	1000000	2864	0.02864
chr1_1	1000000	1100000	1713	0.01713
chr1_1	1100000	1200000	1672	0.01672
chr1_1	1200000	1300000	1866	0.01866
chr1_1	1300000	1400000	1047	0.01047
chr1_1	1400000	1500000	1861	0.01861
chr1_1	1500000	1600000	1524	0.01524
chr1_1	1600000	1700000	856	0.00856
chr1_1	1700000	1800000	668	0.00668
chr1_1	1800000	1900000	1491	0.01491
chr1_1	1900000	2000000	2232	0.02232
chr1_1	2000000	2100000	1473	0.01473
chr1_1	2100000	2200000	2480	0.0248
chr1_1	2200000	2300000	1820	0.0182
chr1_1	2300000	2400000	1092	0.01092
chr1_1	2400000	2500000	1278	0.01278
chr1_1	2500000	2600000	1535	0.01535
chr1_1	2600000	2700000	1847	0.01847
chr1_1	2700000	2800000	1702	0.01702
chr1_1	2800000	2900000	2133	0.02133
chr1_1	2900000	3000000	1883	0.01883
chr1_1	3000000	3100000	2608	0.02608
chr1_1	3100000	3200000	2490	0.0249
chr1_1	3200000	3300000	2273	0.02273
chr1_1	3300000	3400000	2056	0.02056
chr1_1	3400000	3500000	2602	0.02602
chr1_1	3500000	3600000	2236	0.02236
chr1_1	3600000	3700000	2222	0.02222
chr1_1	3700000	3800000	2647	0.02647
chr1_1	3800000	3900000	2344	0.02344
chr1_1	3900000	4000000	2454	0.02454
chr1_1	4000000	4100000	2408	0.02408
chr1_1	4100000	4200000	2489	0.02489
chr1_1	4200000	4300000	2103	0.02103
chr1_1	4300000	4400000	2537	0.02537
chr1_1	4400000	4500000	2789	0.02789
chr1_1	4500000	4600000	2454	0.02454
chr1_1	4600000	4700000	2086	0.02086
chr1_1	4700000	4800000	2555	0.02555
chr1_1	4800000	4900000	909	0.00909
chr1_1	4900000	5000000	1958	0.01958
chr1_1	5000000	5100000	1910	0.0191
chr1_1	5100000	5200000	2058	0.02058
chr1_1	5200000	5300000	1654	0.01654
chr1_1	5300000	5400000	2465	0.02465
chr1_1	5400000	5500000	2307	0.02307
chr1_1	5500000	5600000	1000	0.01
chr1_1	5600000	5700000	2111	0.02111
chr1_1	5700000	5800000	2054	0.02054
chr1_1	5800000	5900000	1959	0.01959
chr1_1	5900000	6000000	1980	0.0198
chr1_1	6000000	6100000	1909	0.01909
chr1_1	6100000	6200000	1485	0.01485
chr1_1	6200000	6300000	1596	0.01596
chr1_1	6300000	6400000	1849	0.01849
chr1_1	6400000	6500000	2516	0.02516
chr1_1	6500000	6600000	2342	0.02342
chr1_1	6600000	6700000	18	0.00018
chr1_1	6700000	6800000	0	0
chr1_1	6800000	6900000	3	3e-05
chr1_1	6900000	7000000	0	0
chr1_1	7000000	7100000	0	0
chr1_1	7100000	7200000	33	0.00033
chr1_1	7200000	7300000	0	0
chr1_1	7300000	7400000	60	0.0006
chr1_1	7400000	7500000	2459	0.02459
chr1_1	7500000	7600000	2755	0.02755
chr1_1	7600000	7700000	3801	0.03801
chr1_1	7700000	7800000	4939	0.04939
chr1_1	7800000	7900000	4067	0.04067
chr1_1	7900000	8000000	5613	0.05613
chr1_1	8000000	8100000	2566	0.02566
chr1_1	8100000	8200000	1369	0.01369
chr1_1	8200000	8300000	2166	0.02166
chr1_1	8300000	8400000	2018	0.02018
chr1_1	8400000	8500000	1465	0.01465
chr1_1	8500000	8600000	1631	0.01631
chr1_1	8600000	8700000	816	0.00816
chr1_1	8700000	8800000	437	0.00437
chr1_1	8800000	8900000	1096	0.01096
chr1_1	8900000	9000000	1706	0.01706
chr1_1	9000000	9100000	1412	0.01412
chr1_1	9100000	9200000	1662	0.01662
chr1_1	9200000	9300000	1445	0.01445
chr1_1	9300000	9400000	4	4e-05
chr1_1	9400000	9500000	32	0.00032
chr1_1	9500000	9600000	186	0.00186
chr1_1	9600000	9700000	0	0
chr1_1	9700000	9800000	46	0.00046
chr1_1	9800000	9900000	28	0.00028
chr1_1	9900000	10000000	0	0
chr1_1	10000000	10100000	10	0.0001
chr1_1	10100000	10200000	7	7e-05
chr1_1	10200000	10300000	0	0
chr1_1	10300000	10400000	0	0
chr1_1	10400000	10500000	0	0
chr1_1	10500000	10600000	0	0
chr1_1	10600000	10700000	0	0
chr1_1	10700000	10800000	0	0
chr1_1	10800000	10900000	8	8e-05
chr1_1	10900000	11000000	0	0
chr1_1	11000000	11100000	0	0
chr1_1	11100000	11200000	0	0
chr1_1	11200000	11300000	0	0
chr1_1	11300000	11400000	6	6e-05
chr1_1	11400000	11500000	0	0
chr1_1	11500000	11600000	19	0.00019
chr1_1	11600000	11700000	13	0.00013
chr1_1	11700000	11800000	78	0.00078
chr1_1	11800000	11900000	41	0.00041
chr1_1	11900000	12000000	22	0.00022
chr1_1	12000000	12100000	30	0.0003
chr1_1	12100000	12200000	0	0
chr1_1	12200000	12300000	235	0.00235
chr1_1	12300000	12400000	128	0.00128
chr1_1	12400000	12500000	475	0.00475
chr1_1	12500000	12600000	1825	0.01825
chr1_1	12600000	12700000	1604	0.01604
chr1_1	12700000	12800000	1779	0.01779
chr1_1	12800000	12900000	490	0.0049
chr1_1	12900000	13000000	1317	0.01317
chr1_1	13000000	13100000	2622	0.02622
chr1_1	13100000	13200000	1249	0.01249
chr1_1	13200000	13300000	38	0.00038
chr1_1	13300000	13400000	40	0.0004
chr1_1	13400000	13500000	0	0
chr1_1	13500000	13600000	7	7e-05
chr1_1	13600000	13700000	52	0.00052
chr1_1	13700000	13800000	2	2e-05
chr1_1	13800000	13900000	73	0.00073
chr1_1	13900000	14000000	62	0.00062
chr1_1	14000000	14100000	68	0.00068
chr1_1	14100000	14200000	17	0.00017
chr1_1	14200000	14300000	17	0.00017
chr1_1	14300000	14400000	7	7e-05
chr1_1	14400000	14500000	1100	0.011
chr1_1	14500000	14600000	1932	0.01932
chr1_1	14600000	14700000	1958	0.01958
chr1_1	14700000	14800000	2902	0.02902
chr1_1	14800000	14900000	1356	0.01356
chr1_1	14900000	15000000	1207	0.01207
chr1_1	15000000	15100000	878	0.00878
chr1_1	15100000	15200000	1156	0.01156
chr1_1	15200000	15300000	353	0.00353
chr1_1	15300000	15400000	1015	0.01015
chr1_1	15400000	15500000	1501	0.01501
chr1_1	15500000	15600000	1767	0.01767
chr1_1	15600000	15700000	962	0.00962
chr1_1	15700000	15800000	1447	0.01447
chr1_1	15800000	15900000	1868	0.01868
chr1_1	15900000	16000000	2772	0.02772
chr1_1	16000000	16100000	3282	0.03282
chr1_1	16100000	16200000	4179	0.04179
chr1_1	16200000	16300000	2819	0.02819
chr1_1	16300000	16400000	2054	0.02054
chr1_1	16400000	16500000	1857	0.01857
chr1_1	16500000	16600000	1936	0.01936
chr1_1	16600000	16700000	1659	0.01659
chr1_1	16700000	16800000	1537	0.01537
chr1_1	16800000	16900000	796	0.00796
chr1_1	16900000	17000000	2085	0.02085
chr1_1	17000000	17100000	1693	0.01693
chr1_1	17100000	17200000	1024	0.01024
chr1_1	17200000	17300000	854	0.00854
chr1_1	17300000	17400000	2300	0.023
chr1_1	17400000	17500000	2349	0.02349
chr1_1	17500000	17600000	1600	0.016
chr1_1	17600000	17700000	2120	0.0212
chr1_1	17700000	17800000	1253	0.01253
chr1_1	17800000	17900000	1515	0.01515
chr1_1	17900000	18000000	1023	0.01023
chr1_1	18000000	18100000	882	0.00882
chr1_1	18100000	18200000	989	0.00989
chr1_1	18200000	18300000	711	0.00711
chr1_1	18300000	18400000	1832	0.01832
chr1_1	18400000	18500000	3373	0.03373
chr1_1	18500000	18600000	1856	0.01856
chr1_1	18600000	18700000	1749	0.01749
chr1_1	18700000	18800000	4466	0.04466
chr1_1	18800000	18900000	2077	0.02077
chr1_1	18900000	19000000	1358	0.01358
chr1_1	19000000	19100000	1450	0.0145
chr1_1	19100000	19200000	2104	0.02104
chr1_1	19200000	19300000	2408	0.02408
chr1_1	19300000	19400000	2288	0.02288
chr1_1	19400000	19500000	2260	0.0226
chr1_1	19500000	19600000	3334	0.03334
chr1_1	19600000	19700000	2256	0.02256
chr1_1	19700000	19800000	1748	0.01748
chr1_1	19800000	19900000	2351	0.02351
chr1_1	19900000	20000000	2109	0.02109
chr1_1	20000000	20100000	1988	0.01988
chr1_1	20100000	20200000	1790	0.0179
chr1_1	20200000	20300000	1610	0.0161
chr1_1	20300000	20400000	2558	0.02558
chr1_1	20400000	20500000	2566	0.02566
chr1_1	20500000	20600000	1587	0.01587
chr1_1	20600000	20700000	1695	0.01695
chr1_1	20700000	20800000	1624	0.01624
chr1_1	20800000	20900000	1839	0.01839
chr1_1	20900000	21000000	2258	0.02258
chr1_1	21000000	21100000	1479	0.01479
chr1_1	21100000	21200000	1799	0.01799
chr1_1	21200000	21300000	1525	0.01525
chr1_1	21300000	21400000	3213	0.03213
chr1_1	21400000	21500000	2543	0.02543
chr1_1	21500000	21600000	2392	0.02392
chr1_1	21600000	21700000	2518	0.02518
chr1_1	21700000	21800000	3438	0.03438
chr1_1	21800000	21900000	2811	0.02811
chr1_1	21900000	22000000	2167	0.02167
chr1_1	22000000	22100000	3163	0.03163
chr1_1	22100000	22200000	1637	0.01637
chr1_1	22200000	22300000	2693	0.02693
chr1_1	22300000	22400000	3367	0.03367
chr1_1	22400000	22500000	2571	0.02571
chr1_1	22500000	22600000	1973	0.01973
chr1_1	22600000	22700000	1643	0.01643
chr1_1	22700000	22800000	2917	0.02917
chr1_1	22800000	22900000	1514	0.01514
chr1_1	22900000	23000000	1105	0.01105
chr1_1	23000000	23100000	2158	0.02158
chr1_1	23100000	23200000	1895	0.01895
chr1_1	23200000	23300000	1147	0.01147
chr1_1	23300000	23400000	2130	0.0213
chr1_1	23400000	23500000	1950	0.0195
chr1_1	23500000	23600000	3037	0.03037
chr1_1	23600000	23700000	3068	0.03068
chr1_1	23700000	23800000	2005	0.02005
chr1_1	23800000	23900000	2197	0.02197
chr1_1	23900000	24000000	2439	0.02439
chr1_1	24000000	24100000	2819	0.02819
chr1_1	24100000	24200000	2318	0.02318
chr1_1	24200000	24300000	2270	0.0227
chr1_1	24300000	24400000	3313	0.03313
chr1_1	24400000	24500000	2621	0.02621
chr1_1	24500000	24600000	1053	0.01053
chr1_1	24600000	24700000	731	0.00731
chr1_1	24700000	24800000	959	0.00959
chr1_1	24800000	24900000	1423	0.01423
chr1_1	24900000	25000000	867	0.00867
chr1_1	25000000	25100000	3028	0.03028
chr1_1	25100000	25200000	1420	0.0142
chr1_1	25200000	25300000	2042	0.02042
chr1_1	25300000	25400000	914	0.00914
chr1_1	25400000	25500000	1051	0.01051
chr1_1	25500000	25600000	2052	0.02052
chr1_1	25600000	25700000	2214	0.02214
chr1_1	25700000	25800000	2750	0.0275
chr1_1	25800000	25900000	1626	0.01626
chr1_1	25900000	26000000	1887	0.01887
chr1_1	26000000	26100000	1206	0.01206
chr1_1	26100000	26200000	2864	0.02864
chr1_1	26200000	26300000	2879	0.02879
chr1_1	26300000	26400000	2206	0.02206
chr1_1	26400000	26500000	1451	0.01451
chr1_1	26500000	26600000	1284	0.01284
chr1_1	26600000	26700000	1741	0.01741
chr1_1	26700000	26800000	1553	0.01553
chr1_1	26800000	26900000	1219	0.01219
chr1_1	26900000	27000000	1817	0.01817
chr1_1	27000000	27100000	1454	0.01454
chr1_1	27100000	27200000	904	0.00904
chr1_1	27200000	27300000	1341	0.01341
chr1_1	27300000	27400000	1977	0.01977
chr1_1	27400000	27500000	1350	0.0135
chr1_1	27500000	27600000	1034	0.01034
chr1_1	27600000	27700000	2256	0.02256
chr1_1	27700000	27800000	2601	0.02601
chr1_1	27800000	27900000	1703	0.01703
chr1_1	27900000	28000000	1968	0.01968
chr1_1	28000000	28100000	1600	0.016
chr1_1	28100000	28200000	1603	0.01603
chr1_1	28200000	28300000	2034	0.02034
chr1_1	28300000	28400000	2491	0.02491
chr1_1	28400000	28500000	6153	0.06153
chr1_1	28500000	28600000	4173	0.04173
chr1_1	28600000	28700000	2233	0.02233
chr1_1	28700000	28800000	2751	0.02751
chr1_1	28800000	28900000	1720	0.0172
chr1_1	28900000	29000000	2679	0.02679
chr1_1	29000000	29100000	2302	0.02302
chr1_1	29100000	29200000	2596	0.02596
chr1_1	29200000	29300000	1927	0.01927
chr1_1	29300000	29400000	10	0.0001
chr1_1	29400000	29500000	8	8e-05
chr1_1	29500000	29600000	141	0.00141
chr1_1	29600000	29700000	2684	0.02684
chr1_1	29700000	29800000	1786	0.01786
chr1_1	29800000	29900000	2178	0.02178
chr1_1	29900000	30000000	1906	0.01906
chr1_1	30000000	30100000	2321	0.02321
chr1_1	30100000	30200000	1680	0.0168
chr1_1	30200000	30300000	2519	0.02519
chr1_1	30300000	30400000	2627	0.02627
chr1_1	30400000	30500000	2557	0.02557
chr1_1	30500000	30600000	2424	0.02424
chr1_1	30600000	30700000	2204	0.02204
chr1_1	30700000	30800000	2264	0.02264
chr1_1	30800000	30900000	2091	0.02091
chr1_1	30900000	31000000	2574	0.02574
chr1_1	31000000	31100000	1137	0.01137
chr1_1	31100000	31200000	1362	0.01362
chr1_1	31200000	31300000	2050	0.0205
chr1_1	31300000	31400000	3534	0.03534
chr1_1	31400000	31500000	3648	0.03648
chr1_1	31500000	31600000	1790	0.0179
chr1_1	31600000	31700000	3679	0.03679
chr1_1	31700000	31800000	2498	0.02498
chr1_1	31800000	31900000	1551	0.01551
chr1_1	31900000	32000000	3902	0.03902
chr1_1	32000000	32100000	3585	0.03585
chr1_1	32100000	32200000	2386	0.02386
chr1_1	32200000	32300000	2282	0.02282
chr1_1	32300000	32400000	3442	0.03442
chr1_1	32400000	32500000	4187	0.04187
chr1_1	32500000	32600000	3333	0.03333
chr1_1	32600000	32700000	2024	0.02024
chr1_1	32700000	32800000	5018	0.05018
chr1_1	32800000	32900000	4302	0.04302
chr1_1	32900000	33000000	2757	0.02757
chr1_1	33000000	33100000	4164	0.04164
chr1_1	33100000	33200000	991	0.00991
chr1_1	33200000	33300000	2895	0.02895
chr1_1	33300000	33400000	1579	0.01579
chr1_1	33400000	33500000	2337	0.02337
chr1_1	33500000	33600000	2383	0.02383
chr1_1	33600000	33700000	2930	0.0293
chr1_1	33700000	33800000	4110	0.0411
chr1_1	33800000	33900000	3252	0.03252
chr1_1	33900000	34000000	4289	0.04289
chr1_1	34000000	34100000	2663	0.02663
chr1_1	34100000	34200000	2168	0.02168
chr1_1	34200000	34300000	1970	0.0197
chr1_1	34300000	34400000	1672	0.01672
chr1_1	34400000	34500000	1557	0.01557
chr1_1	34500000	34600000	1499	0.01499
chr1_1	34600000	34700000	2442	0.02442
chr1_1	34700000	34800000	4249	0.04249
chr1_1	34800000	34900000	3768	0.03768
chr1_1	34900000	35000000	3424	0.03424
chr1_1	35000000	35100000	2023	0.02023
chr1_1	35100000	35200000	4099	0.04099
chr1_1	35200000	35300000	1775	0.01775
chr1_1	35300000	35400000	2717	0.02717
chr1_1	35400000	35500000	4885	0.04885
chr1_1	35500000	35600000	1126	0.01126
chr1_1	35600000	35700000	0	0
chr1_1	35700000	35800000	3	3e-05
chr1_1	35800000	35900000	9	9e-05
chr1_1	35900000	36000000	1	1e-05
chr1_1	36000000	36100000	1	1e-05
chr1_1	36100000	36200000	0	0
chr1_1	36200000	36300000	2	2e-05
chr1_1	36300000	36400000	23	0.00023
chr1_1	36400000	36500000	15	0.00015
chr1_1	36500000	36600000	3	3e-05
chr1_1	36600000	36700000	0	0
chr1_1	36700000	36800000	1	1e-05
chr1_1	36800000	36900000	0	0
chr1_1	36900000	37000000	7	7e-05
chr1_1	37000000	37100000	1	1e-05
chr1_1	37100000	37200000	0	0
chr1_1	37200000	37300000	3	3e-05
chr1_1	37300000	37400000	0	0
chr1_1	37400000	37500000	119	0.00119
chr1_1	37500000	37600000	10	0.0001
chr1_1	37600000	37700000	0	0
chr1_1	37700000	37800000	1	1e-05
chr1_1	37800000	37900000	180	0.0018
chr1_1	37900000	38000000	0	0
chr1_1	38000000	38100000	0	0
chr1_1	38100000	38200000	0	0
chr1_1	38200000	38300000	0	0
chr1_1	38300000	38400000	7	7e-05
chr1_1	38400000	38500000	7	7e-05
chr1_1	38500000	38600000	68	0.00068
chr1_1	38600000	38700000	484	0.00484
chr1_1	38700000	38800000	195	0.00195
chr1_1	38800000	38900000	438	0.00438
chr1_1	38900000	39000000	284	0.00284
chr1_1	39000000	39100000	525	0.00525
chr1_1	39100000	39200000	220	0.0022
chr1_1	39200000	39300000	964	0.00964
chr1_1	39300000	39400000	1551	0.01551
chr1_1	39400000	39500000	3223	0.03223
chr1_1	39500000	39600000	2232	0.02232
chr1_1	39600000	39700000	1924	0.01924
chr1_1	39700000	39800000	2543	0.02543
chr1_1	39800000	39900000	2211	0.02211
chr1_1	39900000	40000000	3340	0.0334
chr1_1	40000000	40100000	2624	0.02624
chr1_1	40100000	40200000	1729	0.01729
chr1_1	40200000	40300000	1888	0.01888
chr1_1	40300000	40400000	2404	0.02404
chr1_1	40400000	40500000	3284	0.03284
chr1_1	40500000	40600000	3375	0.03375
chr1_1	40600000	40700000	2431	0.02431
chr1_1	40700000	40800000	3624	0.03624
chr1_1	40800000	40900000	1839	0.01839
chr1_1	40900000	41000000	2164	0.02164
chr1_1	41000000	41100000	2973	0.02973
chr1_1	41100000	41200000	1571	0.01571
chr1_1	41200000	41300000	2910	0.0291
chr1_1	41300000	41400000	3030	0.0303
chr1_1	41400000	41500000	3822	0.03822
chr1_1	41500000	41600000	4701	0.04701
chr1_1	41600000	41700000	5558	0.05558
chr1_1	41700000	41800000	5846	0.05846
chr1_1	41800000	41900000	5838	0.05838
chr1_1	41900000	42000000	4707	0.04707
chr1_1	42000000	42100000	4800	0.048
chr1_1	42100000	42200000	3064	0.03064
chr1_1	42200000	42300000	4774	0.04774
chr1_1	42300000	42400000	3570	0.0357
chr1_1	42400000	42500000	1380	0.0138
chr1_1	42500000	42600000	2125	0.02125
chr1_1	42600000	42700000	2769	0.02769
chr1_1	42700000	42800000	2111	0.02111
chr1_1	42800000	42900000	1540	0.0154
chr1_1	42900000	43000000	1702	0.01702
chr1_1	43000000	43100000	1493	0.01493
chr1_1	43100000	43200000	1365	0.01365
chr1_1	43200000	43300000	3116	0.03116
chr1_1	43300000	43400000	2672	0.02672
chr1_1	43400000	43500000	2343	0.02343
chr1_1	43500000	43600000	2170	0.0217
chr1_1	43600000	43700000	2065	0.02065
chr1_1	43700000	43800000	2154	0.02154
chr1_1	43800000	43900000	3793	0.03793
chr1_1	43900000	44000000	2204	0.02204
chr1_1	44000000	44100000	1269	0.01269
chr1_1	44100000	44200000	843	0.00843
chr1_1	44200000	44300000	970	0.0097
chr1_1	44300000	44400000	1407	0.01407
chr1_1	44400000	44500000	1532	0.01532
chr1_1	44500000	44600000	1265	0.01265
chr1_1	44600000	44700000	441	0.00441
chr1_1	44700000	44800000	513	0.00513
chr1_1	44800000	44900000	2200	0.022
chr1_1	44900000	45000000	2158	0.02158
chr1_1	45000000	45100000	3476	0.03476
chr1_1	45100000	45200000	2641	0.02641
chr1_1	45200000	45300000	1464	0.01464
chr1_1	45300000	45400000	777	0.00777
chr1_1	45400000	45500000	3287	0.03287
chr1_1	45500000	45600000	3914	0.03914
chr1_1	45600000	45700000	2744	0.02744
chr1_1	45700000	45800000	1133	0.01133
chr1_1	45800000	45900000	866	0.00866
chr1_1	45900000	46000000	1137	0.01137
chr1_1	46000000	46100000	2688	0.02688
chr1_1	46100000	46200000	2658	0.02658
chr1_1	46200000	46300000	247	0.00247
chr1_1	46300000	46400000	1094	0.01094
chr1_1	46400000	46500000	1563	0.01563
chr1_1	46500000	46600000	616	0.00616
chr1_1	46600000	46700000	1625	0.01625
chr1_1	46700000	46800000	3294	0.03294
chr1_1	46800000	46900000	3264	0.03264
chr1_1	46900000	47000000	2767	0.02767
chr1_1	47000000	47100000	1727	0.01727
chr1_1	47100000	47200000	1726	0.01726
chr1_1	47200000	47300000	1238	0.01238
chr1_1	47300000	47400000	1386	0.01386
chr1_1	47400000	47500000	1093	0.01093
chr1_1	47500000	47600000	1467	0.01467
chr1_1	47600000	47700000	1505	0.01505
chr1_1	47700000	47800000	1628	0.01628
chr1_1	47800000	47900000	1379	0.01379
chr1_1	47900000	48000000	683	0.00683
chr1_1	48000000	48100000	2651	0.02651
chr1_1	48100000	48200000	1219	0.01219
chr1_1	48200000	48300000	1288	0.01288
chr1_1	48300000	48400000	2212	0.02212
chr1_1	48400000	48500000	2297	0.02297
chr1_1	48500000	48600000	4332	0.04332
chr1_1	48600000	48700000	4158	0.04158
chr1_1	48700000	48800000	2287	0.02287
chr1_1	48800000	48900000	1231	0.01231
chr1_1	48900000	49000000	1374	0.01374
chr1_1	49000000	49100000	4534	0.04534
chr1_1	49100000	49200000	2811	0.02811
chr1_1	49200000	49300000	4146	0.04146
chr1_1	49300000	49400000	3063	0.03063
chr1_1	49400000	49500000	2023	0.02023
chr1_1	49500000	49600000	3178	0.03178
chr1_1	49600000	49700000	1660	0.0166
chr1_1	49700000	49800000	1414	0.01414
chr1_1	49800000	49900000	1644	0.01644
chr1_1	49900000	50000000	1930	0.0193
chr1_1	50000000	50100000	3559	0.03559
chr1_1	50100000	50200000	7202	0.07202
chr1_1	50200000	50300000	4832	0.04832
chr1_1	50300000	50400000	2119	0.02119
chr1_1	50400000	50500000	6106	0.06106
chr1_1	50500000	50600000	1455	0.01455
chr1_1	50600000	50700000	1744	0.01744
chr1_1	50700000	50800000	4727	0.04727
chr1_1	50800000	50900000	3176	0.03176
chr1_1	50900000	51000000	3716	0.03716
chr1_1	51000000	51100000	3225	0.03225
chr1_1	51100000	51200000	2489	0.02489
chr1_1	51200000	51300000	2781	0.02781
chr1_1	51300000	51400000	2363	0.02363
chr1_1	51400000	51500000	4818	0.04818
chr1_1	51500000	51600000	6192	0.06192
chr1_1	51600000	51700000	3673	0.03673
chr1_1	51700000	51800000	3724	0.03724
chr1_1	51800000	51900000	3340	0.0334
chr1_1	51900000	52000000	3822	0.03822
chr1_1	52000000	52100000	2974	0.02974
chr1_1	52100000	52200000	1395	0.01395
chr1_1	52200000	52300000	3891	0.03891
chr1_1	52300000	52400000	2347	0.02347
chr1_1	52400000	52500000	5731	0.05731
chr1_1	52500000	52600000	4454	0.04454
chr1_1	52600000	52700000	3772	0.03772
chr1_1	52700000	52800000	7106	0.07106
chr1_1	52800000	52900000	3884	0.03884
chr1_1	52900000	53000000	2137	0.02137
chr1_1	53000000	53100000	2380	0.0238
chr1_1	53100000	53200000	2135	0.02135
chr1_1	53200000	53300000	2449	0.02449
chr1_1	53300000	53400000	2660	0.0266
chr1_1	53400000	53500000	2585	0.02585
chr1_1	53500000	53600000	1802	0.01802
chr1_1	53600000	53700000	1405	0.01405
chr1_1	53700000	53800000	2949	0.02949
chr1_1	53800000	53900000	1186	0.01186
chr1_1	53900000	54000000	878	0.00878
chr1_1	54000000	54100000	683	0.00683
chr1_1	54100000	54200000	1475	0.01475
chr1_1	54200000	54300000	1601	0.01601
chr1_1	54300000	54400000	2539	0.02539
chr1_1	54400000	54500000	1666	0.01666
chr1_1	54500000	54600000	1962	0.01962
chr1_1	54600000	54700000	1429	0.01429
chr1_1	54700000	54800000	3741	0.03741
chr1_1	54800000	54900000	2247	0.02247
chr1_1	54900000	55000000	1427	0.01427
chr1_1	55000000	55100000	1320	0.0132
chr1_1	55100000	55200000	1991	0.01991
chr1_1	55200000	55300000	2215	0.02215
chr1_1	55300000	55400000	3090	0.0309
chr1_1	55400000	55500000	4376	0.04376
chr1_1	55500000	55600000	1990	0.0199
chr1_1	55600000	55700000	2007	0.02007
chr1_1	55700000	55800000	2526	0.02526
chr1_1	55800000	55900000	2141	0.02141
chr1_1	55900000	56000000	1393	0.01393
chr1_1	56000000	56100000	2194	0.02194
chr1_1	56100000	56200000	899	0.00899
chr1_1	56200000	56300000	2669	0.02669
chr1_1	56300000	56400000	3331	0.03331
chr1_1	56400000	56500000	2476	0.02476
chr1_1	56500000	56600000	5068	0.05068
chr1_1	56600000	56700000	4032	0.04032
chr1_1	56700000	56800000	6065	0.06065
chr1_1	56800000	56900000	1781	0.01781
chr1_1	56900000	57000000	1255	0.01255
chr1_1	57000000	57100000	2774	0.02774
chr1_1	57100000	57200000	1942	0.01942
chr1_1	57200000	57300000	2001	0.02001
chr1_1	57300000	57400000	4211	0.04211
chr1_1	57400000	57500000	2716	0.02716
chr1_1	57500000	57600000	2049	0.02049
chr1_1	57600000	57700000	3108	0.03108
chr1_1	57700000	57800000	1486	0.01486
chr1_1	57800000	57900000	2813	0.02813
chr1_1	57900000	58000000	1283	0.01283
chr1_1	58000000	58100000	2261	0.02261
chr1_1	58100000	58200000	2995	0.02995
chr1_1	58200000	58300000	1710	0.0171
chr1_1	58300000	58400000	1325	0.01325
chr1_1	58400000	58500000	1328	0.01328
chr1_1	58500000	58600000	1411	0.01411
chr1_1	58600000	58700000	994	0.00994
chr1_1	58700000	58800000	2669	0.02669
chr1_1	58800000	58900000	2600	0.026
chr1_1	58900000	59000000	1184	0.01184
chr1_1	59000000	59100000	2257	0.02257
chr1_1	59100000	59200000	1540	0.0154
chr1_1	59200000	59300000	1213	0.01213
chr1_1	59300000	59400000	2371	0.02371
chr1_1	59400000	59500000	2009	0.02009
chr1_1	59500000	59600000	2627	0.02627
chr1_1	59600000	59700000	2843	0.02843
chr1_1	59700000	59800000	1929	0.01929
chr1_1	59800000	59900000	2120	0.0212
chr1_1	59900000	60000000	2306	0.02306
chr1_1	60000000	60100000	1325	0.01325
chr1_1	60100000	60200000	1877	0.01877
chr1_1	60200000	60300000	1630	0.0163
chr1_1	60300000	60400000	1299	0.01299
chr1_1	60400000	60500000	1843	0.01843
chr1_1	60500000	60600000	1112	0.01112
chr1_1	60600000	60700000	1673	0.01673
chr1_1	60700000	60800000	1078	0.01078
chr1_1	60800000	60900000	1265	0.01265
chr1_1	60900000	61000000	1477	0.01477
chr1_1	61000000	61100000	1415	0.01415
chr1_1	61100000	61200000	2689	0.02689
chr1_1	61200000	61300000	1806	0.01806
chr1_1	61300000	61400000	1266	0.01266
chr1_1	61400000	61500000	1836	0.01836
chr1_1	61500000	61600000	1346	0.01346
chr1_1	61600000	61700000	2583	0.02583
chr1_1	61700000	61800000	2613	0.02613
chr1_1	61800000	61900000	2890	0.0289
chr1_1	61900000	62000000	1668	0.01668
chr1_1	62000000	62100000	1384	0.01384
chr1_1	62100000	62200000	2508	0.02508
chr1_1	62200000	62300000	2205	0.02205
chr1_1	62300000	62400000	1693	0.01693
chr1_1	62400000	62500000	2645	0.02645
chr1_1	62500000	62600000	1766	0.01766
chr1_1	62600000	62700000	2385	0.02385
chr1_1	62700000	62800000	1505	0.01505
chr1_1	62800000	62900000	2930	0.0293
chr1_1	62900000	63000000	1410	0.0141
chr1_1	63000000	63100000	1504	0.01504
chr1_1	63100000	63200000	1501	0.01501
chr1_1	63200000	63300000	974	0.00974
chr1_1	63300000	63400000	2362	0.02362
chr1_1	63400000	63500000	1731	0.01731
chr1_1	63500000	63600000	1248	0.01248
chr1_1	63600000	63700000	2183	0.02183
chr1_1	63700000	63800000	1665	0.01665
chr1_1	63800000	63900000	2739	0.02739
chr1_1	63900000	64000000	2486	0.02486
chr1_1	64000000	64100000	3715	0.03715
chr1_1	64100000	64200000	3175	0.03175
chr1_1	64200000	64300000	2466	0.02466
chr1_1	64300000	64400000	2697	0.02697
chr1_1	64400000	64500000	2974	0.02974
chr1_1	64500000	64600000	7390	0.0739
chr1_1	64600000	64700000	6720	0.0672
chr1_1	64700000	64800000	3055	0.03055
chr1_1	64800000	64900000	2739	0.02739
chr1_1	64900000	65000000	3158	0.03158
chr1_1	65000000	65100000	2361	0.02361
chr1_1	65100000	65200000	3104	0.03104
chr1_1	65200000	65300000	1633	0.01633
chr1_1	65300000	65400000	2067	0.02067
chr1_1	65400000	65500000	2628	0.02628
chr1_1	65500000	65600000	3449	0.03449
chr1_1	65600000	65700000	2156	0.02156
chr1_1	65700000	65800000	1694	0.01694
chr1_1	65800000	65900000	3154	0.03154
chr1_1	65900000	66000000	3800	0.038
chr1_1	66000000	66100000	2646	0.02646
chr1_1	66100000	66200000	1747	0.01747
chr1_1	66200000	66300000	1898	0.01898
chr1_1	66300000	66400000	1449	0.01449
chr1_1	66400000	66500000	551	0.00551
chr1_1	66500000	66600000	2141	0.02141
chr1_1	66600000	66700000	3283	0.03283
chr1_1	66700000	66800000	2165	0.02165
chr1_1	66800000	66900000	2211	0.02211
chr1_1	66900000	67000000	2692	0.02692
chr1_1	67000000	67100000	3373	0.03373
chr1_1	67100000	67200000	1969	0.01969
chr1_1	67200000	67300000	1388	0.01388
chr1_1	67300000	67400000	4352	0.04352
chr1_1	67400000	67500000	4502	0.04502
chr1_1	67500000	67600000	1469	0.01469
chr1_1	67600000	67700000	2294	0.02294
chr1_1	67700000	67800000	2674	0.02674
chr1_1	67800000	67900000	2906	0.02906
chr1_1	67900000	68000000	3403	0.03403
chr1_1	68000000	68100000	3808	0.03808
chr1_1	68100000	68200000	2565	0.02565
chr1_1	68200000	68300000	3503	0.03503
chr1_1	68300000	68400000	1766	0.01766
chr1_1	68400000	68500000	1306	0.01306
chr1_1	68500000	68600000	2089	0.02089
chr1_1	68600000	68700000	1392	0.01392
chr1_1	68700000	68800000	842	0.00842
chr1_1	68800000	68900000	1099	0.01099
chr1_1	68900000	69000000	3582	0.03582
chr1_1	69000000	69100000	1773	0.01773
chr1_1	69100000	69200000	2611	0.02611
chr1_1	69200000	69300000	3050	0.0305
chr1_1	69300000	69400000	3730	0.0373
chr1_1	69400000	69500000	1998	0.01998
chr1_1	69500000	69600000	1996	0.01996
chr1_1	69600000	69700000	2442	0.02442
chr1_1	69700000	69800000	2058	0.02058
chr1_1	69800000	69900000	3502	0.03502
chr1_1	69900000	70000000	1829	0.01829
chr1_1	70000000	70100000	1317	0.01317
chr1_1	70100000	70200000	1779	0.01779
chr1_1	70200000	70300000	1212	0.01212
chr1_1	70300000	70400000	2486	0.02486
chr1_1	70400000	70500000	996	0.00996
chr1_1	70500000	70600000	0	0
chr1_1	70600000	70700000	0	0
chr1_1	70700000	70800000	3	3e-05
chr1_1	70800000	70900000	0	0
chr1_1	70900000	71000000	0	0
chr1_1	71000000	71100000	0	0
chr1_1	71100000	71200000	171	0.00171
chr1_1	71200000	71300000	1037	0.01037
chr1_1	71300000	71400000	724	0.00724
chr1_1	71400000	71500000	2173	0.02173
chr1_1	71500000	71600000	1886	0.01886
chr1_1	71600000	71700000	1126	0.01126
chr1_1	71700000	71800000	1197	0.01197
chr1_1	71800000	71900000	1060	0.0106
chr1_1	71900000	72000000	1110	0.0111
chr1_1	72000000	72100000	1312	0.01312
chr1_1	72100000	72200000	1743	0.01743
chr1_1	72200000	72300000	1631	0.01631
chr1_1	72300000	72400000	941	0.00941
chr1_1	72400000	72500000	956	0.00956
chr1_1	72500000	72600000	1631	0.01631
chr1_1	72600000	72700000	1259	0.01259
chr1_1	72700000	72800000	1378	0.01378
chr1_1	72800000	72900000	1689	0.01689
chr1_1	72900000	73000000	1310	0.0131
chr1_1	73000000	73100000	945	0.00945
chr1_1	73100000	73200000	1467	0.01467
chr1_1	73200000	73300000	1702	0.01702
chr1_1	73300000	73400000	1406	0.01406
chr1_1	73400000	73500000	2590	0.0259
chr1_1	73500000	73600000	2337	0.02337
chr1_1	73600000	73700000	2050	0.0205
chr1_1	73700000	73800000	2700	0.027
chr1_1	73800000	73900000	1341	0.01341
chr1_1	73900000	74000000	805	0.00805
chr1_1	74000000	74100000	1129	0.01129
chr1_1	74100000	74200000	1456	0.01456
chr1_1	74200000	74300000	776	0.00776
chr1_1	74300000	74400000	33	0.00033
chr1_1	74400000	74500000	0	0
chr1_1	74500000	74600000	12	0.00012
chr1_1	74600000	74700000	13	0.00013
chr1_1	74700000	74800000	126	0.00126
chr1_1	74800000	74900000	2148	0.02148
chr1_1	74900000	75000000	3927	0.03927
chr1_1	75000000	75100000	2034	0.02034
chr1_1	75100000	75200000	1865	0.01865
chr1_1	75200000	75300000	2157	0.02157
chr1_1	75300000	75400000	1820	0.0182
chr1_1	75400000	75500000	2224	0.02224
chr1_1	75500000	75600000	1832	0.01832
chr1_1	75600000	75700000	2588	0.02588
chr1_1	75700000	75800000	3744	0.03744
chr1_1	75800000	75900000	1153	0.01153
chr1_1	75900000	76000000	932	0.00932
chr1_1	76000000	76100000	1995	0.01995
chr1_1	76100000	76200000	1184	0.01184
chr1_1	76200000	76300000	925	0.00925
chr1_1	76300000	76400000	1003	0.01003
chr1_1	76400000	76500000	948	0.00948
chr1_1	76500000	76600000	1282	0.01282
chr1_1	76600000	76700000	1027	0.01027
chr1_1	76700000	76800000	1591	0.01591
chr1_1	76800000	76900000	1448	0.01448
chr1_1	76900000	77000000	962	0.00962
chr1_1	77000000	77100000	1113	0.01113
chr1_1	77100000	77200000	856	0.00856
chr1_1	77200000	77300000	996	0.00996
chr1_1	77300000	77400000	1091	0.01091
chr1_1	77400000	77500000	894	0.00894
chr1_1	77500000	77600000	4	4e-05
chr1_1	77600000	77700000	0	0
chr1_1	77700000	77800000	373	0.00373
chr1_1	77800000	77900000	1326	0.01326
chr1_1	77900000	78000000	1232	0.01232
chr1_1	78000000	78100000	830	0.0083
chr1_1	78100000	78200000	209	0.00209
chr1_1	78200000	78300000	21	0.00021
chr1_1	78300000	78400000	0	0
chr1_1	78400000	78500000	14	0.00014
chr1_1	78500000	78600000	157	0.00157
chr1_1	78600000	78700000	751	0.00751
chr1_1	78700000	78800000	122	0.00122
chr1_1	78800000	78900000	6	6e-05
chr1_1	78900000	79000000	814	0.00814
chr1_1	79000000	79100000	1782	0.01782
chr1_1	79100000	79200000	997	0.00997
chr1_1	79200000	79300000	1570	0.0157
chr1_1	79300000	79400000	2468	0.02468
chr1_1	79400000	79500000	2882	0.02882
chr1_1	79500000	79600000	2363	0.02363
chr1_1	79600000	79700000	2259	0.02259
chr1_1	79700000	79800000	1676	0.01676
chr1_1	79800000	79900000	2174	0.02174
chr1_1	79900000	80000000	3020	0.0302
chr1_1	80000000	80100000	3131	0.03131
chr1_1	80100000	80200000	2779	0.02779
chr1_1	80200000	80300000	1902	0.01902
chr1_1	80300000	80400000	2003	0.02003
chr1_1	80400000	80500000	1469	0.01469
chr1_1	80500000	80600000	165	0.00165
chr1_1	80600000	80700000	989	0.00989
chr1_1	80700000	80800000	2179	0.02179
chr1_1	80800000	80900000	1089	0.01089
chr1_1	80900000	81000000	814	0.00814
chr1_1	81000000	81100000	1526	0.01526
chr1_1	81100000	81200000	1848	0.01848
chr1_1	81200000	81300000	1269	0.01269
chr1_1	81300000	81400000	187	0.00187
chr1_1	81400000	81500000	0	0
chr1_1	81500000	81600000	3	3e-05
chr1_1	81600000	81700000	0	0
chr1_1	81700000	81800000	0	0
chr1_1	81800000	81900000	0	0
chr1_1	81900000	82000000	9	9e-05
chr1_1	82000000	82100000	28	0.00028
chr1_1	82100000	82200000	8	8e-05
chr1_1	82200000	82300000	0	0
chr1_1	82300000	82400000	0	0
chr1_1	82400000	82500000	0	0
chr1_1	82500000	82600000	6	6e-05
chr1_1	82600000	82700000	22	0.00022
chr1_1	82700000	82800000	0	0
chr1_1	82800000	82900000	15	0.00015
chr1_1	82900000	83000000	16	0.00016
chr1_1	83000000	83100000	29	0.00029
chr1_1	83100000	83200000	7	7e-05
chr1_1	83200000	83300000	0	0
chr1_1	83300000	83400000	6	6e-05
chr1_1	83400000	83500000	1212	0.01212
chr1_1	83500000	83600000	881	0.00881
chr1_1	83600000	83700000	45	0.00045
chr1_1	83700000	83800000	853	0.00853
chr1_1	83800000	83900000	389	0.00389
chr1_1	83900000	84000000	0	0
chr1_1	84000000	84100000	10	0.0001
chr1_1	84100000	84200000	0	0
chr1_1	84200000	84300000	0	0
chr1_1	84300000	84400000	0	0
chr1_1	84400000	84500000	38	0.00038
chr1_1	84500000	84600000	2049	0.02049
chr1_1	84600000	84700000	1821	0.01821
chr1_1	84700000	84800000	979	0.00979
chr1_1	84800000	84900000	9	9e-05
chr1_1	84900000	85000000	0	0
chr1_1	85000000	85100000	0	0
chr1_1	85100000	85200000	1041	0.01041
chr1_1	85200000	85300000	2202	0.02202
chr1_1	85300000	85400000	1801	0.01801
chr1_1	85400000	85500000	2621	0.02621
chr1_1	85500000	85600000	2219	0.02219
chr1_1	85600000	85700000	2536	0.02536
chr1_1	85700000	85800000	2962	0.02962
chr1_1	85800000	85900000	1678	0.01678
chr1_1	85900000	86000000	1805	0.01805
chr1_1	86000000	86100000	1681	0.01681
chr1_1	86100000	86200000	2380	0.0238
chr1_1	86200000	86300000	2340	0.0234
chr1_1	86300000	86400000	1720	0.0172
chr1_1	86400000	86500000	2009	0.02009
chr1_1	86500000	86600000	1871	0.01871
chr1_1	86600000	86700000	2059	0.02059
chr1_1	86700000	86800000	1422	0.01422
chr1_1	86800000	86900000	1374	0.01374
chr1_1	86900000	87000000	1537	0.01537
chr1_1	87000000	87100000	993	0.00993
chr1_1	87100000	87200000	1245	0.01245
chr1_1	87200000	87300000	1261	0.01261
chr1_1	87300000	87400000	1410	0.0141
chr1_1	87400000	87500000	524	0.00524
chr1_1	87500000	87600000	690	0.0069
chr1_1	87600000	87700000	766	0.00766
chr1_1	87700000	87800000	662	0.00662
chr1_1	87800000	87900000	1330	0.0133
chr1_1	87900000	88000000	61	0.00061
chr1_1	88000000	88100000	9	9e-05
chr1_1	88100000	88200000	8	8e-05
chr1_1	88200000	88300000	2	2e-05
chr1_1	88300000	88400000	227	0.00227
chr1_1	88400000	88500000	1401	0.01401
chr1_1	88500000	88600000	1660	0.0166
chr1_1	88600000	88700000	897	0.00897
chr1_1	88700000	88800000	1463	0.01463
chr1_1	88800000	88900000	493	0.00493
chr1_1	88900000	89000000	307	0.00307
chr1_1	89000000	89100000	944	0.00944
chr1_1	89100000	89200000	906	0.00906
chr1_1	89200000	89300000	1374	0.01374
chr1_1	89300000	89400000	372	0.00372
chr1_1	89400000	89500000	461	0.00461
chr1_1	89500000	89600000	518	0.00518
chr1_1	89600000	89700000	243	0.00243
chr1_1	89700000	89800000	12	0.00012
chr1_1	89800000	89900000	4	4e-05
chr1_1	89900000	90000000	141	0.00141
chr1_1	90000000	90100000	485	0.00485
chr1_1	90100000	90200000	974	0.00974
chr1_1	90200000	90300000	962	0.00962
chr1_1	90300000	90400000	1013	0.01013
chr1_1	90400000	90500000	1439	0.01439
chr1_1	90500000	90600000	2322	0.02322
chr1_1	90600000	90700000	1265	0.01265
chr1_1	90700000	90800000	1428	0.01428
chr1_1	90800000	90900000	1953	0.01953
chr1_1	90900000	91000000	2895	0.02895
chr1_1	91000000	91100000	2890	0.0289
chr1_1	91100000	91200000	2171	0.02171
chr1_1	91200000	91300000	2553	0.02553
chr1_1	91300000	91400000	2660	0.0266
chr1_1	91400000	91500000	2106	0.02106
chr1_1	91500000	91600000	2452	0.02452
chr1_1	91600000	91700000	2221	0.02221
chr1_1	91700000	91800000	2020	0.0202
chr1_1	91800000	91900000	2308	0.02308
chr1_1	91900000	92000000	2721	0.02721
chr1_1	92000000	92100000	1632	0.01632
chr1_1	92100000	92200000	2835	0.02835
chr1_1	92200000	92300000	1927	0.01927
chr1_1	92300000	92400000	3429	0.03429
chr1_1	92400000	92500000	2716	0.02716
chr1_1	92500000	92600000	443	0.00443
chr1_1	92600000	92700000	6	6e-05
chr1_1	92700000	92800000	0	0
chr1_1	92800000	92900000	476	0.00476
chr1_1	92900000	93000000	1686	0.01686
chr1_1	93000000	93100000	1506	0.01506
chr1_1	93100000	93200000	1322	0.01322
chr1_1	93200000	93300000	2154	0.02154
chr1_1	93300000	93400000	2573	0.02573
chr1_1	93400000	93500000	3165	0.03165
chr1_1	93500000	93600000	3648	0.03648
chr1_1	93600000	93700000	1942	0.01942
chr1_1	93700000	93800000	2710	0.0271
chr1_1	93800000	93900000	1949	0.01949
chr1_1	93900000	94000000	2188	0.02188
chr1_1	94000000	94100000	2632	0.02632
chr1_1	94100000	94200000	3052	0.03052
chr1_1	94200000	94300000	2522	0.02522
chr1_1	94300000	94400000	2215	0.02215
chr1_1	94400000	94500000	2625	0.02625
chr1_1	94500000	94600000	2929	0.02929
chr1_1	94600000	94700000	2184	0.02184
chr1_1	94700000	94800000	2615	0.02615
chr1_1	94800000	94900000	2373	0.02373
chr1_1	94900000	95000000	3023	0.03023
chr1_1	95000000	95100000	3598	0.03598
chr1_1	95100000	95200000	667	0.00667
chr1_1	95200000	95300000	13	0.00013
chr1_1	95300000	95400000	4	4e-05
chr1_1	95400000	95500000	2666	0.02666
chr1_1	95500000	95600000	2913	0.02913
chr1_1	95600000	95700000	2806	0.02806
chr1_1	95700000	95800000	2098	0.02098
chr1_1	95800000	95900000	2365	0.02365
chr1_1	95900000	96000000	1863	0.01863
chr1_1	96000000	96100000	1926	0.01926
chr1_1	96100000	96200000	2721	0.02721
chr1_1	96200000	96300000	1725	0.01725
chr1_1	96300000	96400000	813	0.00813
chr1_1	96400000	96500000	796	0.00796
chr1_1	96500000	96600000	647	0.00647
chr1_1	96600000	96700000	760	0.0076
chr1_1	96700000	96800000	16	0.00016
chr1_1	96800000	96900000	0	0
chr1_1	96900000	97000000	544	0.00544
chr1_1	97000000	97100000	5	5e-05
chr1_1	97100000	97200000	408	0.00408
chr1_1	97200000	97300000	325	0.00325
chr1_1	97300000	97400000	5	5e-05
chr1_1	97400000	97500000	1153	0.01153
chr1_1	97500000	97600000	1862	0.01862
chr1_1	97600000	97700000	1289	0.01289
chr1_1	97700000	97800000	1842	0.01842
chr1_1	97800000	97900000	1926	0.01926
chr1_1	97900000	98000000	2668	0.02668
chr1_1	98000000	98100000	1341	0.01341
chr1_1	98100000	98200000	1752	0.01752
chr1_1	98200000	98300000	2878	0.02878
chr1_1	98300000	98400000	1885	0.01885
chr1_1	98400000	98500000	2105	0.02105
chr1_1	98500000	98600000	1319	0.01319
chr1_1	98600000	98700000	788	0.00788
chr1_1	98700000	98800000	791	0.00791
chr1_1	98800000	98900000	691	0.00691
chr1_1	98900000	99000000	947	0.00947
chr1_1	99000000	99100000	802	0.00802
chr1_1	99100000	99200000	1266	0.01266
chr1_1	99200000	99300000	767	0.00767
chr1_1	99300000	99400000	767	0.00767
chr1_1	99400000	99471857	419	0.00419
chr1_2	0	100000	45	0.00045
chr1_2	100000	200000	173	0.00173
chr1_2	200000	300000	92	0.00092
chr1_2	300000	400000	42	0.00042
chr1_2	400000	500000	408	0.00408
chr1_2	500000	600000	1222	0.01222
chr1_2	600000	700000	295	0.00295
chr1_2	700000	800000	20	0.0002
chr1_2	800000	900000	22	0.00022
chr1_2	900000	1000000	12	0.00012
chr1_2	1000000	1100000	30	0.0003
chr1_2	1100000	1200000	56	0.00056
chr1_2	1200000	1300000	105	0.00105
chr1_2	1300000	1400000	94	0.00094
chr1_2	1400000	1500000	92	0.00092
chr1_2	1500000	1600000	737	0.00737
chr1_2	1600000	1700000	38	0.00038
chr1_2	1700000	1800000	1131	0.01131
chr1_2	1800000	1900000	1667	0.01667
chr1_2	1900000	2000000	1176	0.01176
chr1_2	2000000	2100000	1713	0.01713
chr1_2	2100000	2200000	1660	0.0166
chr1_2	2200000	2300000	357	0.00357
chr1_2	2300000	2400000	0	0
chr1_2	2400000	2500000	2	2e-05
chr1_2	2500000	2600000	205	0.00205
chr1_2	2600000	2700000	23	0.00023
chr1_2	2700000	2800000	461	0.00461
chr1_2	2800000	2900000	1478	0.01478
chr1_2	2900000	3000000	1770	0.0177
chr1_2	3000000	3100000	1536	0.01536
chr1_2	3100000	3200000	1557	0.01557
chr1_2	3200000	3300000	1852	0.01852
chr1_2	3300000	3400000	1878	0.01878
chr1_2	3400000	3500000	1970	0.0197
chr1_2	3500000	3600000	1031	0.01031
chr1_2	3600000	3700000	3541	0.03541
chr1_2	3700000	3800000	3074	0.03074
chr1_2	3800000	3900000	2450	0.0245
chr1_2	3900000	4000000	2473	0.02473
chr1_2	4000000	4100000	3394	0.03394
chr1_2	4100000	4200000	1302	0.01302
chr1_2	4200000	4300000	2011	0.02011
chr1_2	4300000	4400000	2151	0.02151
chr1_2	4400000	4500000	2671	0.02671
chr1_2	4500000	4600000	2310	0.0231
chr1_2	4600000	4700000	2150	0.0215
chr1_2	4700000	4800000	2801	0.02801
chr1_2	4800000	4900000	2840	0.0284
chr1_2	4900000	5000000	2557	0.02557
chr1_2	5000000	5100000	1779	0.01779
chr1_2	5100000	5200000	2353	0.02353
chr1_2	5200000	5300000	2167	0.02167
chr1_2	5300000	5400000	2360	0.0236
chr1_2	5400000	5500000	3533	0.03533
chr1_2	5500000	5600000	2595	0.02595
chr1_2	5600000	5700000	2930	0.0293
chr1_2	5700000	5800000	1716	0.01716
chr1_2	5800000	5900000	2341	0.02341
chr1_2	5900000	6000000	3267	0.03267
chr1_2	6000000	6100000	2171	0.02171
chr1_2	6100000	6200000	2199	0.02199
chr1_2	6200000	6300000	2648	0.02648
chr1_2	6300000	6400000	2038	0.02038
chr1_2	6400000	6500000	2127	0.02127
chr1_2	6500000	6600000	1781	0.01781
chr1_2	6600000	6700000	3007	0.03007
chr1_2	6700000	6800000	628	0.00628
chr1_2	6800000	6900000	2670	0.0267
chr1_2	6900000	7000000	53	0.00053
chr1_2	7000000	7100000	1280	0.0128
chr1_2	7100000	7200000	2253	0.02253
chr1_2	7200000	7300000	4351	0.04351
chr1_2	7300000	7400000	3455	0.03455
chr1_2	7400000	7500000	2860	0.0286
chr1_2	7500000	7600000	3405	0.03405
chr1_2	7600000	7700000	2484	0.02484
chr1_2	7700000	7800000	2376	0.02376
chr1_2	7800000	7900000	2109	0.02109
chr1_2	7900000	8000000	4664	0.04664
chr1_2	8000000	8100000	4363	0.04363
chr1_2	8100000	8200000	2296	0.02296
chr1_2	8200000	8300000	1456	0.01456
chr1_2	8300000	8400000	1770	0.0177
chr1_2	8400000	8500000	3312	0.03312
chr1_2	8500000	8600000	1740	0.0174
chr1_2	8600000	8700000	1400	0.014
chr1_2	8700000	8800000	1065	0.01065
chr1_2	8800000	8900000	505	0.00505
chr1_2	8900000	9000000	837	0.00837
chr1_2	9000000	9100000	585	0.00585
chr1_2	9100000	9200000	1162	0.01162
chr1_2	9200000	9300000	867	0.00867
chr1_2	9300000	9400000	770	0.0077
chr1_2	9400000	9500000	903	0.00903
chr1_2	9500000	9600000	2408	0.02408
chr1_2	9600000	9700000	1915	0.01915
chr1_2	9700000	9800000	1913	0.01913
chr1_2	9800000	9900000	21	0.00021
chr1_2	9900000	10000000	51	0.00051
chr1_2	10000000	10100000	33	0.00033
chr1_2	10100000	10200000	55	0.00055
chr1_2	10200000	10300000	307	0.00307
chr1_2	10300000	10400000	1	1e-05
chr1_2	10400000	10500000	1075	0.01075
chr1_2	10500000	10600000	3276	0.03276
chr1_2	10600000	10700000	2863	0.02863
chr1_2	10700000	10800000	3132	0.03132
chr1_2	10800000	10900000	3791	0.03791
chr1_2	10900000	11000000	3266	0.03266
chr1_2	11000000	11100000	3261	0.03261
chr1_2	11100000	11200000	3965	0.03965
chr1_2	11200000	11300000	2789	0.02789
chr1_2	11300000	11400000	3194	0.03194
chr1_2	11400000	11500000	3820	0.0382
chr1_2	11500000	11600000	4485	0.04485
chr1_2	11600000	11700000	4670	0.0467
chr1_2	11700000	11800000	2334	0.02334
chr1_2	11800000	11900000	0	0
chr1_2	11900000	12000000	0	0
chr1_2	12000000	12100000	0	0
chr1_2	12100000	12200000	0	0
chr1_2	12200000	12300000	2	2e-05
chr1_2	12300000	12400000	10	0.0001
chr1_2	12400000	12500000	0	0
chr1_2	12500000	12600000	1	1e-05
chr1_2	12600000	12700000	0	0
chr1_2	12700000	12800000	1040	0.0104
chr1_2	12800000	12900000	245	0.00245
chr1_2	12900000	13000000	1076	0.01076
chr1_2	13000000	13100000	110	0.0011
chr1_2	13100000	13200000	1384	0.01384
chr1_2	13200000	13300000	1804	0.01804
chr1_2	13300000	13400000	1689	0.01689
chr1_2	13400000	13500000	938	0.00938
chr1_2	13500000	13600000	1047	0.01047
chr1_2	13600000	13700000	656	0.00656
chr1_2	13700000	13800000	660	0.0066
chr1_2	13800000	13900000	22	0.00022
chr1_2	13900000	14000000	22	0.00022
chr1_2	14000000	14100000	84	0.00084
chr1_2	14100000	14200000	18	0.00018
chr1_2	14200000	14300000	42	0.00042
chr1_2	14300000	14400000	27	0.00027
chr1_2	14400000	14500000	59	0.00059
chr1_2	14500000	14600000	25	0.00025
chr1_2	14600000	14700000	134	0.00134
chr1_2	14700000	14800000	7	7e-05
chr1_2	14800000	14900000	24	0.00024
chr1_2	14900000	15000000	23	0.00023
chr1_2	15000000	15100000	382	0.00382
chr1_2	15100000	15200000	1927	0.01927
chr1_2	15200000	15300000	1816	0.01816
chr1_2	15300000	15400000	2248	0.02248
chr1_2	15400000	15500000	2645	0.02645
chr1_2	15500000	15600000	384	0.00384
chr1_2	15600000	15700000	53	0.00053
chr1_2	15700000	15800000	22	0.00022
chr1_2	15800000	15900000	840	0.0084
chr1_2	15900000	16000000	3510	0.0351
chr1_2	16000000	16100000	3112	0.03112
chr1_2	16100000	16200000	2437	0.02437
chr1_2	16200000	16300000	2310	0.0231
chr1_2	16300000	16400000	2841	0.02841
chr1_2	16400000	16500000	3315	0.03315
chr1_2	16500000	16600000	3923	0.03923
chr1_2	16600000	16700000	4679	0.04679
chr1_2	16700000	16800000	5728	0.05728
chr1_2	16800000	16900000	4053	0.04053
chr1_2	16900000	17000000	3015	0.03015
chr1_2	17000000	17100000	3017	0.03017
chr1_2	17100000	17200000	3579	0.03579
chr1_2	17200000	17300000	1805	0.01805
chr1_2	17300000	17400000	2537	0.02537
chr1_2	17400000	17500000	2437	0.02437
chr1_2	17500000	17600000	2283	0.02283
chr1_2	17600000	17700000	2324	0.02324
chr1_2	17700000	17800000	2024	0.02024
chr1_2	17800000	17900000	821	0.00821
chr1_2	17900000	18000000	1254	0.01254
chr1_2	18000000	18100000	2344	0.02344
chr1_2	18100000	18200000	3878	0.03878
chr1_2	18200000	18300000	3944	0.03944
chr1_2	18300000	18400000	2858	0.02858
chr1_2	18400000	18500000	3318	0.03318
chr1_2	18500000	18600000	3017	0.03017
chr1_2	18600000	18700000	2907	0.02907
chr1_2	18700000	18800000	2624	0.02624
chr1_2	18800000	18900000	2909	0.02909
chr1_2	18900000	19000000	2227	0.02227
chr1_2	19000000	19100000	3883	0.03883
chr1_2	19100000	19200000	2845	0.02845
chr1_2	19200000	19300000	3963	0.03963
chr1_2	19300000	19400000	2562	0.02562
chr1_2	19400000	19500000	4363	0.04363
chr1_2	19500000	19600000	2579	0.02579
chr1_2	19600000	19700000	2212	0.02212
chr1_2	19700000	19800000	4612	0.04612
chr1_2	19800000	19900000	3697	0.03697
chr1_2	19900000	20000000	1994	0.01994
chr1_2	20000000	20100000	1596	0.01596
chr1_2	20100000	20200000	3461	0.03461
chr1_2	20200000	20300000	4026	0.04026
chr1_2	20300000	20400000	2395	0.02395
chr1_2	20400000	20500000	4300	0.043
chr1_2	20500000	20600000	4866	0.04866
chr1_2	20600000	20700000	5657	0.05657
chr1_2	20700000	20800000	3640	0.0364
chr1_2	20800000	20900000	3523	0.03523
chr1_2	20900000	21000000	3529	0.03529
chr1_2	21000000	21100000	1763	0.01763
chr1_2	21100000	21200000	3350	0.0335
chr1_2	21200000	21300000	2315	0.02315
chr1_2	21300000	21400000	1717	0.01717
chr1_2	21400000	21500000	3115	0.03115
chr1_2	21500000	21600000	2201	0.02201
chr1_2	21600000	21700000	2889	0.02889
chr1_2	21700000	21800000	3961	0.03961
chr1_2	21800000	21900000	4661	0.04661
chr1_2	21900000	22000000	3571	0.03571
chr1_2	22000000	22100000	2100	0.021
chr1_2	22100000	22200000	3422	0.03422
chr1_2	22200000	22300000	3834	0.03834
chr1_2	22300000	22400000	2850	0.0285
chr1_2	22400000	22500000	3425	0.03425
chr1_2	22500000	22600000	1978	0.01978
chr1_2	22600000	22700000	3641	0.03641
chr1_2	22700000	22800000	3946	0.03946
chr1_2	22800000	22900000	5245	0.05245
chr1_2	22900000	23000000	2462	0.02462
chr1_2	23000000	23100000	1827	0.01827
chr1_2	23100000	23200000	3336	0.03336
chr1_2	23200000	23300000	2246	0.02246
chr1_2	23300000	23400000	1348	0.01348
chr1_2	23400000	23500000	2471	0.02471
chr1_2	23500000	23600000	4190	0.0419
chr1_2	23600000	23700000	2110	0.0211
chr1_2	23700000	23800000	4350	0.0435
chr1_2	23800000	23900000	2586	0.02586
chr1_2	23900000	24000000	1481	0.01481
chr1_2	24000000	24100000	1419	0.01419
chr1_2	24100000	24200000	1616	0.01616
chr1_2	24200000	24300000	2335	0.02335
chr1_2	24300000	24400000	2433	0.02433
chr1_2	24400000	24500000	1904	0.01904
chr1_2	24500000	24600000	2797	0.02797
chr1_2	24600000	24700000	3117	0.03117
chr1_2	24700000	24800000	2248	0.02248
chr1_2	24800000	24900000	2048	0.02048
chr1_2	24900000	25000000	3303	0.03303
chr1_2	25000000	25100000	3269	0.03269
chr1_2	25100000	25200000	1484	0.01484
chr1_2	25200000	25300000	2549	0.02549
chr1_2	25300000	25400000	2180	0.0218
chr1_2	25400000	25500000	1632	0.01632
chr1_2	25500000	25600000	2306	0.02306
chr1_2	25600000	25700000	2107	0.02107
chr1_2	25700000	25800000	3083	0.03083
chr1_2	25800000	25900000	2091	0.02091
chr1_2	25900000	26000000	2481	0.02481
chr1_2	26000000	26100000	1859	0.01859
chr1_2	26100000	26200000	3049	0.03049
chr1_2	26200000	26300000	1901	0.01901
chr1_2	26300000	26400000	2435	0.02435
chr1_2	26400000	26500000	2266	0.02266
chr1_2	26500000	26600000	2400	0.024
chr1_2	26600000	26700000	2190	0.0219
chr1_2	26700000	26800000	3021	0.03021
chr1_2	26800000	26900000	3190	0.0319
chr1_2	26900000	27000000	2371	0.02371
chr1_2	27000000	27100000	2112	0.02112
chr1_2	27100000	27200000	2356	0.02356
chr1_2	27200000	27300000	1804	0.01804
chr1_2	27300000	27400000	1570	0.0157
chr1_2	27400000	27500000	2111	0.02111
chr1_2	27500000	27600000	1874	0.01874
chr1_2	27600000	27700000	1116	0.01116
chr1_2	27700000	27800000	1890	0.0189
chr1_2	27800000	27900000	1754	0.01754
chr1_2	27900000	28000000	1125	0.01125
chr1_2	28000000	28100000	1025	0.01025
chr1_2	28100000	28200000	1374	0.01374
chr1_2	28200000	28300000	1505	0.01505
chr1_2	28300000	28400000	877	0.00877
chr1_2	28400000	28500000	398	0.00398
chr1_2	28500000	28600000	1358	0.01358
chr1_2	28600000	28700000	1496	0.01496
chr1_2	28700000	28800000	1539	0.01539
chr1_2	28800000	28900000	1781	0.01781
chr1_2	28900000	29000000	942	0.00942
chr1_2	29000000	29100000	2122	0.02122
chr1_2	29100000	29200000	1646	0.01646
chr1_2	29200000	29300000	2612	0.02612
chr1_2	29300000	29400000	2886	0.02886
chr1_2	29400000	29500000	2930	0.0293
chr1_2	29500000	29600000	2786	0.02786
chr1_2	29600000	29700000	2181	0.02181
chr1_2	29700000	29800000	2592	0.02592
chr1_2	29800000	29900000	3873	0.03873
chr1_2	29900000	30000000	2838	0.02838
chr1_2	30000000	30100000	2335	0.02335
chr1_2	30100000	30200000	1321	0.01321
chr1_2	30200000	30300000	292	0.00292
chr1_2	30300000	30400000	21	0.00021
chr1_2	30400000	30500000	514	0.00514
chr1_2	30500000	30600000	211	0.00211
chr1_2	30600000	30700000	227	0.00227
chr1_2	30700000	30800000	87	0.00087
chr1_2	30800000	30900000	51	0.00051
chr1_2	30900000	31000000	68	0.00068
chr1_2	31000000	31100000	35	0.00035
chr1_2	31100000	31200000	1	1e-05
chr1_2	31200000	31300000	1	1e-05
chr1_2	31300000	31400000	1	1e-05
chr1_2	31400000	31500000	0	0
chr1_2	31500000	31600000	3	3e-05
chr1_2	31600000	31700000	0	0
chr1_2	31700000	31800000	0	0
chr1_2	31800000	31900000	2079	0.02079
chr1_2	31900000	32000000	3198	0.03198
chr1_2	32000000	32100000	5016	0.05016
chr1_2	32100000	32200000	3298	0.03298
chr1_2	32200000	32300000	2031	0.02031
chr1_2	32300000	32400000	4259	0.04259
chr1_2	32400000	32500000	2478	0.02478
chr1_2	32500000	32600000	4173	0.04173
chr1_2	32600000	32700000	4881	0.04881
chr1_2	32700000	32800000	4767	0.04767
chr1_2	32800000	32900000	3247	0.03247
chr1_2	32900000	33000000	3526	0.03526
chr1_2	33000000	33100000	3512	0.03512
chr1_2	33100000	33200000	3615	0.03615
chr1_2	33200000	33300000	3703	0.03703
chr1_2	33300000	33400000	4550	0.0455
chr1_2	33400000	33500000	3974	0.03974
chr1_2	33500000	33600000	2451	0.02451
chr1_2	33600000	33700000	4740	0.0474
chr1_2	33700000	33800000	4853	0.04853
chr1_2	33800000	33900000	2757	0.02757
chr1_2	33900000	34000000	3453	0.03453
chr1_2	34000000	34100000	4805	0.04805
chr1_2	34100000	34200000	6351	0.06351
chr1_2	34200000	34300000	3315	0.03315
chr1_2	34300000	34400000	3544	0.03544
chr1_2	34400000	34500000	4206	0.04206
chr1_2	34500000	34600000	2903	0.02903
chr1_2	34600000	34700000	2302	0.02302
chr1_2	34700000	34800000	5278	0.05278
chr1_2	34800000	34900000	4184	0.04184
chr1_2	34900000	35000000	5871	0.05871
chr1_2	35000000	35100000	3387	0.03387
chr1_2	35100000	35200000	6507	0.06507
chr1_2	35200000	35300000	5670	0.0567
chr1_2	35300000	35400000	6026	0.06026
chr1_2	35400000	35500000	4587	0.04587
chr1_2	35500000	35600000	7115	0.07115
chr1_2	35600000	35700000	6377	0.06377
chr1_2	35700000	35800000	6166	0.06166
chr1_2	35800000	35900000	4903	0.04903
chr1_2	35900000	36000000	3663	0.03663
chr1_2	36000000	36100000	3594	0.03594
chr1_2	36100000	36200000	4429	0.04429
chr1_2	36200000	36300000	2818	0.02818
chr1_2	36300000	36400000	5428	0.05428
chr1_2	36400000	36500000	4969	0.04969
chr1_2	36500000	36600000	7042	0.07042
chr1_2	36600000	36700000	4531	0.04531
chr1_2	36700000	36800000	2226	0.02226
chr1_2	36800000	36900000	1980	0.0198
chr1_2	36900000	37000000	4435	0.04435
chr1_2	37000000	37100000	3297	0.03297
chr1_2	37100000	37200000	4571	0.04571
chr1_2	37200000	37300000	6413	0.06413
chr1_2	37300000	37400000	2872	0.02872
chr1_2	37400000	37500000	5639	0.05639
chr1_2	37500000	37600000	3547	0.03547
chr1_2	37600000	37700000	3965	0.03965
chr1_2	37700000	37800000	2137	0.02137
chr1_2	37800000	37900000	1525	0.01525
chr1_2	37900000	38000000	2624	0.02624
chr1_2	38000000	38100000	1388	0.01388
chr1_2	38100000	38200000	2396	0.02396
chr1_2	38200000	38300000	3133	0.03133
chr1_2	38300000	38400000	3332	0.03332
chr1_2	38400000	38500000	1617	0.01617
chr1_2	38500000	38600000	1511	0.01511
chr1_2	38600000	38700000	1263	0.01263
chr1_2	38700000	38800000	725	0.00725
chr1_2	38800000	38900000	4194	0.04194
chr1_2	38900000	39000000	4313	0.04313
chr1_2	39000000	39100000	3724	0.03724
chr1_2	39100000	39200000	3126	0.03126
chr1_2	39200000	39300000	4107	0.04107
chr1_2	39300000	39400000	3829	0.03829
chr1_2	39400000	39500000	4838	0.04838
chr1_2	39500000	39600000	4685	0.04685
chr1_2	39600000	39700000	5313	0.05313
chr1_2	39700000	39800000	4352	0.04352
chr1_2	39800000	39900000	3635	0.03635
chr1_2	39900000	40000000	3651	0.03651
chr1_2	40000000	40100000	1776	0.01776
chr1_2	40100000	40200000	1679	0.01679
chr1_2	40200000	40300000	3223	0.03223
chr1_2	40300000	40400000	4061	0.04061
chr1_2	40400000	40500000	5399	0.05399
chr1_2	40500000	40600000	3308	0.03308
chr1_2	40600000	40700000	5831	0.05831
chr1_2	40700000	40800000	5285	0.05285
chr1_2	40800000	40900000	2101	0.02101
chr1_2	40900000	41000000	1014	0.01014
chr1_2	41000000	41100000	1368	0.01368
chr1_2	41100000	41200000	2153	0.02153
chr1_2	41200000	41300000	834	0.00834
chr1_2	41300000	41400000	1122	0.01122
chr1_2	41400000	41500000	2658	0.02658
chr1_2	41500000	41600000	2004	0.02004
chr1_2	41600000	41700000	1256	0.01256
chr1_2	41700000	41800000	469	0.00469
chr1_2	41800000	41900000	922	0.00922
chr1_2	41900000	42000000	323	0.00323
chr1_2	42000000	42100000	914	0.00914
chr1_2	42100000	42200000	949	0.00949
chr1_2	42200000	42300000	1251	0.01251
chr1_2	42300000	42400000	2136	0.02136
chr1_2	42400000	42500000	4553	0.04553
chr1_2	42500000	42600000	1042	0.01042
chr1_2	42600000	42700000	1135	0.01135
chr1_2	42700000	42800000	612	0.00612
chr1_2	42800000	42900000	1283	0.01283
chr1_2	42900000	43000000	4097	0.04097
chr1_2	43000000	43100000	2996	0.02996
chr1_2	43100000	43200000	893	0.00893
chr1_2	43200000	43300000	1084	0.01084
chr1_2	43300000	43400000	511	0.00511
chr1_2	43400000	43500000	242	0.00242
chr1_2	43500000	43600000	1405	0.01405
chr1_2	43600000	43700000	913	0.00913
chr1_2	43700000	43800000	1400	0.014
chr1_2	43800000	43900000	1334	0.01334
chr1_2	43900000	44000000	865	0.00865
chr1_2	44000000	44100000	1551	0.01551
chr1_2	44100000	44200000	586	0.00586
chr1_2	44200000	44300000	1012	0.01012
chr1_2	44300000	44400000	904	0.00904
chr1_2	44400000	44500000	1300	0.013
chr1_2	44500000	44600000	1831	0.01831
chr1_2	44600000	44700000	3388	0.03388
chr1_2	44700000	44800000	4082	0.04082
chr1_2	44800000	44900000	3461	0.03461
chr1_2	44900000	45000000	5948	0.05948
chr1_2	45000000	45100000	4909	0.04909
chr1_2	45100000	45200000	3173	0.03173
chr1_2	45200000	45300000	2909	0.02909
chr1_2	45300000	45400000	3072	0.03072
chr1_2	45400000	45500000	7320	0.0732
chr1_2	45500000	45600000	6005	0.06005
chr1_2	45600000	45700000	3935	0.03935
chr1_2	45700000	45800000	7646	0.07646
chr1_2	45800000	45900000	5760	0.0576
chr1_2	45900000	46000000	3800	0.038
chr1_2	46000000	46100000	4213	0.04213
chr1_2	46100000	46200000	8405	0.08405
chr1_2	46200000	46300000	5887	0.05887
chr1_2	46300000	46400000	3395	0.03395
chr1_2	46400000	46500000	4569	0.04569
chr1_2	46500000	46600000	4761	0.04761
chr1_2	46600000	46700000	4291	0.04291
chr1_2	46700000	46800000	6906	0.06906
chr1_2	46800000	46900000	7611	0.07611
chr1_2	46900000	47000000	5820	0.0582
chr1_2	47000000	47100000	4798	0.04798
chr1_2	47100000	47200000	6587	0.06587
chr1_2	47200000	47300000	3822	0.03822
chr1_2	47300000	47400000	5972	0.05972
chr1_2	47400000	47500000	3777	0.03777
chr1_2	47500000	47600000	5216	0.05216
chr1_2	47600000	47700000	2854	0.02854
chr1_2	47700000	47800000	2226	0.02226
chr1_2	47800000	47900000	4046	0.04046
chr1_2	47900000	48000000	2565	0.02565
chr1_2	48000000	48100000	4245	0.04245
chr1_2	48100000	48200000	4968	0.04968
chr1_2	48200000	48300000	4392	0.04392
chr1_2	48300000	48400000	2161	0.02161
chr1_2	48400000	48500000	2329	0.02329
chr1_2	48500000	48600000	2914	0.02914
chr1_2	48600000	48700000	2911	0.02911
chr1_2	48700000	48800000	3282	0.03282
chr1_2	48800000	48900000	1425	0.01425
chr1_2	48900000	49000000	1552	0.01552
chr1_2	49000000	49100000	2851	0.02851
chr1_2	49100000	49200000	2712	0.02712
chr1_2	49200000	49300000	1381	0.01381
chr1_2	49300000	49400000	1097	0.01097
chr1_2	49400000	49500000	1294	0.01294
chr1_2	49500000	49600000	1332	0.01332
chr1_2	49600000	49700000	1479	0.01479
chr1_2	49700000	49800000	4709	0.04709
chr1_2	49800000	49900000	6069	0.06069
chr1_2	49900000	50000000	5539	0.05539
chr1_2	50000000	50100000	2463	0.02463
chr1_2	50100000	50200000	2651	0.02651
chr1_2	50200000	50300000	4763	0.04763
chr1_2	50300000	50400000	4099	0.04099
chr1_2	50400000	50500000	3122	0.03122
chr1_2	50500000	50600000	5053	0.05053
chr1_2	50600000	50700000	2039	0.02039
chr1_2	50700000	50800000	3904	0.03904
chr1_2	50800000	50900000	2444	0.02444
chr1_2	50900000	51000000	2411	0.02411
chr1_2	51000000	51100000	3891	0.03891
chr1_2	51100000	51200000	3250	0.0325
chr1_2	51200000	51300000	3047	0.03047
chr1_2	51300000	51400000	2593	0.02593
chr1_2	51400000	51500000	2543	0.02543
chr1_2	51500000	51600000	2425	0.02425
chr1_2	51600000	51700000	4263	0.04263
chr1_2	51700000	51800000	2579	0.02579
chr1_2	51800000	51900000	3177	0.03177
chr1_2	51900000	52000000	2955	0.02955
chr1_2	52000000	52100000	2636	0.02636
chr1_2	52100000	52200000	2779	0.02779
chr1_2	52200000	52300000	2461	0.02461
chr1_2	52300000	52400000	4167	0.04167
chr1_2	52400000	52500000	1943	0.01943
chr1_2	52500000	52600000	2452	0.02452
chr1_2	52600000	52700000	1592	0.01592
chr1_2	52700000	52800000	2047	0.02047
chr1_2	52800000	52900000	1378	0.01378
chr1_2	52900000	53000000	3109	0.03109
chr1_2	53000000	53100000	3418	0.03418
chr1_2	53100000	53200000	2811	0.02811
chr1_2	53200000	53300000	2715	0.02715
chr1_2	53300000	53400000	2621	0.02621
chr1_2	53400000	53500000	2358	0.02358
chr1_2	53500000	53600000	3305	0.03305
chr1_2	53600000	53700000	2897	0.02897
chr1_2	53700000	53800000	3225	0.03225
chr1_2	53800000	53900000	1930	0.0193
chr1_2	53900000	54000000	2349	0.02349
chr1_2	54000000	54100000	2737	0.02737
chr1_2	54100000	54200000	2390	0.0239
chr1_2	54200000	54300000	3135	0.03135
chr1_2	54300000	54400000	1685	0.01685
chr1_2	54400000	54500000	2705	0.02705
chr1_2	54500000	54600000	3157	0.03157
chr1_2	54600000	54700000	2778	0.02778
chr1_2	54700000	54800000	2939	0.02939
chr1_2	54800000	54900000	3452	0.03452
chr1_2	54900000	55000000	3746	0.03746
chr1_2	55000000	55100000	2943	0.02943
chr1_2	55100000	55200000	3371	0.03371
chr1_2	55200000	55300000	3366	0.03366
chr1_2	55300000	55400000	2004	0.02004
chr1_2	55400000	55500000	3163	0.03163
chr1_2	55500000	55600000	3733	0.03733
chr1_2	55600000	55700000	2766	0.02766
chr1_2	55700000	55800000	1322	0.01322
chr1_2	55800000	55900000	2737	0.02737
chr1_2	55900000	56000000	2958	0.02958
chr1_2	56000000	56100000	3579	0.03579
chr1_2	56100000	56200000	3371	0.03371
chr1_2	56200000	56300000	2032	0.02032
chr1_2	56300000	56400000	4641	0.04641
chr1_2	56400000	56500000	2419	0.02419
chr1_2	56500000	56600000	3500	0.035
chr1_2	56600000	56700000	4880	0.0488
chr1_2	56700000	56800000	4176	0.04176
chr1_2	56800000	56900000	2435	0.02435
chr1_2	56900000	57000000	2873	0.02873
chr1_2	57000000	57100000	3223	0.03223
chr1_2	57100000	57200000	2592	0.02592
chr1_2	57200000	57300000	3849	0.03849
chr1_2	57300000	57400000	4719	0.04719
chr1_2	57400000	57500000	2046	0.02046
chr1_2	57500000	57600000	3101	0.03101
chr1_2	57600000	57700000	2637	0.02637
chr1_2	57700000	57800000	3033	0.03033
chr1_2	57800000	57900000	4464	0.04464
chr1_2	57900000	58000000	2546	0.02546
chr1_2	58000000	58100000	2705	0.02705
chr1_2	58100000	58200000	4347	0.04347
chr1_2	58200000	58300000	2802	0.02802
chr1_2	58300000	58400000	2338	0.02338
chr1_2	58400000	58500000	1293	0.01293
chr1_2	58500000	58600000	3860	0.0386
chr1_2	58600000	58700000	3038	0.03038
chr1_2	58700000	58800000	2538	0.02538
chr1_2	58800000	58900000	2045	0.02045
chr1_2	58900000	59000000	5113	0.05113
chr1_2	59000000	59100000	3909	0.03909
chr1_2	59100000	59200000	3399	0.03399
chr1_2	59200000	59300000	4212	0.04212
chr1_2	59300000	59400000	3404	0.03404
chr1_2	59400000	59500000	4051	0.04051
chr1_2	59500000	59600000	2978	0.02978
chr1_2	59600000	59700000	3658	0.03658
chr1_2	59700000	59800000	3897	0.03897
chr1_2	59800000	59900000	3747	0.03747
chr1_2	59900000	60000000	2918	0.02918
chr1_2	60000000	60100000	2113	0.02113
chr1_2	60100000	60200000	2292	0.02292
chr1_2	60200000	60300000	7846	0.07846
chr1_2	60300000	60400000	7145	0.07145
chr1_2	60400000	60500000	2968	0.02968
chr1_2	60500000	60600000	3897	0.03897
chr1_2	60600000	60700000	4349	0.04349
chr1_2	60700000	60800000	4982	0.04982
chr1_2	60800000	60900000	5330	0.0533
chr1_2	60900000	61000000	5364	0.05364
chr1_2	61000000	61100000	6449	0.06449
chr1_2	61100000	61200000	3970	0.0397
chr1_2	61200000	61300000	3788	0.03788
chr1_2	61300000	61400000	2244	0.02244
chr1_2	61400000	61500000	2499	0.02499
chr1_2	61500000	61600000	1375	0.01375
chr1_2	61600000	61700000	3420	0.0342
chr1_2	61700000	61800000	4105	0.04105
chr1_2	61800000	61900000	2345	0.02345
chr1_2	61900000	62000000	2818	0.02818
chr1_2	62000000	62100000	3411	0.03411
chr1_2	62100000	62200000	5213	0.05213
chr1_2	62200000	62300000	1142	0.01142
chr1_2	62300000	62400000	947	0.00947
chr1_2	62400000	62500000	1256	0.01256
chr1_2	62500000	62600000	1683	0.01683
chr1_2	62600000	62700000	1793	0.01793
chr1_2	62700000	62800000	830	0.0083
chr1_2	62800000	62900000	3343	0.03343
chr1_2	62900000	63000000	3999	0.03999
chr1_2	63000000	63100000	3371	0.03371
chr1_2	63100000	63200000	2912	0.02912
chr1_2	63200000	63300000	3840	0.0384
chr1_2	63300000	63400000	3324	0.03324
chr1_2	63400000	63500000	3809	0.03809
chr1_2	63500000	63600000	1866	0.01866
chr1_2	63600000	63700000	1161	0.01161
chr1_2	63700000	63800000	2304	0.02304
chr1_2	63800000	63900000	2741	0.02741
chr1_2	63900000	64000000	48	0.00048
chr1_2	64000000	64100000	12	0.00012
chr1_2	64100000	64200000	1777	0.01777
chr1_2	64200000	64300000	4749	0.04749
chr1_2	64300000	64400000	2712	0.02712
chr1_2	64400000	64500000	2905	0.02905
chr1_2	64500000	64600000	2549	0.02549
chr1_2	64600000	64700000	2128	0.02128
chr1_2	64700000	64800000	2599	0.02599
chr1_2	64800000	64900000	2248	0.02248
chr1_2	64900000	65000000	1814	0.01814
chr1_2	65000000	65100000	1644	0.01644
chr1_2	65100000	65200000	3130	0.0313
chr1_2	65200000	65300000	3254	0.03254
chr1_2	65300000	65400000	3934	0.03934
chr1_2	65400000	65500000	4377	0.04377
chr1_2	65500000	65600000	2823	0.02823
chr1_2	65600000	65700000	3297	0.03297
chr1_2	65700000	65800000	3945	0.03945
chr1_2	65800000	65900000	5534	0.05534
chr1_2	65900000	66000000	3303	0.03303
chr1_2	66000000	66100000	2160	0.0216
chr1_2	66100000	66200000	2743	0.02743
chr1_2	66200000	66300000	3782	0.03782
chr1_2	66300000	66400000	3112	0.03112
chr1_2	66400000	66500000	3797	0.03797
chr1_2	66500000	66600000	2176	0.02176
chr1_2	66600000	66700000	3121	0.03121
chr1_2	66700000	66800000	1909	0.01909
chr1_2	66800000	66900000	4253	0.04253
chr1_2	66900000	67000000	3510	0.0351
chr1_2	67000000	67100000	1827	0.01827
chr1_2	67100000	67200000	2143	0.02143
chr1_2	67200000	67300000	1800	0.018
chr1_2	67300000	67400000	1731	0.01731
chr1_2	67400000	67500000	1756	0.01756
chr1_2	67500000	67600000	2071	0.02071
chr1_2	67600000	67700000	4223	0.04223
chr1_2	67700000	67800000	2651	0.02651
chr1_2	67800000	67900000	2706	0.02706
chr1_2	67900000	68000000	2696	0.02696
chr1_2	68000000	68100000	2860	0.0286
chr1_2	68100000	68200000	1491	0.01491
chr1_2	68200000	68300000	1181	0.01181
chr1_2	68300000	68400000	2368	0.02368
chr1_2	68400000	68500000	1250	0.0125
chr1_2	68500000	68600000	201	0.00201
chr1_2	68600000	68700000	94	0.00094
chr1_2	68700000	68800000	0	0
chr1_2	68800000	68900000	30	0.0003
chr1_2	68900000	69000000	19	0.00019
chr1_2	69000000	69100000	296	0.00296
chr1_2	69100000	69200000	993	0.00993
chr1_2	69200000	69300000	41	0.00041
chr1_2	69300000	69400000	5	5e-05
chr1_2	69400000	69500000	0	0
chr1_2	69500000	69600000	0	0
chr1_2	69600000	69700000	0	0
chr1_2	69700000	69800000	0	0
chr1_2	69800000	69900000	0	0
chr1_2	69900000	70000000	14	0.00014
chr1_2	70000000	70100000	823	0.00823
chr1_2	70100000	70200000	30	0.0003
chr1_2	70200000	70300000	0	0
chr1_2	70300000	70400000	0	0
chr1_2	70400000	70500000	440	0.0044
chr1_2	70500000	70600000	477	0.00477
chr1_2	70600000	70700000	1122	0.01122
chr1_2	70700000	70800000	834	0.00834
chr1_2	70800000	70900000	1209	0.01209
chr1_2	70900000	71000000	1393	0.01393
chr1_2	71000000	71100000	737	0.00737
chr1_2	71100000	71200000	2976	0.02976
chr1_2	71200000	71300000	2241	0.02241
chr1_2	71300000	71400000	1522	0.01522
chr1_2	71400000	71500000	1256	0.01256
chr1_2	71500000	71600000	1278	0.01278
chr1_2	71600000	71700000	1146	0.01146
chr1_2	71700000	71800000	659	0.00659
chr1_2	71800000	71900000	1298	0.01298
chr1_2	71900000	72000000	1822	0.01822
chr1_2	72000000	72100000	993	0.00993
chr1_2	72100000	72200000	562	0.00562
chr1_2	72200000	72300000	651	0.00651
chr1_2	72300000	72400000	795	0.00795
chr1_2	72400000	72500000	860	0.0086
chr1_2	72500000	72600000	1096	0.01096
chr1_2	72600000	72700000	0	0
chr1_2	72700000	72800000	0	0
chr1_2	72800000	72900000	0	0
chr1_2	72900000	73000000	15	0.00015
chr1_2	73000000	73100000	145	0.00145
chr1_2	73100000	73200000	2037	0.02037
chr1_2	73200000	73300000	583	0.00583
chr1_2	73300000	73400000	14	0.00014
chr1_2	73400000	73500000	5	5e-05
chr1_2	73500000	73600000	1153	0.01153
chr1_2	73600000	73700000	1329	0.01329
chr1_2	73700000	73800000	461	0.00461
chr1_2	73800000	73900000	346	0.00346
chr1_2	73900000	74000000	27	0.00027
chr1_2	74000000	74100000	1533	0.01533
chr1_2	74100000	74200000	2195	0.02195
chr1_2	74200000	74300000	791	0.00791
chr1_2	74300000	74400000	1421	0.01421
chr1_2	74400000	74500000	764	0.00764
chr1_2	74500000	74600000	6	6e-05
chr1_2	74600000	74700000	89	0.00089
chr1_2	74700000	74800000	792	0.00792
chr1_2	74800000	74900000	1958	0.01958
chr1_2	74900000	75000000	828	0.00828
chr1_2	75000000	75100000	1116	0.01116
chr1_2	75100000	75200000	0	0
chr1_2	75200000	75300000	1454	0.01454
chr1_2	75300000	75400000	1725	0.01725
chr1_2	75400000	75500000	1942	0.01942
chr1_2	75500000	75600000	1867	0.01867
chr1_2	75600000	75700000	1276	0.01276
chr1_2	75700000	75800000	1494	0.01494
chr1_2	75800000	75900000	1180	0.0118
chr1_2	75900000	76000000	1400	0.014
chr1_2	76000000	76100000	1253	0.01253
chr1_2	76100000	76200000	1734	0.01734
chr1_2	76200000	76300000	1995	0.01995
chr1_2	76300000	76400000	2447	0.02447
chr1_2	76400000	76500000	2427	0.02427
chr1_2	76500000	76600000	2145	0.02145
chr1_2	76600000	76700000	2287	0.02287
chr1_2	76700000	76800000	1866	0.01866
chr1_2	76800000	76900000	1612	0.01612
chr1_2	76900000	77000000	2297	0.02297
chr1_2	77000000	77100000	2238	0.02238
chr1_2	77100000	77200000	2618	0.02618
chr1_2	77200000	77300000	2288	0.02288
chr1_2	77300000	77400000	2448	0.02448
chr1_2	77400000	77500000	2295	0.02295
chr1_2	77500000	77600000	2090	0.0209
chr1_2	77600000	77700000	1868	0.01868
chr1_2	77700000	77800000	1373	0.01373
chr1_2	77800000	77900000	2122	0.02122
chr1_2	77900000	78000000	1897	0.01897
chr1_2	78000000	78100000	1474	0.01474
chr1_2	78100000	78200000	1869	0.01869
chr1_2	78200000	78300000	1202	0.01202
chr1_2	78300000	78400000	1496	0.01496
chr1_2	78400000	78500000	1007	0.01007
chr1_2	78500000	78600000	1161	0.01161
chr1_2	78600000	78700000	1404	0.01404
chr1_2	78700000	78800000	2094	0.02094
chr1_2	78800000	78900000	705	0.00705
chr1_2	78900000	79000000	2063	0.02063
chr1_2	79000000	79100000	2346	0.02346
chr1_2	79100000	79200000	1982	0.01982
chr1_2	79200000	79300000	1775	0.01775
chr1_2	79300000	79400000	3312	0.03312
chr1_2	79400000	79500000	4676	0.04676
chr1_2	79500000	79600000	3650	0.0365
chr1_2	79600000	79700000	3906	0.03906
chr1_2	79700000	79800000	2381	0.02381
chr1_2	79800000	79900000	2331	0.02331
chr1_2	79900000	80000000	556	0.00556
chr1_2	80000000	80100000	439	0.00439
chr1_2	80100000	80200000	2220	0.0222
chr1_2	80200000	80300000	662	0.00662
chr1_2	80300000	80400000	1415	0.01415
chr1_2	80400000	80500000	1933	0.01933
chr1_2	80500000	80600000	1674	0.01674
chr1_2	80600000	80700000	366	0.00366
chr1_2	80700000	80800000	1841	0.01841
chr1_2	80800000	80900000	2031	0.02031
chr1_2	80900000	81000000	2774	0.02774
chr1_2	81000000	81100000	3137	0.03137
chr1_2	81100000	81200000	3200	0.032
chr1_2	81200000	81300000	2983	0.02983
chr1_2	81300000	81400000	2686	0.02686
chr1_2	81400000	81500000	2013	0.02013
chr1_2	81500000	81600000	2761	0.02761
chr1_2	81600000	81700000	2390	0.0239
chr1_2	81700000	81800000	3434	0.03434
chr1_2	81800000	81900000	1698	0.01698
chr1_2	81900000	82000000	3297	0.03297
chr1_2	82000000	82100000	2162	0.02162
chr1_2	82100000	82200000	1762	0.01762
chr1_2	82200000	82300000	2457	0.02457
chr1_2	82300000	82400000	2318	0.02318
chr1_2	82400000	82500000	1544	0.01544
chr1_2	82500000	82600000	2109	0.02109
chr1_2	82600000	82700000	2144	0.02144
chr1_2	82700000	82800000	2659	0.02659
chr1_2	82800000	82900000	2809	0.02809
chr1_2	82900000	83000000	2711	0.02711
chr1_2	83000000	83100000	2872	0.02872
chr1_2	83100000	83200000	3004	0.03004
chr1_2	83200000	83300000	2140	0.0214
chr1_2	83300000	83400000	2483	0.02483
chr1_2	83400000	83500000	2212	0.02212
chr1_2	83500000	83600000	2323	0.02323
chr1_2	83600000	83700000	2409	0.02409
chr1_2	83700000	83800000	1803	0.01803
chr1_2	83800000	83900000	2228	0.02228
chr1_2	83900000	84000000	2407	0.02407
chr1_2	84000000	84100000	2191	0.02191
chr1_2	84100000	84200000	1832	0.01832
chr1_2	84200000	84300000	1971	0.01971
chr1_2	84300000	84400000	2474	0.02474
chr1_2	84400000	84500000	1706	0.01706
chr1_2	84500000	84600000	1485	0.01485
chr1_2	84600000	84700000	1546	0.01546
chr1_2	84700000	84800000	2227	0.02227
chr1_2	84800000	84900000	1239	0.01239
chr1_2	84900000	85000000	1600	0.016
chr1_2	85000000	85100000	2506	0.02506
chr1_2	85100000	85200000	1319	0.01319
chr1_2	85200000	85300000	790	0.0079
chr1_2	85300000	85400000	0	0
chr1_2	85400000	85500000	0	0
chr1_2	85500000	85600000	0	0
chr1_2	85600000	85700000	0	0
chr1_2	85700000	85800000	0	0
chr1_2	85800000	85900000	0	0
chr1_2	85900000	86000000	0	0
chr1_2	86000000	86100000	43	0.00043
chr1_2	86100000	86200000	1462	0.01462
chr1_2	86200000	86300000	1139	0.01139
chr1_2	86300000	86400000	1334	0.01334
chr1_2	86400000	86500000	1305	0.01305
chr1_2	86500000	86600000	1644	0.01644
chr1_2	86600000	86700000	1286	0.01286
chr1_2	86700000	86800000	1436	0.01436
chr1_2	86800000	86900000	1634	0.01634
chr1_2	86900000	87000000	2565	0.02565
chr1_2	87000000	87100000	2861	0.02861
chr1_2	87100000	87200000	2173	0.02173
chr1_2	87200000	87300000	1875	0.01875
chr1_2	87300000	87400000	2827	0.02827
chr1_2	87400000	87500000	3252	0.03252
chr1_2	87500000	87600000	2339	0.02339
chr1_2	87600000	87700000	99	0.00099
chr1_2	87700000	87800000	1244	0.01244
chr1_2	87800000	87900000	0	0
chr1_2	87900000	88000000	0	0
chr1_2	88000000	88100000	3	3e-05
chr1_2	88100000	88200000	0	0
chr1_2	88200000	88300000	0	0
chr1_2	88300000	88400000	0	0
chr1_2	88400000	88500000	0	0
chr1_2	88500000	88600000	0	0
chr1_2	88600000	88700000	0	0
chr1_2	88700000	88800000	0	0
chr1_2	88800000	88900000	0	0
chr1_2	88900000	89000000	0	0
chr1_2	89000000	89100000	0	0
chr1_2	89100000	89200000	0	0
chr1_2	89200000	89300000	0	0
chr1_2	89300000	89400000	0	0
chr1_2	89400000	89500000	0	0
chr1_2	89500000	89600000	0	0
chr1_2	89600000	89700000	0	0
chr1_2	89700000	89800000	0	0
chr1_2	89800000	89900000	0	0
chr1_2	89900000	90000000	0	0
chr1_2	90000000	90100000	0	0
chr1_2	90100000	90200000	0	0
chr1_2	90200000	90300000	0	0
chr1_2	90300000	90400000	0	0
chr1_2	90400000	90500000	5	5e-05
chr1_2	90500000	90600000	0	0
chr1_2	90600000	90700000	127	0.00127
chr1_2	90700000	90800000	678	0.00678
chr1_2	90800000	90900000	618	0.00618
chr1_2	90900000	91000000	862	0.00862
chr1_2	91000000	91100000	1200	0.012
chr1_2	91100000	91200000	756	0.00756
chr1_2	91200000	91300000	0	0
chr1_2	91300000	91400000	0	0
chr1_2	91400000	91500000	1355	0.01355
chr1_2	91500000	91600000	250	0.0025
chr1_2	91600000	91700000	55	0.00055
chr1_2	91700000	91800000	403	0.00403
chr1_2	91800000	91900000	364	0.00364
chr1_2	91900000	92000000	231	0.00231
chr1_2	92000000	92100000	1619	0.01619
chr1_2	92100000	92200000	2048	0.02048
chr1_2	92200000	92300000	1101	0.01101
chr1_2	92300000	92400000	0	0
chr1_2	92400000	92500000	600	0.006
chr1_2	92500000	92600000	289	0.00289
chr1_2	92600000	92700000	61	0.00061
chr1_2	92700000	92800000	21	0.00021
chr1_2	92800000	92900000	1209	0.01209
chr1_2	92900000	93000000	1211	0.01211
chr1_2	93000000	93100000	1108	0.01108
chr1_2	93100000	93200000	889	0.00889
chr1_2	93200000	93300000	982	0.00982
chr1_2	93300000	93400000	434	0.00434
chr1_2	93400000	93500000	724	0.00724
chr1_2	93500000	93600000	831	0.00831
chr1_2	93600000	93700000	1110	0.0111
chr1_2	93700000	93800000	937	0.00937
chr1_2	93800000	93900000	6	6e-05
chr1_2	93900000	94000000	10	0.0001
chr1_2	94000000	94100000	10	0.0001
chr1_2	94100000	94200000	30	0.0003
chr1_2	94200000	94256624	6	6e-05
chr1_3	0	100000	56	0.00056
chr1_3	100000	200000	16	0.00016
chr1_3	200000	300000	37	0.00037
chr1_3	300000	400000	718	0.00718
chr1_3	400000	500000	1498	0.01498
chr1_3	500000	600000	80	0.0008
chr1_3	600000	700000	26	0.00026
chr1_3	700000	800000	128	0.00128
chr1_3	800000	900000	951	0.00951
chr1_3	900000	1000000	2486	0.02486
chr1_3	1000000	1100000	548	0.00548
chr1_3	1100000	1200000	263	0.00263
chr1_3	1200000	1300000	1412	0.01412
chr1_3	1300000	1400000	1143	0.01143
chr1_3	1400000	1500000	1730	0.0173
chr1_3	1500000	1600000	26	0.00026
chr1_3	1600000	1700000	92	0.00092
chr1_3	1700000	1800000	0	0
chr1_3	1800000	1900000	36	0.00036
chr1_3	1900000	2000000	75	0.00075
chr1_3	2000000	2100000	1709	0.01709
chr1_3	2100000	2200000	1873	0.01873
chr1_3	2200000	2300000	2055	0.02055
chr1_3	2300000	2400000	2708	0.02708
chr1_3	2400000	2500000	3159	0.03159
chr1_3	2500000	2600000	3394	0.03394
chr1_3	2600000	2700000	2310	0.0231
chr1_3	2700000	2800000	2592	0.02592
chr1_3	2800000	2900000	2482	0.02482
chr1_3	2900000	3000000	2094	0.02094
chr1_3	3000000	3100000	3674	0.03674
chr1_3	3100000	3200000	2114	0.02114
chr1_3	3200000	3300000	1432	0.01432
chr1_3	3300000	3400000	2471	0.02471
chr1_3	3400000	3500000	2727	0.02727
chr1_3	3500000	3600000	2963	0.02963
chr1_3	3600000	3700000	2222	0.02222
chr1_3	3700000	3800000	2141	0.02141
chr1_3	3800000	3900000	1404	0.01404
chr1_3	3900000	4000000	2285	0.02285
chr1_3	4000000	4100000	2348	0.02348
chr1_3	4100000	4200000	2550	0.0255
chr1_3	4200000	4300000	2433	0.02433
chr1_3	4300000	4400000	2125	0.02125
chr1_3	4400000	4500000	1916	0.01916
chr1_3	4500000	4600000	1727	0.01727
chr1_3	4600000	4700000	2156	0.02156
chr1_3	4700000	4800000	2384	0.02384
chr1_3	4800000	4900000	2054	0.02054
chr1_3	4900000	5000000	2927	0.02927
chr1_3	5000000	5100000	1765	0.01765
chr1_3	5100000	5200000	2586	0.02586
chr1_3	5200000	5300000	3215	0.03215
chr1_3	5300000	5400000	1697	0.01697
chr1_3	5400000	5500000	1804	0.01804
chr1_3	5500000	5600000	2158	0.02158
chr1_3	5600000	5700000	2318	0.02318
chr1_3	5700000	5800000	3561	0.03561
chr1_3	5800000	5900000	1552	0.01552
chr1_3	5900000	6000000	21	0.00021
chr1_3	6000000	6100000	1142	0.01142
[truncated: 28,405 more rows]
