# Supplementary material for: Resequencing Elucidates the Genetic Mechanism Underlying Elite Early-Maturing Potato Parent Kexin23
Source: Research Square preprint supplement (doi:10.21203/rs.3.rs-7582259/v1), 2025-12-02
Supplement: Supplementary file 27 [file Table S7. Distribution frequency of InDels across genomic regions.xls]

## Sheet: Sheet1
Chr.	Position-start	Position-end	Number	Rate
chr1_1	0	100000	91	0.00091
chr1_1	100000	200000	151	0.00151
chr1_1	200000	300000	205	0.00205
chr1_1	300000	400000	137	0.00137
chr1_1	400000	500000	204	0.00204
chr1_1	500000	600000	229	0.00229
chr1_1	600000	700000	278	0.00278
chr1_1	700000	800000	263	0.00263
chr1_1	800000	900000	331	0.00331
chr1_1	900000	1000000	316	0.00316
chr1_1	1000000	1100000	343	0.00343
chr1_1	1100000	1200000	333	0.00333
chr1_1	1200000	1300000	277	0.00277
chr1_1	1300000	1400000	141	0.00141
chr1_1	1400000	1500000	211	0.00211
chr1_1	1500000	1600000	125	0.00125
chr1_1	1600000	1700000	65	0.00065
chr1_1	1700000	1800000	72	0.00072
chr1_1	1800000	1900000	193	0.00193
chr1_1	1900000	2000000	438	0.00438
chr1_1	2000000	2100000	263	0.00263
chr1_1	2100000	2200000	409	0.00409
chr1_1	2200000	2300000	187	0.00187
chr1_1	2300000	2400000	165	0.00165
chr1_1	2400000	2500000	233	0.00233
chr1_1	2500000	2600000	266	0.00266
chr1_1	2600000	2700000	325	0.00325
chr1_1	2700000	2800000	284	0.00284
chr1_1	2800000	2900000	393	0.00393
chr1_1	2900000	3000000	351	0.00351
chr1_1	3000000	3100000	485	0.00485
chr1_1	3100000	3200000	370	0.0037
chr1_1	3200000	3300000	337	0.00337
chr1_1	3300000	3400000	235	0.00235
chr1_1	3400000	3500000	289	0.00289
chr1_1	3500000	3600000	190	0.0019
chr1_1	3600000	3700000	297	0.00297
chr1_1	3700000	3800000	468	0.00468
chr1_1	3800000	3900000	481	0.00481
chr1_1	3900000	4000000	456	0.00456
chr1_1	4000000	4100000	370	0.0037
chr1_1	4100000	4200000	391	0.00391
chr1_1	4200000	4300000	347	0.00347
chr1_1	4300000	4400000	453	0.00453
chr1_1	4400000	4500000	427	0.00427
chr1_1	4500000	4600000	483	0.00483
chr1_1	4600000	4700000	434	0.00434
chr1_1	4700000	4800000	412	0.00412
chr1_1	4800000	4900000	118	0.00118
chr1_1	4900000	5000000	330	0.0033
chr1_1	5000000	5100000	326	0.00326
chr1_1	5100000	5200000	274	0.00274
chr1_1	5200000	5300000	267	0.00267
chr1_1	5300000	5400000	310	0.0031
chr1_1	5400000	5500000	243	0.00243
chr1_1	5500000	5600000	84	0.00084
chr1_1	5600000	5700000	297	0.00297
chr1_1	5700000	5800000	306	0.00306
chr1_1	5800000	5900000	240	0.0024
chr1_1	5900000	6000000	273	0.00273
chr1_1	6000000	6100000	291	0.00291
chr1_1	6100000	6200000	215	0.00215
chr1_1	6200000	6300000	203	0.00203
chr1_1	6300000	6400000	209	0.00209
chr1_1	6400000	6500000	419	0.00419
chr1_1	6500000	6600000	333	0.00333
chr1_1	6600000	6700000	0	0
chr1_1	6700000	6800000	0	0
chr1_1	6800000	6900000	0	0
chr1_1	6900000	7000000	0	0
chr1_1	7000000	7100000	0	0
chr1_1	7100000	7200000	0	0
chr1_1	7200000	7300000	0	0
chr1_1	7300000	7400000	28	0.00028
chr1_1	7400000	7500000	317	0.00317
chr1_1	7500000	7600000	494	0.00494
chr1_1	7600000	7700000	509	0.00509
chr1_1	7700000	7800000	723	0.00723
chr1_1	7800000	7900000	495	0.00495
chr1_1	7900000	8000000	622	0.00622
chr1_1	8000000	8100000	514	0.00514
chr1_1	8100000	8200000	233	0.00233
chr1_1	8200000	8300000	277	0.00277
chr1_1	8300000	8400000	203	0.00203
chr1_1	8400000	8500000	167	0.00167
chr1_1	8500000	8600000	122	0.00122
chr1_1	8600000	8700000	80	0.0008
chr1_1	8700000	8800000	28	0.00028
chr1_1	8800000	8900000	71	0.00071
chr1_1	8900000	9000000	146	0.00146
chr1_1	9000000	9100000	154	0.00154
chr1_1	9100000	9200000	238	0.00238
chr1_1	9200000	9300000	190	0.0019
chr1_1	9300000	9400000	0	0
chr1_1	9400000	9500000	6	6e-05
chr1_1	9500000	9600000	29	0.00029
chr1_1	9600000	9700000	0	0
chr1_1	9700000	9800000	4	4e-05
chr1_1	9800000	9900000	2	2e-05
chr1_1	9900000	10000000	0	0
chr1_1	10000000	10100000	1	1e-05
chr1_1	10100000	10200000	1	1e-05
chr1_1	10200000	10300000	0	0
chr1_1	10300000	10400000	0	0
chr1_1	10400000	10500000	0	0
chr1_1	10500000	10600000	0	0
chr1_1	10600000	10700000	0	0
chr1_1	10700000	10800000	0	0
chr1_1	10800000	10900000	0	0
chr1_1	10900000	11000000	0	0
chr1_1	11000000	11100000	0	0
chr1_1	11100000	11200000	0	0
chr1_1	11200000	11300000	0	0
chr1_1	11300000	11400000	2	2e-05
chr1_1	11400000	11500000	0	0
chr1_1	11500000	11600000	2	2e-05
chr1_1	11600000	11700000	1	1e-05
chr1_1	11700000	11800000	29	0.00029
chr1_1	11800000	11900000	0	0
chr1_1	11900000	12000000	5	5e-05
chr1_1	12000000	12100000	5	5e-05
chr1_1	12100000	12200000	0	0
chr1_1	12200000	12300000	113	0.00113
chr1_1	12300000	12400000	54	0.00054
chr1_1	12400000	12500000	58	0.00058
chr1_1	12500000	12600000	268	0.00268
chr1_1	12600000	12700000	182	0.00182
chr1_1	12700000	12800000	140	0.0014
chr1_1	12800000	12900000	44	0.00044
chr1_1	12900000	13000000	153	0.00153
chr1_1	13000000	13100000	260	0.0026
chr1_1	13100000	13200000	123	0.00123
chr1_1	13200000	13300000	2	2e-05
chr1_1	13300000	13400000	4	4e-05
chr1_1	13400000	13500000	0	0
chr1_1	13500000	13600000	0	0
chr1_1	13600000	13700000	9	9e-05
chr1_1	13700000	13800000	0	0
chr1_1	13800000	13900000	6	6e-05
chr1_1	13900000	14000000	1	1e-05
chr1_1	14000000	14100000	10	0.0001
chr1_1	14100000	14200000	3	3e-05
chr1_1	14200000	14300000	1	1e-05
chr1_1	14300000	14400000	0	0
chr1_1	14400000	14500000	187	0.00187
chr1_1	14500000	14600000	188	0.00188
chr1_1	14600000	14700000	226	0.00226
chr1_1	14700000	14800000	354	0.00354
chr1_1	14800000	14900000	186	0.00186
chr1_1	14900000	15000000	80	0.0008
chr1_1	15000000	15100000	71	0.00071
chr1_1	15100000	15200000	61	0.00061
chr1_1	15200000	15300000	20	0.0002
chr1_1	15300000	15400000	67	0.00067
chr1_1	15400000	15500000	122	0.00122
chr1_1	15500000	15600000	166	0.00166
chr1_1	15600000	15700000	111	0.00111
chr1_1	15700000	15800000	116	0.00116
chr1_1	15800000	15900000	123	0.00123
chr1_1	15900000	16000000	237	0.00237
chr1_1	16000000	16100000	306	0.00306
chr1_1	16100000	16200000	389	0.00389
chr1_1	16200000	16300000	200	0.002
chr1_1	16300000	16400000	112	0.00112
chr1_1	16400000	16500000	111	0.00111
chr1_1	16500000	16600000	203	0.00203
chr1_1	16600000	16700000	122	0.00122
chr1_1	16700000	16800000	107	0.00107
chr1_1	16800000	16900000	62	0.00062
chr1_1	16900000	17000000	192	0.00192
chr1_1	17000000	17100000	80	0.0008
chr1_1	17100000	17200000	56	0.00056
chr1_1	17200000	17300000	49	0.00049
chr1_1	17300000	17400000	173	0.00173
chr1_1	17400000	17500000	147	0.00147
chr1_1	17500000	17600000	107	0.00107
chr1_1	17600000	17700000	243	0.00243
chr1_1	17700000	17800000	82	0.00082
chr1_1	17800000	17900000	104	0.00104
chr1_1	17900000	18000000	57	0.00057
chr1_1	18000000	18100000	68	0.00068
chr1_1	18100000	18200000	80	0.0008
chr1_1	18200000	18300000	43	0.00043
chr1_1	18300000	18400000	142	0.00142
chr1_1	18400000	18500000	243	0.00243
chr1_1	18500000	18600000	230	0.0023
chr1_1	18600000	18700000	198	0.00198
chr1_1	18700000	18800000	352	0.00352
chr1_1	18800000	18900000	138	0.00138
chr1_1	18900000	19000000	114	0.00114
chr1_1	19000000	19100000	105	0.00105
chr1_1	19100000	19200000	245	0.00245
chr1_1	19200000	19300000	200	0.002
chr1_1	19300000	19400000	234	0.00234
chr1_1	19400000	19500000	247	0.00247
chr1_1	19500000	19600000	253	0.00253
chr1_1	19600000	19700000	176	0.00176
chr1_1	19700000	19800000	179	0.00179
chr1_1	19800000	19900000	150	0.0015
chr1_1	19900000	20000000	238	0.00238
chr1_1	20000000	20100000	131	0.00131
chr1_1	20100000	20200000	155	0.00155
chr1_1	20200000	20300000	125	0.00125
chr1_1	20300000	20400000	183	0.00183
chr1_1	20400000	20500000	183	0.00183
chr1_1	20500000	20600000	93	0.00093
chr1_1	20600000	20700000	128	0.00128
chr1_1	20700000	20800000	81	0.00081
chr1_1	20800000	20900000	122	0.00122
chr1_1	20900000	21000000	187	0.00187
chr1_1	21000000	21100000	125	0.00125
chr1_1	21100000	21200000	139	0.00139
chr1_1	21200000	21300000	151	0.00151
chr1_1	21300000	21400000	310	0.0031
chr1_1	21400000	21500000	220	0.0022
chr1_1	21500000	21600000	221	0.00221
chr1_1	21600000	21700000	241	0.00241
chr1_1	21700000	21800000	326	0.00326
chr1_1	21800000	21900000	222	0.00222
chr1_1	21900000	22000000	178	0.00178
chr1_1	22000000	22100000	186	0.00186
chr1_1	22100000	22200000	150	0.0015
chr1_1	22200000	22300000	259	0.00259
chr1_1	22300000	22400000	230	0.0023
chr1_1	22400000	22500000	206	0.00206
chr1_1	22500000	22600000	129	0.00129
chr1_1	22600000	22700000	161	0.00161
chr1_1	22700000	22800000	172	0.00172
chr1_1	22800000	22900000	133	0.00133
chr1_1	22900000	23000000	90	0.0009
chr1_1	23000000	23100000	194	0.00194
chr1_1	23100000	23200000	121	0.00121
chr1_1	23200000	23300000	114	0.00114
chr1_1	23300000	23400000	195	0.00195
chr1_1	23400000	23500000	151	0.00151
chr1_1	23500000	23600000	259	0.00259
chr1_1	23600000	23700000	234	0.00234
chr1_1	23700000	23800000	202	0.00202
chr1_1	23800000	23900000	194	0.00194
chr1_1	23900000	24000000	191	0.00191
chr1_1	24000000	24100000	230	0.0023
chr1_1	24100000	24200000	179	0.00179
chr1_1	24200000	24300000	167	0.00167
chr1_1	24300000	24400000	220	0.0022
chr1_1	24400000	24500000	184	0.00184
chr1_1	24500000	24600000	82	0.00082
chr1_1	24600000	24700000	38	0.00038
chr1_1	24700000	24800000	65	0.00065
chr1_1	24800000	24900000	123	0.00123
chr1_1	24900000	25000000	81	0.00081
chr1_1	25000000	25100000	258	0.00258
chr1_1	25100000	25200000	116	0.00116
chr1_1	25200000	25300000	163	0.00163
chr1_1	25300000	25400000	70	0.0007
chr1_1	25400000	25500000	107	0.00107
chr1_1	25500000	25600000	149	0.00149
chr1_1	25600000	25700000	157	0.00157
chr1_1	25700000	25800000	193	0.00193
chr1_1	25800000	25900000	130	0.0013
chr1_1	25900000	26000000	192	0.00192
chr1_1	26000000	26100000	115	0.00115
chr1_1	26100000	26200000	223	0.00223
chr1_1	26200000	26300000	219	0.00219
chr1_1	26300000	26400000	167	0.00167
chr1_1	26400000	26500000	102	0.00102
chr1_1	26500000	26600000	87	0.00087
chr1_1	26600000	26700000	128	0.00128
chr1_1	26700000	26800000	124	0.00124
chr1_1	26800000	26900000	95	0.00095
chr1_1	26900000	27000000	104	0.00104
chr1_1	27000000	27100000	91	0.00091
chr1_1	27100000	27200000	73	0.00073
chr1_1	27200000	27300000	67	0.00067
chr1_1	27300000	27400000	86	0.00086
chr1_1	27400000	27500000	106	0.00106
chr1_1	27500000	27600000	46	0.00046
chr1_1	27600000	27700000	159	0.00159
chr1_1	27700000	27800000	216	0.00216
chr1_1	27800000	27900000	147	0.00147
chr1_1	27900000	28000000	191	0.00191
chr1_1	28000000	28100000	100	0.001
chr1_1	28100000	28200000	155	0.00155
chr1_1	28200000	28300000	179	0.00179
chr1_1	28300000	28400000	230	0.0023
chr1_1	28400000	28500000	525	0.00525
chr1_1	28500000	28600000	371	0.00371
chr1_1	28600000	28700000	194	0.00194
chr1_1	28700000	28800000	349	0.00349
chr1_1	28800000	28900000	172	0.00172
chr1_1	28900000	29000000	298	0.00298
chr1_1	29000000	29100000	270	0.0027
chr1_1	29100000	29200000	214	0.00214
chr1_1	29200000	29300000	163	0.00163
chr1_1	29300000	29400000	2	2e-05
chr1_1	29400000	29500000	5	5e-05
chr1_1	29500000	29600000	15	0.00015
chr1_1	29600000	29700000	167	0.00167
chr1_1	29700000	29800000	132	0.00132
chr1_1	29800000	29900000	179	0.00179
chr1_1	29900000	30000000	133	0.00133
chr1_1	30000000	30100000	130	0.0013
chr1_1	30100000	30200000	172	0.00172
chr1_1	30200000	30300000	194	0.00194
chr1_1	30300000	30400000	154	0.00154
chr1_1	30400000	30500000	220	0.0022
chr1_1	30500000	30600000	159	0.00159
chr1_1	30600000	30700000	132	0.00132
chr1_1	30700000	30800000	202	0.00202
chr1_1	30800000	30900000	206	0.00206
chr1_1	30900000	31000000	146	0.00146
chr1_1	31000000	31100000	108	0.00108
chr1_1	31100000	31200000	112	0.00112
chr1_1	31200000	31300000	148	0.00148
chr1_1	31300000	31400000	250	0.0025
chr1_1	31400000	31500000	349	0.00349
chr1_1	31500000	31600000	187	0.00187
chr1_1	31600000	31700000	247	0.00247
chr1_1	31700000	31800000	192	0.00192
chr1_1	31800000	31900000	160	0.0016
chr1_1	31900000	32000000	280	0.0028
chr1_1	32000000	32100000	260	0.0026
chr1_1	32100000	32200000	167	0.00167
chr1_1	32200000	32300000	133	0.00133
chr1_1	32300000	32400000	243	0.00243
chr1_1	32400000	32500000	332	0.00332
chr1_1	32500000	32600000	283	0.00283
chr1_1	32600000	32700000	184	0.00184
chr1_1	32700000	32800000	309	0.00309
chr1_1	32800000	32900000	334	0.00334
chr1_1	32900000	33000000	197	0.00197
chr1_1	33000000	33100000	277	0.00277
chr1_1	33100000	33200000	64	0.00064
chr1_1	33200000	33300000	188	0.00188
chr1_1	33300000	33400000	199	0.00199
chr1_1	33400000	33500000	172	0.00172
chr1_1	33500000	33600000	177	0.00177
chr1_1	33600000	33700000	247	0.00247
chr1_1	33700000	33800000	288	0.00288
chr1_1	33800000	33900000	220	0.0022
chr1_1	33900000	34000000	279	0.00279
chr1_1	34000000	34100000	207	0.00207
chr1_1	34100000	34200000	174	0.00174
chr1_1	34200000	34300000	141	0.00141
chr1_1	34300000	34400000	138	0.00138
chr1_1	34400000	34500000	189	0.00189
chr1_1	34500000	34600000	126	0.00126
chr1_1	34600000	34700000	238	0.00238
chr1_1	34700000	34800000	326	0.00326
chr1_1	34800000	34900000	316	0.00316
chr1_1	34900000	35000000	284	0.00284
chr1_1	35000000	35100000	188	0.00188
chr1_1	35100000	35200000	344	0.00344
chr1_1	35200000	35300000	155	0.00155
chr1_1	35300000	35400000	254	0.00254
chr1_1	35400000	35500000	394	0.00394
chr1_1	35500000	35600000	104	0.00104
chr1_1	35600000	35700000	0	0
chr1_1	35700000	35800000	0	0
chr1_1	35800000	35900000	3	3e-05
chr1_1	35900000	36000000	0	0
chr1_1	36000000	36100000	0	0
chr1_1	36100000	36200000	0	0
chr1_1	36200000	36300000	0	0
chr1_1	36300000	36400000	0	0
chr1_1	36400000	36500000	0	0
chr1_1	36500000	36600000	0	0
chr1_1	36600000	36700000	0	0
chr1_1	36700000	36800000	0	0
chr1_1	36800000	36900000	0	0
chr1_1	36900000	37000000	0	0
chr1_1	37000000	37100000	0	0
chr1_1	37100000	37200000	0	0
chr1_1	37200000	37300000	0	0
chr1_1	37300000	37400000	0	0
chr1_1	37400000	37500000	7	7e-05
chr1_1	37500000	37600000	2	2e-05
chr1_1	37600000	37700000	0	0
chr1_1	37700000	37800000	0	0
chr1_1	37800000	37900000	2	2e-05
chr1_1	37900000	38000000	0	0
chr1_1	38000000	38100000	0	0
chr1_1	38100000	38200000	0	0
chr1_1	38200000	38300000	0	0
chr1_1	38300000	38400000	1	1e-05
chr1_1	38400000	38500000	1	1e-05
chr1_1	38500000	38600000	3	3e-05
chr1_1	38600000	38700000	18	0.00018
chr1_1	38700000	38800000	22	0.00022
chr1_1	38800000	38900000	46	0.00046
chr1_1	38900000	39000000	15	0.00015
chr1_1	39000000	39100000	45	0.00045
chr1_1	39100000	39200000	20	0.0002
chr1_1	39200000	39300000	59	0.00059
chr1_1	39300000	39400000	90	0.0009
chr1_1	39400000	39500000	259	0.00259
chr1_1	39500000	39600000	193	0.00193
chr1_1	39600000	39700000	157	0.00157
chr1_1	39700000	39800000	197	0.00197
chr1_1	39800000	39900000	172	0.00172
chr1_1	39900000	40000000	273	0.00273
chr1_1	40000000	40100000	243	0.00243
chr1_1	40100000	40200000	141	0.00141
chr1_1	40200000	40300000	186	0.00186
chr1_1	40300000	40400000	196	0.00196
chr1_1	40400000	40500000	256	0.00256
chr1_1	40500000	40600000	300	0.003
chr1_1	40600000	40700000	198	0.00198
chr1_1	40700000	40800000	349	0.00349
chr1_1	40800000	40900000	115	0.00115
chr1_1	40900000	41000000	184	0.00184
chr1_1	41000000	41100000	296	0.00296
chr1_1	41100000	41200000	94	0.00094
chr1_1	41200000	41300000	248	0.00248
chr1_1	41300000	41400000	201	0.00201
chr1_1	41400000	41500000	286	0.00286
chr1_1	41500000	41600000	434	0.00434
chr1_1	41600000	41700000	417	0.00417
chr1_1	41700000	41800000	515	0.00515
chr1_1	41800000	41900000	550	0.0055
chr1_1	41900000	42000000	317	0.00317
chr1_1	42000000	42100000	381	0.00381
chr1_1	42100000	42200000	305	0.00305
chr1_1	42200000	42300000	491	0.00491
chr1_1	42300000	42400000	323	0.00323
chr1_1	42400000	42500000	176	0.00176
chr1_1	42500000	42600000	245	0.00245
chr1_1	42600000	42700000	203	0.00203
chr1_1	42700000	42800000	158	0.00158
chr1_1	42800000	42900000	122	0.00122
chr1_1	42900000	43000000	130	0.0013
chr1_1	43000000	43100000	114	0.00114
chr1_1	43100000	43200000	104	0.00104
chr1_1	43200000	43300000	247	0.00247
chr1_1	43300000	43400000	208	0.00208
chr1_1	43400000	43500000	129	0.00129
chr1_1	43500000	43600000	165	0.00165
chr1_1	43600000	43700000	154	0.00154
chr1_1	43700000	43800000	176	0.00176
chr1_1	43800000	43900000	291	0.00291
chr1_1	43900000	44000000	151	0.00151
chr1_1	44000000	44100000	111	0.00111
chr1_1	44100000	44200000	58	0.00058
chr1_1	44200000	44300000	99	0.00099
chr1_1	44300000	44400000	106	0.00106
chr1_1	44400000	44500000	142	0.00142
chr1_1	44500000	44600000	67	0.00067
chr1_1	44600000	44700000	38	0.00038
chr1_1	44700000	44800000	34	0.00034
chr1_1	44800000	44900000	153	0.00153
chr1_1	44900000	45000000	114	0.00114
chr1_1	45000000	45100000	262	0.00262
chr1_1	45100000	45200000	193	0.00193
chr1_1	45200000	45300000	108	0.00108
chr1_1	45300000	45400000	55	0.00055
chr1_1	45400000	45500000	228	0.00228
chr1_1	45500000	45600000	304	0.00304
chr1_1	45600000	45700000	253	0.00253
chr1_1	45700000	45800000	119	0.00119
chr1_1	45800000	45900000	82	0.00082
chr1_1	45900000	46000000	84	0.00084
chr1_1	46000000	46100000	219	0.00219
chr1_1	46100000	46200000	138	0.00138
chr1_1	46200000	46300000	20	0.0002
chr1_1	46300000	46400000	78	0.00078
chr1_1	46400000	46500000	97	0.00097
chr1_1	46500000	46600000	64	0.00064
chr1_1	46600000	46700000	152	0.00152
chr1_1	46700000	46800000	249	0.00249
chr1_1	46800000	46900000	319	0.00319
chr1_1	46900000	47000000	203	0.00203
chr1_1	47000000	47100000	119	0.00119
chr1_1	47100000	47200000	113	0.00113
chr1_1	47200000	47300000	84	0.00084
chr1_1	47300000	47400000	113	0.00113
chr1_1	47400000	47500000	67	0.00067
chr1_1	47500000	47600000	84	0.00084
chr1_1	47600000	47700000	84	0.00084
chr1_1	47700000	47800000	127	0.00127
chr1_1	47800000	47900000	90	0.0009
chr1_1	47900000	48000000	77	0.00077
chr1_1	48000000	48100000	239	0.00239
chr1_1	48100000	48200000	70	0.0007
chr1_1	48200000	48300000	113	0.00113
chr1_1	48300000	48400000	195	0.00195
chr1_1	48400000	48500000	226	0.00226
chr1_1	48500000	48600000	422	0.00422
chr1_1	48600000	48700000	429	0.00429
chr1_1	48700000	48800000	164	0.00164
chr1_1	48800000	48900000	108	0.00108
chr1_1	48900000	49000000	82	0.00082
chr1_1	49000000	49100000	439	0.00439
chr1_1	49100000	49200000	269	0.00269
chr1_1	49200000	49300000	305	0.00305
chr1_1	49300000	49400000	249	0.00249
chr1_1	49400000	49500000	116	0.00116
chr1_1	49500000	49600000	246	0.00246
chr1_1	49600000	49700000	127	0.00127
chr1_1	49700000	49800000	134	0.00134
chr1_1	49800000	49900000	103	0.00103
chr1_1	49900000	50000000	106	0.00106
chr1_1	50000000	50100000	352	0.00352
chr1_1	50100000	50200000	477	0.00477
chr1_1	50200000	50300000	462	0.00462
chr1_1	50300000	50400000	226	0.00226
chr1_1	50400000	50500000	592	0.00592
chr1_1	50500000	50600000	149	0.00149
chr1_1	50600000	50700000	123	0.00123
chr1_1	50700000	50800000	471	0.00471
chr1_1	50800000	50900000	153	0.00153
chr1_1	50900000	51000000	296	0.00296
chr1_1	51000000	51100000	251	0.00251
chr1_1	51100000	51200000	191	0.00191
chr1_1	51200000	51300000	193	0.00193
chr1_1	51300000	51400000	163	0.00163
chr1_1	51400000	51500000	377	0.00377
chr1_1	51500000	51600000	466	0.00466
chr1_1	51600000	51700000	286	0.00286
chr1_1	51700000	51800000	361	0.00361
chr1_1	51800000	51900000	321	0.00321
chr1_1	51900000	52000000	381	0.00381
chr1_1	52000000	52100000	269	0.00269
chr1_1	52100000	52200000	79	0.00079
chr1_1	52200000	52300000	431	0.00431
chr1_1	52300000	52400000	214	0.00214
chr1_1	52400000	52500000	444	0.00444
chr1_1	52500000	52600000	326	0.00326
chr1_1	52600000	52700000	295	0.00295
chr1_1	52700000	52800000	658	0.00658
chr1_1	52800000	52900000	332	0.00332
chr1_1	52900000	53000000	188	0.00188
chr1_1	53000000	53100000	176	0.00176
chr1_1	53100000	53200000	145	0.00145
chr1_1	53200000	53300000	171	0.00171
chr1_1	53300000	53400000	210	0.0021
chr1_1	53400000	53500000	232	0.00232
chr1_1	53500000	53600000	160	0.0016
chr1_1	53600000	53700000	110	0.0011
chr1_1	53700000	53800000	206	0.00206
chr1_1	53800000	53900000	112	0.00112
chr1_1	53900000	54000000	80	0.0008
chr1_1	54000000	54100000	60	0.0006
chr1_1	54100000	54200000	107	0.00107
chr1_1	54200000	54300000	139	0.00139
chr1_1	54300000	54400000	229	0.00229
chr1_1	54400000	54500000	149	0.00149
chr1_1	54500000	54600000	188	0.00188
chr1_1	54600000	54700000	125	0.00125
chr1_1	54700000	54800000	304	0.00304
chr1_1	54800000	54900000	190	0.0019
chr1_1	54900000	55000000	128	0.00128
chr1_1	55000000	55100000	89	0.00089
chr1_1	55100000	55200000	141	0.00141
chr1_1	55200000	55300000	195	0.00195
chr1_1	55300000	55400000	223	0.00223
chr1_1	55400000	55500000	394	0.00394
chr1_1	55500000	55600000	145	0.00145
chr1_1	55600000	55700000	224	0.00224
chr1_1	55700000	55800000	184	0.00184
chr1_1	55800000	55900000	155	0.00155
chr1_1	55900000	56000000	94	0.00094
chr1_1	56000000	56100000	202	0.00202
chr1_1	56100000	56200000	49	0.00049
chr1_1	56200000	56300000	227	0.00227
chr1_1	56300000	56400000	230	0.0023
chr1_1	56400000	56500000	241	0.00241
chr1_1	56500000	56600000	461	0.00461
chr1_1	56600000	56700000	360	0.0036
chr1_1	56700000	56800000	503	0.00503
chr1_1	56800000	56900000	192	0.00192
chr1_1	56900000	57000000	94	0.00094
chr1_1	57000000	57100000	235	0.00235
chr1_1	57100000	57200000	122	0.00122
chr1_1	57200000	57300000	188	0.00188
chr1_1	57300000	57400000	279	0.00279
chr1_1	57400000	57500000	195	0.00195
chr1_1	57500000	57600000	141	0.00141
chr1_1	57600000	57700000	220	0.0022
chr1_1	57700000	57800000	147	0.00147
chr1_1	57800000	57900000	227	0.00227
chr1_1	57900000	58000000	87	0.00087
chr1_1	58000000	58100000	147	0.00147
chr1_1	58100000	58200000	206	0.00206
chr1_1	58200000	58300000	128	0.00128
chr1_1	58300000	58400000	82	0.00082
chr1_1	58400000	58500000	109	0.00109
chr1_1	58500000	58600000	69	0.00069
chr1_1	58600000	58700000	103	0.00103
chr1_1	58700000	58800000	172	0.00172
chr1_1	58800000	58900000	155	0.00155
chr1_1	58900000	59000000	72	0.00072
chr1_1	59000000	59100000	169	0.00169
chr1_1	59100000	59200000	109	0.00109
chr1_1	59200000	59300000	90	0.0009
chr1_1	59300000	59400000	204	0.00204
chr1_1	59400000	59500000	132	0.00132
chr1_1	59500000	59600000	202	0.00202
chr1_1	59600000	59700000	240	0.0024
chr1_1	59700000	59800000	180	0.0018
chr1_1	59800000	59900000	154	0.00154
chr1_1	59900000	60000000	178	0.00178
chr1_1	60000000	60100000	99	0.00099
chr1_1	60100000	60200000	161	0.00161
chr1_1	60200000	60300000	113	0.00113
chr1_1	60300000	60400000	95	0.00095
chr1_1	60400000	60500000	153	0.00153
chr1_1	60500000	60600000	76	0.00076
chr1_1	60600000	60700000	101	0.00101
chr1_1	60700000	60800000	68	0.00068
chr1_1	60800000	60900000	164	0.00164
chr1_1	60900000	61000000	132	0.00132
chr1_1	61000000	61100000	83	0.00083
chr1_1	61100000	61200000	207	0.00207
chr1_1	61200000	61300000	164	0.00164
chr1_1	61300000	61400000	100	0.001
chr1_1	61400000	61500000	113	0.00113
chr1_1	61500000	61600000	139	0.00139
chr1_1	61600000	61700000	177	0.00177
chr1_1	61700000	61800000	153	0.00153
chr1_1	61800000	61900000	280	0.0028
chr1_1	61900000	62000000	105	0.00105
chr1_1	62000000	62100000	85	0.00085
chr1_1	62100000	62200000	167	0.00167
chr1_1	62200000	62300000	186	0.00186
chr1_1	62300000	62400000	133	0.00133
chr1_1	62400000	62500000	223	0.00223
chr1_1	62500000	62600000	114	0.00114
chr1_1	62600000	62700000	171	0.00171
chr1_1	62700000	62800000	104	0.00104
chr1_1	62800000	62900000	200	0.002
chr1_1	62900000	63000000	85	0.00085
chr1_1	63000000	63100000	90	0.0009
chr1_1	63100000	63200000	68	0.00068
chr1_1	63200000	63300000	78	0.00078
chr1_1	63300000	63400000	98	0.00098
chr1_1	63400000	63500000	99	0.00099
chr1_1	63500000	63600000	87	0.00087
chr1_1	63600000	63700000	155	0.00155
chr1_1	63700000	63800000	122	0.00122
chr1_1	63800000	63900000	172	0.00172
chr1_1	63900000	64000000	206	0.00206
chr1_1	64000000	64100000	279	0.00279
chr1_1	64100000	64200000	179	0.00179
chr1_1	64200000	64300000	177	0.00177
chr1_1	64300000	64400000	189	0.00189
chr1_1	64400000	64500000	265	0.00265
chr1_1	64500000	64600000	601	0.00601
chr1_1	64600000	64700000	494	0.00494
chr1_1	64700000	64800000	281	0.00281
chr1_1	64800000	64900000	268	0.00268
chr1_1	64900000	65000000	365	0.00365
chr1_1	65000000	65100000	232	0.00232
chr1_1	65100000	65200000	288	0.00288
chr1_1	65200000	65300000	98	0.00098
chr1_1	65300000	65400000	275	0.00275
chr1_1	65400000	65500000	278	0.00278
chr1_1	65500000	65600000	184	0.00184
chr1_1	65600000	65700000	155	0.00155
chr1_1	65700000	65800000	122	0.00122
chr1_1	65800000	65900000	331	0.00331
chr1_1	65900000	66000000	272	0.00272
chr1_1	66000000	66100000	224	0.00224
chr1_1	66100000	66200000	134	0.00134
chr1_1	66200000	66300000	162	0.00162
chr1_1	66300000	66400000	109	0.00109
chr1_1	66400000	66500000	88	0.00088
chr1_1	66500000	66600000	189	0.00189
chr1_1	66600000	66700000	256	0.00256
chr1_1	66700000	66800000	151	0.00151
chr1_1	66800000	66900000	263	0.00263
chr1_1	66900000	67000000	241	0.00241
chr1_1	67000000	67100000	255	0.00255
chr1_1	67100000	67200000	136	0.00136
chr1_1	67200000	67300000	105	0.00105
chr1_1	67300000	67400000	372	0.00372
chr1_1	67400000	67500000	340	0.0034
chr1_1	67500000	67600000	101	0.00101
chr1_1	67600000	67700000	143	0.00143
chr1_1	67700000	67800000	186	0.00186
chr1_1	67800000	67900000	170	0.0017
chr1_1	67900000	68000000	193	0.00193
chr1_1	68000000	68100000	229	0.00229
chr1_1	68100000	68200000	168	0.00168
chr1_1	68200000	68300000	275	0.00275
chr1_1	68300000	68400000	142	0.00142
chr1_1	68400000	68500000	85	0.00085
chr1_1	68500000	68600000	185	0.00185
chr1_1	68600000	68700000	182	0.00182
chr1_1	68700000	68800000	117	0.00117
chr1_1	68800000	68900000	120	0.0012
chr1_1	68900000	69000000	299	0.00299
chr1_1	69000000	69100000	219	0.00219
chr1_1	69100000	69200000	348	0.00348
chr1_1	69200000	69300000	354	0.00354
chr1_1	69300000	69400000	383	0.00383
chr1_1	69400000	69500000	274	0.00274
chr1_1	69500000	69600000	210	0.0021
chr1_1	69600000	69700000	369	0.00369
chr1_1	69700000	69800000	190	0.0019
chr1_1	69800000	69900000	376	0.00376
chr1_1	69900000	70000000	227	0.00227
chr1_1	70000000	70100000	175	0.00175
chr1_1	70100000	70200000	369	0.00369
chr1_1	70200000	70300000	141	0.00141
chr1_1	70300000	70400000	189	0.00189
chr1_1	70400000	70500000	106	0.00106
chr1_1	70500000	70600000	0	0
chr1_1	70600000	70700000	0	0
chr1_1	70700000	70800000	0	0
chr1_1	70800000	70900000	0	0
chr1_1	70900000	71000000	0	0
chr1_1	71000000	71100000	0	0
chr1_1	71100000	71200000	24	0.00024
chr1_1	71200000	71300000	122	0.00122
chr1_1	71300000	71400000	98	0.00098
chr1_1	71400000	71500000	207	0.00207
chr1_1	71500000	71600000	214	0.00214
chr1_1	71600000	71700000	89	0.00089
chr1_1	71700000	71800000	96	0.00096
chr1_1	71800000	71900000	78	0.00078
chr1_1	71900000	72000000	78	0.00078
chr1_1	72000000	72100000	99	0.00099
chr1_1	72100000	72200000	151	0.00151
chr1_1	72200000	72300000	132	0.00132
chr1_1	72300000	72400000	131	0.00131
chr1_1	72400000	72500000	124	0.00124
chr1_1	72500000	72600000	181	0.00181
chr1_1	72600000	72700000	143	0.00143
chr1_1	72700000	72800000	218	0.00218
chr1_1	72800000	72900000	157	0.00157
chr1_1	72900000	73000000	186	0.00186
chr1_1	73000000	73100000	158	0.00158
chr1_1	73100000	73200000	218	0.00218
chr1_1	73200000	73300000	187	0.00187
chr1_1	73300000	73400000	220	0.0022
chr1_1	73400000	73500000	220	0.0022
chr1_1	73500000	73600000	272	0.00272
chr1_1	73600000	73700000	264	0.00264
chr1_1	73700000	73800000	501	0.00501
chr1_1	73800000	73900000	212	0.00212
chr1_1	73900000	74000000	125	0.00125
chr1_1	74000000	74100000	155	0.00155
chr1_1	74100000	74200000	201	0.00201
chr1_1	74200000	74300000	77	0.00077
chr1_1	74300000	74400000	6	6e-05
chr1_1	74400000	74500000	0	0
chr1_1	74500000	74600000	0	0
chr1_1	74600000	74700000	3	3e-05
chr1_1	74700000	74800000	24	0.00024
chr1_1	74800000	74900000	355	0.00355
chr1_1	74900000	75000000	645	0.00645
chr1_1	75000000	75100000	401	0.00401
chr1_1	75100000	75200000	280	0.0028
chr1_1	75200000	75300000	377	0.00377
chr1_1	75300000	75400000	281	0.00281
chr1_1	75400000	75500000	385	0.00385
chr1_1	75500000	75600000	328	0.00328
chr1_1	75600000	75700000	524	0.00524
chr1_1	75700000	75800000	225	0.00225
chr1_1	75800000	75900000	126	0.00126
chr1_1	75900000	76000000	207	0.00207
chr1_1	76000000	76100000	242	0.00242
chr1_1	76100000	76200000	119	0.00119
chr1_1	76200000	76300000	142	0.00142
chr1_1	76300000	76400000	146	0.00146
chr1_1	76400000	76500000	204	0.00204
chr1_1	76500000	76600000	172	0.00172
chr1_1	76600000	76700000	131	0.00131
chr1_1	76700000	76800000	234	0.00234
chr1_1	76800000	76900000	173	0.00173
chr1_1	76900000	77000000	172	0.00172
chr1_1	77000000	77100000	208	0.00208
chr1_1	77100000	77200000	143	0.00143
chr1_1	77200000	77300000	127	0.00127
chr1_1	77300000	77400000	204	0.00204
chr1_1	77400000	77500000	119	0.00119
chr1_1	77500000	77600000	1	1e-05
chr1_1	77600000	77700000	0	0
chr1_1	77700000	77800000	56	0.00056
chr1_1	77800000	77900000	188	0.00188
chr1_1	77900000	78000000	229	0.00229
chr1_1	78000000	78100000	135	0.00135
chr1_1	78100000	78200000	36	0.00036
chr1_1	78200000	78300000	4	4e-05
chr1_1	78300000	78400000	0	0
chr1_1	78400000	78500000	2	2e-05
chr1_1	78500000	78600000	30	0.0003
chr1_1	78600000	78700000	131	0.00131
chr1_1	78700000	78800000	10	0.0001
chr1_1	78800000	78900000	0	0
chr1_1	78900000	79000000	109	0.00109
chr1_1	79000000	79100000	248	0.00248
chr1_1	79100000	79200000	123	0.00123
chr1_1	79200000	79300000	208	0.00208
chr1_1	79300000	79400000	385	0.00385
chr1_1	79400000	79500000	491	0.00491
chr1_1	79500000	79600000	362	0.00362
chr1_1	79600000	79700000	289	0.00289
chr1_1	79700000	79800000	316	0.00316
chr1_1	79800000	79900000	322	0.00322
chr1_1	79900000	80000000	635	0.00635
chr1_1	80000000	80100000	711	0.00711
chr1_1	80100000	80200000	459	0.00459
chr1_1	80200000	80300000	334	0.00334
chr1_1	80300000	80400000	232	0.00232
chr1_1	80400000	80500000	232	0.00232
chr1_1	80500000	80600000	15	0.00015
chr1_1	80600000	80700000	134	0.00134
chr1_1	80700000	80800000	377	0.00377
chr1_1	80800000	80900000	153	0.00153
chr1_1	80900000	81000000	124	0.00124
chr1_1	81000000	81100000	180	0.0018
chr1_1	81100000	81200000	254	0.00254
chr1_1	81200000	81300000	181	0.00181
chr1_1	81300000	81400000	30	0.0003
chr1_1	81400000	81500000	0	0
chr1_1	81500000	81600000	3	3e-05
chr1_1	81600000	81700000	0	0
chr1_1	81700000	81800000	0	0
chr1_1	81800000	81900000	0	0
chr1_1	81900000	82000000	1	1e-05
chr1_1	82000000	82100000	7	7e-05
chr1_1	82100000	82200000	1	1e-05
chr1_1	82200000	82300000	0	0
chr1_1	82300000	82400000	0	0
chr1_1	82400000	82500000	0	0
chr1_1	82500000	82600000	0	0
chr1_1	82600000	82700000	2	2e-05
chr1_1	82700000	82800000	0	0
chr1_1	82800000	82900000	6	6e-05
chr1_1	82900000	83000000	0	0
chr1_1	83000000	83100000	5	5e-05
chr1_1	83100000	83200000	2	2e-05
chr1_1	83200000	83300000	1	1e-05
chr1_1	83300000	83400000	3	3e-05
chr1_1	83400000	83500000	226	0.00226
chr1_1	83500000	83600000	151	0.00151
chr1_1	83600000	83700000	4	4e-05
chr1_1	83700000	83800000	147	0.00147
chr1_1	83800000	83900000	63	0.00063
chr1_1	83900000	84000000	0	0
chr1_1	84000000	84100000	0	0
chr1_1	84100000	84200000	0	0
chr1_1	84200000	84300000	0	0
chr1_1	84300000	84400000	0	0
chr1_1	84400000	84500000	12	0.00012
chr1_1	84500000	84600000	372	0.00372
chr1_1	84600000	84700000	418	0.00418
chr1_1	84700000	84800000	126	0.00126
chr1_1	84800000	84900000	2	2e-05
chr1_1	84900000	85000000	0	0
chr1_1	85000000	85100000	0	0
chr1_1	85100000	85200000	221	0.00221
chr1_1	85200000	85300000	371	0.00371
chr1_1	85300000	85400000	353	0.00353
chr1_1	85400000	85500000	470	0.0047
chr1_1	85500000	85600000	380	0.0038
chr1_1	85600000	85700000	527	0.00527
chr1_1	85700000	85800000	617	0.00617
chr1_1	85800000	85900000	221	0.00221
chr1_1	85900000	86000000	359	0.00359
chr1_1	86000000	86100000	252	0.00252
chr1_1	86100000	86200000	436	0.00436
chr1_1	86200000	86300000	521	0.00521
chr1_1	86300000	86400000	307	0.00307
chr1_1	86400000	86500000	358	0.00358
chr1_1	86500000	86600000	252	0.00252
chr1_1	86600000	86700000	424	0.00424
chr1_1	86700000	86800000	303	0.00303
chr1_1	86800000	86900000	224	0.00224
chr1_1	86900000	87000000	250	0.0025
chr1_1	87000000	87100000	186	0.00186
chr1_1	87100000	87200000	179	0.00179
chr1_1	87200000	87300000	183	0.00183
chr1_1	87300000	87400000	267	0.00267
chr1_1	87400000	87500000	86	0.00086
chr1_1	87500000	87600000	97	0.00097
chr1_1	87600000	87700000	120	0.0012
chr1_1	87700000	87800000	98	0.00098
chr1_1	87800000	87900000	207	0.00207
chr1_1	87900000	88000000	16	0.00016
chr1_1	88000000	88100000	1	1e-05
chr1_1	88100000	88200000	0	0
chr1_1	88200000	88300000	2	2e-05
chr1_1	88300000	88400000	38	0.00038
chr1_1	88400000	88500000	252	0.00252
chr1_1	88500000	88600000	326	0.00326
chr1_1	88600000	88700000	183	0.00183
chr1_1	88700000	88800000	271	0.00271
chr1_1	88800000	88900000	106	0.00106
chr1_1	88900000	89000000	42	0.00042
chr1_1	89000000	89100000	163	0.00163
chr1_1	89100000	89200000	169	0.00169
chr1_1	89200000	89300000	290	0.0029
chr1_1	89300000	89400000	75	0.00075
chr1_1	89400000	89500000	86	0.00086
chr1_1	89500000	89600000	104	0.00104
chr1_1	89600000	89700000	53	0.00053
chr1_1	89700000	89800000	2	2e-05
chr1_1	89800000	89900000	1	1e-05
chr1_1	89900000	90000000	28	0.00028
chr1_1	90000000	90100000	80	0.0008
chr1_1	90100000	90200000	161	0.00161
chr1_1	90200000	90300000	178	0.00178
chr1_1	90300000	90400000	149	0.00149
chr1_1	90400000	90500000	236	0.00236
chr1_1	90500000	90600000	352	0.00352
chr1_1	90600000	90700000	193	0.00193
chr1_1	90700000	90800000	266	0.00266
chr1_1	90800000	90900000	411	0.00411
chr1_1	90900000	91000000	518	0.00518
chr1_1	91000000	91100000	515	0.00515
chr1_1	91100000	91200000	506	0.00506
chr1_1	91200000	91300000	485	0.00485
chr1_1	91300000	91400000	585	0.00585
chr1_1	91400000	91500000	372	0.00372
chr1_1	91500000	91600000	487	0.00487
chr1_1	91600000	91700000	443	0.00443
chr1_1	91700000	91800000	432	0.00432
chr1_1	91800000	91900000	592	0.00592
chr1_1	91900000	92000000	498	0.00498
chr1_1	92000000	92100000	237	0.00237
chr1_1	92100000	92200000	321	0.00321
chr1_1	92200000	92300000	342	0.00342
chr1_1	92300000	92400000	757	0.00757
chr1_1	92400000	92500000	514	0.00514
chr1_1	92500000	92600000	99	0.00099
chr1_1	92600000	92700000	0	0
chr1_1	92700000	92800000	0	0
chr1_1	92800000	92900000	93	0.00093
chr1_1	92900000	93000000	288	0.00288
chr1_1	93000000	93100000	245	0.00245
chr1_1	93100000	93200000	242	0.00242
chr1_1	93200000	93300000	408	0.00408
chr1_1	93300000	93400000	547	0.00547
chr1_1	93400000	93500000	578	0.00578
chr1_1	93500000	93600000	706	0.00706
chr1_1	93600000	93700000	362	0.00362
chr1_1	93700000	93800000	533	0.00533
chr1_1	93800000	93900000	502	0.00502
chr1_1	93900000	94000000	470	0.0047
chr1_1	94000000	94100000	421	0.00421
chr1_1	94100000	94200000	481	0.00481
chr1_1	94200000	94300000	547	0.00547
chr1_1	94300000	94400000	517	0.00517
chr1_1	94400000	94500000	549	0.00549
chr1_1	94500000	94600000	591	0.00591
chr1_1	94600000	94700000	483	0.00483
chr1_1	94700000	94800000	584	0.00584
chr1_1	94800000	94900000	383	0.00383
chr1_1	94900000	95000000	596	0.00596
chr1_1	95000000	95100000	963	0.00963
chr1_1	95100000	95200000	142	0.00142
chr1_1	95200000	95300000	7	7e-05
chr1_1	95300000	95400000	2	2e-05
chr1_1	95400000	95500000	478	0.00478
chr1_1	95500000	95600000	587	0.00587
chr1_1	95600000	95700000	548	0.00548
chr1_1	95700000	95800000	471	0.00471
chr1_1	95800000	95900000	484	0.00484
chr1_1	95900000	96000000	411	0.00411
chr1_1	96000000	96100000	341	0.00341
chr1_1	96100000	96200000	649	0.00649
chr1_1	96200000	96300000	342	0.00342
chr1_1	96300000	96400000	185	0.00185
chr1_1	96400000	96500000	135	0.00135
chr1_1	96500000	96600000	100	0.001
chr1_1	96600000	96700000	146	0.00146
chr1_1	96700000	96800000	3	3e-05
chr1_1	96800000	96900000	0	0
chr1_1	96900000	97000000	78	0.00078
chr1_1	97000000	97100000	0	0
chr1_1	97100000	97200000	84	0.00084
chr1_1	97200000	97300000	45	0.00045
chr1_1	97300000	97400000	1	1e-05
chr1_1	97400000	97500000	173	0.00173
chr1_1	97500000	97600000	296	0.00296
chr1_1	97600000	97700000	257	0.00257
chr1_1	97700000	97800000	285	0.00285
chr1_1	97800000	97900000	442	0.00442
chr1_1	97900000	98000000	570	0.0057
chr1_1	98000000	98100000	257	0.00257
chr1_1	98100000	98200000	321	0.00321
chr1_1	98200000	98300000	696	0.00696
chr1_1	98300000	98400000	361	0.00361
chr1_1	98400000	98500000	468	0.00468
chr1_1	98500000	98600000	316	0.00316
chr1_1	98600000	98700000	147	0.00147
chr1_1	98700000	98800000	147	0.00147
chr1_1	98800000	98900000	150	0.0015
chr1_1	98900000	99000000	197	0.00197
chr1_1	99000000	99100000	215	0.00215
chr1_1	99100000	99200000	340	0.0034
chr1_1	99200000	99300000	113	0.00113
chr1_1	99300000	99400000	87	0.00087
chr1_1	99400000	99471857	65	0.00065
chr1_2	0	100000	1	1e-05
chr1_2	100000	200000	11	0.00011
chr1_2	200000	300000	1	1e-05
chr1_2	300000	400000	2	2e-05
chr1_2	400000	500000	33	0.00033
chr1_2	500000	600000	62	0.00062
chr1_2	600000	700000	25	0.00025
chr1_2	700000	800000	0	0
chr1_2	800000	900000	1	1e-05
chr1_2	900000	1000000	1	1e-05
chr1_2	1000000	1100000	2	2e-05
chr1_2	1100000	1200000	0	0
chr1_2	1200000	1300000	18	0.00018
chr1_2	1300000	1400000	3	3e-05
chr1_2	1400000	1500000	4	4e-05
chr1_2	1500000	1600000	123	0.00123
chr1_2	1600000	1700000	4	4e-05
chr1_2	1700000	1800000	267	0.00267
chr1_2	1800000	1900000	245	0.00245
chr1_2	1900000	2000000	123	0.00123
chr1_2	2000000	2100000	280	0.0028
chr1_2	2100000	2200000	179	0.00179
chr1_2	2200000	2300000	71	0.00071
chr1_2	2300000	2400000	0	0
chr1_2	2400000	2500000	0	0
chr1_2	2500000	2600000	11	0.00011
chr1_2	2600000	2700000	7	7e-05
chr1_2	2700000	2800000	55	0.00055
chr1_2	2800000	2900000	108	0.00108
chr1_2	2900000	3000000	241	0.00241
chr1_2	3000000	3100000	200	0.002
chr1_2	3100000	3200000	243	0.00243
chr1_2	3200000	3300000	307	0.00307
chr1_2	3300000	3400000	346	0.00346
chr1_2	3400000	3500000	328	0.00328
chr1_2	3500000	3600000	140	0.0014
chr1_2	3600000	3700000	609	0.00609
chr1_2	3700000	3800000	471	0.00471
chr1_2	3800000	3900000	304	0.00304
chr1_2	3900000	4000000	300	0.003
chr1_2	4000000	4100000	342	0.00342
chr1_2	4100000	4200000	118	0.00118
chr1_2	4200000	4300000	279	0.00279
chr1_2	4300000	4400000	197	0.00197
chr1_2	4400000	4500000	251	0.00251
chr1_2	4500000	4600000	281	0.00281
chr1_2	4600000	4700000	343	0.00343
chr1_2	4700000	4800000	403	0.00403
chr1_2	4800000	4900000	437	0.00437
chr1_2	4900000	5000000	401	0.00401
chr1_2	5000000	5100000	305	0.00305
chr1_2	5100000	5200000	422	0.00422
chr1_2	5200000	5300000	315	0.00315
chr1_2	5300000	5400000	318	0.00318
chr1_2	5400000	5500000	643	0.00643
chr1_2	5500000	5600000	504	0.00504
chr1_2	5600000	5700000	415	0.00415
chr1_2	5700000	5800000	251	0.00251
chr1_2	5800000	5900000	323	0.00323
chr1_2	5900000	6000000	435	0.00435
chr1_2	6000000	6100000	394	0.00394
chr1_2	6100000	6200000	314	0.00314
chr1_2	6200000	6300000	431	0.00431
chr1_2	6300000	6400000	314	0.00314
chr1_2	6400000	6500000	302	0.00302
chr1_2	6500000	6600000	324	0.00324
chr1_2	6600000	6700000	504	0.00504
chr1_2	6700000	6800000	90	0.0009
chr1_2	6800000	6900000	310	0.0031
chr1_2	6900000	7000000	6	6e-05
chr1_2	7000000	7100000	210	0.0021
chr1_2	7100000	7200000	380	0.0038
chr1_2	7200000	7300000	738	0.00738
chr1_2	7300000	7400000	363	0.00363
chr1_2	7400000	7500000	275	0.00275
chr1_2	7500000	7600000	428	0.00428
chr1_2	7600000	7700000	262	0.00262
chr1_2	7700000	7800000	408	0.00408
chr1_2	7800000	7900000	398	0.00398
chr1_2	7900000	8000000	504	0.00504
chr1_2	8000000	8100000	536	0.00536
chr1_2	8100000	8200000	424	0.00424
chr1_2	8200000	8300000	220	0.0022
chr1_2	8300000	8400000	190	0.0019
chr1_2	8400000	8500000	352	0.00352
chr1_2	8500000	8600000	138	0.00138
chr1_2	8600000	8700000	89	0.00089
chr1_2	8700000	8800000	118	0.00118
chr1_2	8800000	8900000	59	0.00059
chr1_2	8900000	9000000	52	0.00052
chr1_2	9000000	9100000	36	0.00036
chr1_2	9100000	9200000	73	0.00073
chr1_2	9200000	9300000	53	0.00053
chr1_2	9300000	9400000	26	0.00026
chr1_2	9400000	9500000	57	0.00057
chr1_2	9500000	9600000	226	0.00226
chr1_2	9600000	9700000	222	0.00222
chr1_2	9700000	9800000	323	0.00323
chr1_2	9800000	9900000	4	4e-05
chr1_2	9900000	10000000	2	2e-05
chr1_2	10000000	10100000	0	0
chr1_2	10100000	10200000	1	1e-05
chr1_2	10200000	10300000	29	0.00029
chr1_2	10300000	10400000	1	1e-05
chr1_2	10400000	10500000	160	0.0016
chr1_2	10500000	10600000	410	0.0041
chr1_2	10600000	10700000	342	0.00342
chr1_2	10700000	10800000	502	0.00502
chr1_2	10800000	10900000	409	0.00409
chr1_2	10900000	11000000	319	0.00319
chr1_2	11000000	11100000	345	0.00345
chr1_2	11100000	11200000	458	0.00458
chr1_2	11200000	11300000	409	0.00409
chr1_2	11300000	11400000	425	0.00425
chr1_2	11400000	11500000	206	0.00206
chr1_2	11500000	11600000	357	0.00357
chr1_2	11600000	11700000	558	0.00558
chr1_2	11700000	11800000	367	0.00367
chr1_2	11800000	11900000	0	0
chr1_2	11900000	12000000	0	0
chr1_2	12000000	12100000	0	0
chr1_2	12100000	12200000	0	0
chr1_2	12200000	12300000	0	0
chr1_2	12300000	12400000	2	2e-05
chr1_2	12400000	12500000	0	0
chr1_2	12500000	12600000	1	1e-05
chr1_2	12600000	12700000	0	0
chr1_2	12700000	12800000	151	0.00151
chr1_2	12800000	12900000	25	0.00025
chr1_2	12900000	13000000	94	0.00094
chr1_2	13000000	13100000	16	0.00016
chr1_2	13100000	13200000	144	0.00144
chr1_2	13200000	13300000	134	0.00134
chr1_2	13300000	13400000	172	0.00172
chr1_2	13400000	13500000	95	0.00095
chr1_2	13500000	13600000	56	0.00056
chr1_2	13600000	13700000	82	0.00082
chr1_2	13700000	13800000	80	0.0008
chr1_2	13800000	13900000	3	3e-05
chr1_2	13900000	14000000	2	2e-05
chr1_2	14000000	14100000	4	4e-05
chr1_2	14100000	14200000	2	2e-05
chr1_2	14200000	14300000	2	2e-05
chr1_2	14300000	14400000	3	3e-05
chr1_2	14400000	14500000	10	0.0001
chr1_2	14500000	14600000	0	0
chr1_2	14600000	14700000	7	7e-05
chr1_2	14700000	14800000	0	0
chr1_2	14800000	14900000	0	0
chr1_2	14900000	15000000	1	1e-05
chr1_2	15000000	15100000	71	0.00071
chr1_2	15100000	15200000	218	0.00218
chr1_2	15200000	15300000	183	0.00183
chr1_2	15300000	15400000	360	0.0036
chr1_2	15400000	15500000	201	0.00201
chr1_2	15500000	15600000	12	0.00012
chr1_2	15600000	15700000	2	2e-05
chr1_2	15700000	15800000	1	1e-05
chr1_2	15800000	15900000	46	0.00046
chr1_2	15900000	16000000	214	0.00214
chr1_2	16000000	16100000	166	0.00166
chr1_2	16100000	16200000	271	0.00271
chr1_2	16200000	16300000	296	0.00296
chr1_2	16300000	16400000	386	0.00386
chr1_2	16400000	16500000	264	0.00264
chr1_2	16500000	16600000	339	0.00339
chr1_2	16600000	16700000	429	0.00429
chr1_2	16700000	16800000	335	0.00335
chr1_2	16800000	16900000	278	0.00278
chr1_2	16900000	17000000	250	0.0025
chr1_2	17000000	17100000	217	0.00217
chr1_2	17100000	17200000	266	0.00266
chr1_2	17200000	17300000	155	0.00155
chr1_2	17300000	17400000	135	0.00135
chr1_2	17400000	17500000	126	0.00126
chr1_2	17500000	17600000	127	0.00127
chr1_2	17600000	17700000	155	0.00155
chr1_2	17700000	17800000	127	0.00127
chr1_2	17800000	17900000	43	0.00043
chr1_2	17900000	18000000	84	0.00084
chr1_2	18000000	18100000	238	0.00238
chr1_2	18100000	18200000	290	0.0029
chr1_2	18200000	18300000	275	0.00275
chr1_2	18300000	18400000	214	0.00214
chr1_2	18400000	18500000	170	0.0017
chr1_2	18500000	18600000	191	0.00191
chr1_2	18600000	18700000	180	0.0018
chr1_2	18700000	18800000	175	0.00175
chr1_2	18800000	18900000	178	0.00178
chr1_2	18900000	19000000	185	0.00185
chr1_2	19000000	19100000	370	0.0037
chr1_2	19100000	19200000	353	0.00353
chr1_2	19200000	19300000	398	0.00398
chr1_2	19300000	19400000	235	0.00235
chr1_2	19400000	19500000	389	0.00389
chr1_2	19500000	19600000	282	0.00282
chr1_2	19600000	19700000	220	0.0022
chr1_2	19700000	19800000	346	0.00346
chr1_2	19800000	19900000	273	0.00273
chr1_2	19900000	20000000	129	0.00129
chr1_2	20000000	20100000	120	0.0012
chr1_2	20100000	20200000	289	0.00289
chr1_2	20200000	20300000	273	0.00273
chr1_2	20300000	20400000	154	0.00154
chr1_2	20400000	20500000	256	0.00256
chr1_2	20500000	20600000	342	0.00342
chr1_2	20600000	20700000	367	0.00367
chr1_2	20700000	20800000	221	0.00221
chr1_2	20800000	20900000	218	0.00218
chr1_2	20900000	21000000	152	0.00152
chr1_2	21000000	21100000	126	0.00126
chr1_2	21100000	21200000	181	0.00181
chr1_2	21200000	21300000	207	0.00207
chr1_2	21300000	21400000	185	0.00185
chr1_2	21400000	21500000	199	0.00199
chr1_2	21500000	21600000	114	0.00114
chr1_2	21600000	21700000	152	0.00152
chr1_2	21700000	21800000	271	0.00271
chr1_2	21800000	21900000	496	0.00496
chr1_2	21900000	22000000	339	0.00339
chr1_2	22000000	22100000	122	0.00122
chr1_2	22100000	22200000	227	0.00227
chr1_2	22200000	22300000	277	0.00277
chr1_2	22300000	22400000	238	0.00238
chr1_2	22400000	22500000	203	0.00203
chr1_2	22500000	22600000	185	0.00185
chr1_2	22600000	22700000	266	0.00266
chr1_2	22700000	22800000	180	0.0018
chr1_2	22800000	22900000	294	0.00294
chr1_2	22900000	23000000	214	0.00214
chr1_2	23000000	23100000	145	0.00145
chr1_2	23100000	23200000	234	0.00234
chr1_2	23200000	23300000	179	0.00179
chr1_2	23300000	23400000	165	0.00165
chr1_2	23400000	23500000	106	0.00106
chr1_2	23500000	23600000	272	0.00272
chr1_2	23600000	23700000	129	0.00129
chr1_2	23700000	23800000	217	0.00217
chr1_2	23800000	23900000	198	0.00198
chr1_2	23900000	24000000	78	0.00078
chr1_2	24000000	24100000	82	0.00082
chr1_2	24100000	24200000	79	0.00079
chr1_2	24200000	24300000	156	0.00156
chr1_2	24300000	24400000	122	0.00122
chr1_2	24400000	24500000	82	0.00082
chr1_2	24500000	24600000	207	0.00207
chr1_2	24600000	24700000	162	0.00162
chr1_2	24700000	24800000	165	0.00165
chr1_2	24800000	24900000	166	0.00166
chr1_2	24900000	25000000	349	0.00349
chr1_2	25000000	25100000	254	0.00254
chr1_2	25100000	25200000	103	0.00103
chr1_2	25200000	25300000	108	0.00108
chr1_2	25300000	25400000	159	0.00159
chr1_2	25400000	25500000	99	0.00099
chr1_2	25500000	25600000	149	0.00149
chr1_2	25600000	25700000	200	0.002
chr1_2	25700000	25800000	167	0.00167
chr1_2	25800000	25900000	100	0.001
chr1_2	25900000	26000000	137	0.00137
chr1_2	26000000	26100000	128	0.00128
chr1_2	26100000	26200000	127	0.00127
chr1_2	26200000	26300000	89	0.00089
chr1_2	26300000	26400000	108	0.00108
chr1_2	26400000	26500000	136	0.00136
chr1_2	26500000	26600000	130	0.0013
chr1_2	26600000	26700000	109	0.00109
chr1_2	26700000	26800000	141	0.00141
chr1_2	26800000	26900000	235	0.00235
chr1_2	26900000	27000000	185	0.00185
chr1_2	27000000	27100000	219	0.00219
chr1_2	27100000	27200000	162	0.00162
chr1_2	27200000	27300000	130	0.0013
chr1_2	27300000	27400000	88	0.00088
chr1_2	27400000	27500000	107	0.00107
chr1_2	27500000	27600000	129	0.00129
chr1_2	27600000	27700000	62	0.00062
chr1_2	27700000	27800000	83	0.00083
chr1_2	27800000	27900000	132	0.00132
chr1_2	27900000	28000000	70	0.0007
chr1_2	28000000	28100000	58	0.00058
chr1_2	28100000	28200000	61	0.00061
chr1_2	28200000	28300000	67	0.00067
chr1_2	28300000	28400000	54	0.00054
chr1_2	28400000	28500000	43	0.00043
chr1_2	28500000	28600000	79	0.00079
chr1_2	28600000	28700000	89	0.00089
chr1_2	28700000	28800000	68	0.00068
chr1_2	28800000	28900000	61	0.00061
chr1_2	28900000	29000000	57	0.00057
chr1_2	29000000	29100000	128	0.00128
chr1_2	29100000	29200000	152	0.00152
chr1_2	29200000	29300000	228	0.00228
chr1_2	29300000	29400000	241	0.00241
chr1_2	29400000	29500000	228	0.00228
chr1_2	29500000	29600000	180	0.0018
chr1_2	29600000	29700000	173	0.00173
chr1_2	29700000	29800000	182	0.00182
chr1_2	29800000	29900000	264	0.00264
chr1_2	29900000	30000000	290	0.0029
chr1_2	30000000	30100000	220	0.0022
chr1_2	30100000	30200000	89	0.00089
chr1_2	30200000	30300000	22	0.00022
chr1_2	30300000	30400000	0	0
chr1_2	30400000	30500000	72	0.00072
chr1_2	30500000	30600000	60	0.0006
chr1_2	30600000	30700000	72	0.00072
chr1_2	30700000	30800000	12	0.00012
chr1_2	30800000	30900000	13	0.00013
chr1_2	30900000	31000000	23	0.00023
chr1_2	31000000	31100000	23	0.00023
chr1_2	31100000	31200000	0	0
chr1_2	31200000	31300000	0	0
chr1_2	31300000	31400000	0	0
chr1_2	31400000	31500000	0	0
chr1_2	31500000	31600000	0	0
chr1_2	31600000	31700000	0	0
chr1_2	31700000	31800000	0	0
chr1_2	31800000	31900000	205	0.00205
chr1_2	31900000	32000000	254	0.00254
chr1_2	32000000	32100000	406	0.00406
chr1_2	32100000	32200000	398	0.00398
chr1_2	32200000	32300000	265	0.00265
chr1_2	32300000	32400000	455	0.00455
chr1_2	32400000	32500000	177	0.00177
chr1_2	32500000	32600000	466	0.00466
chr1_2	32600000	32700000	390	0.0039
chr1_2	32700000	32800000	438	0.00438
chr1_2	32800000	32900000	384	0.00384
chr1_2	32900000	33000000	651	0.00651
chr1_2	33000000	33100000	373	0.00373
chr1_2	33100000	33200000	436	0.00436
chr1_2	33200000	33300000	398	0.00398
chr1_2	33300000	33400000	334	0.00334
chr1_2	33400000	33500000	332	0.00332
chr1_2	33500000	33600000	229	0.00229
chr1_2	33600000	33700000	255	0.00255
chr1_2	33700000	33800000	227	0.00227
chr1_2	33800000	33900000	183	0.00183
chr1_2	33900000	34000000	323	0.00323
chr1_2	34000000	34100000	380	0.0038
chr1_2	34100000	34200000	386	0.00386
chr1_2	34200000	34300000	321	0.00321
chr1_2	34300000	34400000	251	0.00251
chr1_2	34400000	34500000	338	0.00338
chr1_2	34500000	34600000	207	0.00207
chr1_2	34600000	34700000	111	0.00111
chr1_2	34700000	34800000	314	0.00314
chr1_2	34800000	34900000	288	0.00288
chr1_2	34900000	35000000	323	0.00323
chr1_2	35000000	35100000	367	0.00367
chr1_2	35100000	35200000	395	0.00395
chr1_2	35200000	35300000	416	0.00416
chr1_2	35300000	35400000	425	0.00425
chr1_2	35400000	35500000	414	0.00414
chr1_2	35500000	35600000	503	0.00503
chr1_2	35600000	35700000	487	0.00487
chr1_2	35700000	35800000	369	0.00369
chr1_2	35800000	35900000	449	0.00449
chr1_2	35900000	36000000	314	0.00314
chr1_2	36000000	36100000	322	0.00322
chr1_2	36100000	36200000	311	0.00311
chr1_2	36200000	36300000	187	0.00187
chr1_2	36300000	36400000	386	0.00386
chr1_2	36400000	36500000	349	0.00349
chr1_2	36500000	36600000	536	0.00536
chr1_2	36600000	36700000	361	0.00361
chr1_2	36700000	36800000	147	0.00147
chr1_2	36800000	36900000	151	0.00151
chr1_2	36900000	37000000	387	0.00387
chr1_2	37000000	37100000	211	0.00211
chr1_2	37100000	37200000	408	0.00408
chr1_2	37200000	37300000	602	0.00602
chr1_2	37300000	37400000	328	0.00328
chr1_2	37400000	37500000	507	0.00507
chr1_2	37500000	37600000	291	0.00291
chr1_2	37600000	37700000	332	0.00332
chr1_2	37700000	37800000	148	0.00148
chr1_2	37800000	37900000	105	0.00105
chr1_2	37900000	38000000	208	0.00208
chr1_2	38000000	38100000	84	0.00084
chr1_2	38100000	38200000	212	0.00212
chr1_2	38200000	38300000	252	0.00252
chr1_2	38300000	38400000	408	0.00408
chr1_2	38400000	38500000	102	0.00102
chr1_2	38500000	38600000	96	0.00096
chr1_2	38600000	38700000	109	0.00109
chr1_2	38700000	38800000	43	0.00043
chr1_2	38800000	38900000	294	0.00294
chr1_2	38900000	39000000	395	0.00395
chr1_2	39000000	39100000	280	0.0028
chr1_2	39100000	39200000	191	0.00191
chr1_2	39200000	39300000	302	0.00302
chr1_2	39300000	39400000	275	0.00275
chr1_2	39400000	39500000	280	0.0028
chr1_2	39500000	39600000	287	0.00287
chr1_2	39600000	39700000	411	0.00411
chr1_2	39700000	39800000	347	0.00347
chr1_2	39800000	39900000	298	0.00298
chr1_2	39900000	40000000	244	0.00244
chr1_2	40000000	40100000	89	0.00089
chr1_2	40100000	40200000	157	0.00157
chr1_2	40200000	40300000	270	0.0027
chr1_2	40300000	40400000	357	0.00357
chr1_2	40400000	40500000	552	0.00552
chr1_2	40500000	40600000	327	0.00327
chr1_2	40600000	40700000	546	0.00546
chr1_2	40700000	40800000	389	0.00389
chr1_2	40800000	40900000	127	0.00127
chr1_2	40900000	41000000	67	0.00067
chr1_2	41000000	41100000	128	0.00128
chr1_2	41100000	41200000	158	0.00158
chr1_2	41200000	41300000	64	0.00064
chr1_2	41300000	41400000	86	0.00086
chr1_2	41400000	41500000	207	0.00207
chr1_2	41500000	41600000	149	0.00149
chr1_2	41600000	41700000	84	0.00084
chr1_2	41700000	41800000	47	0.00047
chr1_2	41800000	41900000	64	0.00064
chr1_2	41900000	42000000	24	0.00024
chr1_2	42000000	42100000	89	0.00089
chr1_2	42100000	42200000	83	0.00083
chr1_2	42200000	42300000	93	0.00093
chr1_2	42300000	42400000	163	0.00163
chr1_2	42400000	42500000	434	0.00434
chr1_2	42500000	42600000	88	0.00088
chr1_2	42600000	42700000	72	0.00072
chr1_2	42700000	42800000	44	0.00044
chr1_2	42800000	42900000	129	0.00129
chr1_2	42900000	43000000	389	0.00389
chr1_2	43000000	43100000	273	0.00273
chr1_2	43100000	43200000	68	0.00068
chr1_2	43200000	43300000	75	0.00075
chr1_2	43300000	43400000	31	0.00031
chr1_2	43400000	43500000	14	0.00014
chr1_2	43500000	43600000	111	0.00111
chr1_2	43600000	43700000	76	0.00076
chr1_2	43700000	43800000	99	0.00099
chr1_2	43800000	43900000	111	0.00111
chr1_2	43900000	44000000	63	0.00063
chr1_2	44000000	44100000	111	0.00111
chr1_2	44100000	44200000	41	0.00041
chr1_2	44200000	44300000	69	0.00069
chr1_2	44300000	44400000	45	0.00045
chr1_2	44400000	44500000	81	0.00081
chr1_2	44500000	44600000	115	0.00115
chr1_2	44600000	44700000	445	0.00445
chr1_2	44700000	44800000	347	0.00347
chr1_2	44800000	44900000	279	0.00279
chr1_2	44900000	45000000	445	0.00445
chr1_2	45000000	45100000	548	0.00548
chr1_2	45100000	45200000	381	0.00381
chr1_2	45200000	45300000	217	0.00217
chr1_2	45300000	45400000	278	0.00278
chr1_2	45400000	45500000	534	0.00534
chr1_2	45500000	45600000	535	0.00535
chr1_2	45600000	45700000	507	0.00507
chr1_2	45700000	45800000	531	0.00531
chr1_2	45800000	45900000	393	0.00393
chr1_2	45900000	46000000	393	0.00393
chr1_2	46000000	46100000	239	0.00239
chr1_2	46100000	46200000	531	0.00531
chr1_2	46200000	46300000	506	0.00506
chr1_2	46300000	46400000	206	0.00206
chr1_2	46400000	46500000	217	0.00217
chr1_2	46500000	46600000	299	0.00299
chr1_2	46600000	46700000	304	0.00304
chr1_2	46700000	46800000	480	0.0048
chr1_2	46800000	46900000	428	0.00428
chr1_2	46900000	47000000	243	0.00243
chr1_2	47000000	47100000	272	0.00272
chr1_2	47100000	47200000	347	0.00347
chr1_2	47200000	47300000	272	0.00272
chr1_2	47300000	47400000	374	0.00374
chr1_2	47400000	47500000	182	0.00182
chr1_2	47500000	47600000	327	0.00327
chr1_2	47600000	47700000	265	0.00265
chr1_2	47700000	47800000	207	0.00207
chr1_2	47800000	47900000	274	0.00274
chr1_2	47900000	48000000	172	0.00172
chr1_2	48000000	48100000	330	0.0033
chr1_2	48100000	48200000	436	0.00436
chr1_2	48200000	48300000	355	0.00355
chr1_2	48300000	48400000	163	0.00163
chr1_2	48400000	48500000	173	0.00173
chr1_2	48500000	48600000	209	0.00209
chr1_2	48600000	48700000	284	0.00284
chr1_2	48700000	48800000	247	0.00247
chr1_2	48800000	48900000	123	0.00123
chr1_2	48900000	49000000	117	0.00117
chr1_2	49000000	49100000	153	0.00153
chr1_2	49100000	49200000	156	0.00156
chr1_2	49200000	49300000	125	0.00125
chr1_2	49300000	49400000	82	0.00082
chr1_2	49400000	49500000	65	0.00065
chr1_2	49500000	49600000	87	0.00087
chr1_2	49600000	49700000	182	0.00182
chr1_2	49700000	49800000	395	0.00395
chr1_2	49800000	49900000	417	0.00417
chr1_2	49900000	50000000	402	0.00402
chr1_2	50000000	50100000	226	0.00226
chr1_2	50100000	50200000	170	0.0017
chr1_2	50200000	50300000	252	0.00252
chr1_2	50300000	50400000	281	0.00281
chr1_2	50400000	50500000	249	0.00249
chr1_2	50500000	50600000	300	0.003
chr1_2	50600000	50700000	135	0.00135
chr1_2	50700000	50800000	251	0.00251
chr1_2	50800000	50900000	198	0.00198
chr1_2	50900000	51000000	171	0.00171
chr1_2	51000000	51100000	204	0.00204
chr1_2	51100000	51200000	159	0.00159
chr1_2	51200000	51300000	153	0.00153
chr1_2	51300000	51400000	191	0.00191
chr1_2	51400000	51500000	196	0.00196
chr1_2	51500000	51600000	195	0.00195
chr1_2	51600000	51700000	277	0.00277
chr1_2	51700000	51800000	257	0.00257
chr1_2	51800000	51900000	198	0.00198
chr1_2	51900000	52000000	187	0.00187
chr1_2	52000000	52100000	165	0.00165
chr1_2	52100000	52200000	145	0.00145
chr1_2	52200000	52300000	231	0.00231
chr1_2	52300000	52400000	248	0.00248
chr1_2	52400000	52500000	224	0.00224
chr1_2	52500000	52600000	175	0.00175
chr1_2	52600000	52700000	147	0.00147
chr1_2	52700000	52800000	219	0.00219
chr1_2	52800000	52900000	126	0.00126
chr1_2	52900000	53000000	201	0.00201
chr1_2	53000000	53100000	266	0.00266
chr1_2	53100000	53200000	202	0.00202
chr1_2	53200000	53300000	206	0.00206
chr1_2	53300000	53400000	183	0.00183
chr1_2	53400000	53500000	129	0.00129
chr1_2	53500000	53600000	201	0.00201
chr1_2	53600000	53700000	136	0.00136
chr1_2	53700000	53800000	215	0.00215
chr1_2	53800000	53900000	177	0.00177
chr1_2	53900000	54000000	198	0.00198
chr1_2	54000000	54100000	157	0.00157
chr1_2	54100000	54200000	122	0.00122
chr1_2	54200000	54300000	225	0.00225
chr1_2	54300000	54400000	142	0.00142
chr1_2	54400000	54500000	176	0.00176
chr1_2	54500000	54600000	157	0.00157
chr1_2	54600000	54700000	193	0.00193
chr1_2	54700000	54800000	228	0.00228
chr1_2	54800000	54900000	185	0.00185
chr1_2	54900000	55000000	193	0.00193
chr1_2	55000000	55100000	189	0.00189
chr1_2	55100000	55200000	169	0.00169
chr1_2	55200000	55300000	186	0.00186
chr1_2	55300000	55400000	145	0.00145
chr1_2	55400000	55500000	180	0.0018
chr1_2	55500000	55600000	212	0.00212
chr1_2	55600000	55700000	225	0.00225
chr1_2	55700000	55800000	127	0.00127
chr1_2	55800000	55900000	140	0.0014
chr1_2	55900000	56000000	215	0.00215
chr1_2	56000000	56100000	228	0.00228
chr1_2	56100000	56200000	214	0.00214
chr1_2	56200000	56300000	214	0.00214
chr1_2	56300000	56400000	344	0.00344
chr1_2	56400000	56500000	242	0.00242
chr1_2	56500000	56600000	213	0.00213
chr1_2	56600000	56700000	472	0.00472
chr1_2	56700000	56800000	302	0.00302
chr1_2	56800000	56900000	175	0.00175
chr1_2	56900000	57000000	153	0.00153
chr1_2	57000000	57100000	230	0.0023
chr1_2	57100000	57200000	266	0.00266
chr1_2	57200000	57300000	264	0.00264
chr1_2	57300000	57400000	259	0.00259
chr1_2	57400000	57500000	184	0.00184
chr1_2	57500000	57600000	190	0.0019
chr1_2	57600000	57700000	268	0.00268
chr1_2	57700000	57800000	231	0.00231
chr1_2	57800000	57900000	361	0.00361
chr1_2	57900000	58000000	217	0.00217
chr1_2	58000000	58100000	194	0.00194
chr1_2	58100000	58200000	432	0.00432
chr1_2	58200000	58300000	256	0.00256
chr1_2	58300000	58400000	137	0.00137
chr1_2	58400000	58500000	164	0.00164
chr1_2	58500000	58600000	264	0.00264
chr1_2	58600000	58700000	382	0.00382
chr1_2	58700000	58800000	144	0.00144
chr1_2	58800000	58900000	202	0.00202
chr1_2	58900000	59000000	596	0.00596
chr1_2	59000000	59100000	368	0.00368
chr1_2	59100000	59200000	355	0.00355
chr1_2	59200000	59300000	267	0.00267
chr1_2	59300000	59400000	205	0.00205
chr1_2	59400000	59500000	226	0.00226
chr1_2	59500000	59600000	189	0.00189
chr1_2	59600000	59700000	378	0.00378
chr1_2	59700000	59800000	345	0.00345
chr1_2	59800000	59900000	284	0.00284
chr1_2	59900000	60000000	260	0.0026
chr1_2	60000000	60100000	202	0.00202
chr1_2	60100000	60200000	153	0.00153
chr1_2	60200000	60300000	599	0.00599
chr1_2	60300000	60400000	445	0.00445
chr1_2	60400000	60500000	311	0.00311
chr1_2	60500000	60600000	533	0.00533
chr1_2	60600000	60700000	352	0.00352
chr1_2	60700000	60800000	347	0.00347
chr1_2	60800000	60900000	303	0.00303
chr1_2	60900000	61000000	380	0.0038
chr1_2	61000000	61100000	456	0.00456
chr1_2	61100000	61200000	331	0.00331
chr1_2	61200000	61300000	498	0.00498
chr1_2	61300000	61400000	283	0.00283
chr1_2	61400000	61500000	196	0.00196
chr1_2	61500000	61600000	115	0.00115
chr1_2	61600000	61700000	214	0.00214
chr1_2	61700000	61800000	339	0.00339
chr1_2	61800000	61900000	158	0.00158
chr1_2	61900000	62000000	229	0.00229
chr1_2	62000000	62100000	283	0.00283
chr1_2	62100000	62200000	358	0.00358
chr1_2	62200000	62300000	63	0.00063
chr1_2	62300000	62400000	68	0.00068
chr1_2	62400000	62500000	79	0.00079
chr1_2	62500000	62600000	88	0.00088
chr1_2	62600000	62700000	123	0.00123
chr1_2	62700000	62800000	27	0.00027
chr1_2	62800000	62900000	246	0.00246
chr1_2	62900000	63000000	379	0.00379
chr1_2	63000000	63100000	270	0.0027
chr1_2	63100000	63200000	285	0.00285
chr1_2	63200000	63300000	301	0.00301
chr1_2	63300000	63400000	343	0.00343
chr1_2	63400000	63500000	472	0.00472
chr1_2	63500000	63600000	250	0.0025
chr1_2	63600000	63700000	164	0.00164
chr1_2	63700000	63800000	231	0.00231
chr1_2	63800000	63900000	364	0.00364
chr1_2	63900000	64000000	8	8e-05
chr1_2	64000000	64100000	1	1e-05
chr1_2	64100000	64200000	210	0.0021
chr1_2	64200000	64300000	439	0.00439
chr1_2	64300000	64400000	350	0.0035
chr1_2	64400000	64500000	348	0.00348
chr1_2	64500000	64600000	217	0.00217
chr1_2	64600000	64700000	275	0.00275
chr1_2	64700000	64800000	207	0.00207
chr1_2	64800000	64900000	368	0.00368
chr1_2	64900000	65000000	244	0.00244
chr1_2	65000000	65100000	164	0.00164
chr1_2	65100000	65200000	351	0.00351
chr1_2	65200000	65300000	382	0.00382
chr1_2	65300000	65400000	525	0.00525
chr1_2	65400000	65500000	606	0.00606
chr1_2	65500000	65600000	561	0.00561
chr1_2	65600000	65700000	361	0.00361
chr1_2	65700000	65800000	288	0.00288
chr1_2	65800000	65900000	398	0.00398
chr1_2	65900000	66000000	354	0.00354
chr1_2	66000000	66100000	251	0.00251
chr1_2	66100000	66200000	287	0.00287
chr1_2	66200000	66300000	259	0.00259
chr1_2	66300000	66400000	323	0.00323
chr1_2	66400000	66500000	347	0.00347
chr1_2	66500000	66600000	309	0.00309
chr1_2	66600000	66700000	600	0.006
chr1_2	66700000	66800000	279	0.00279
chr1_2	66800000	66900000	389	0.00389
chr1_2	66900000	67000000	476	0.00476
chr1_2	67000000	67100000	324	0.00324
chr1_2	67100000	67200000	230	0.0023
chr1_2	67200000	67300000	283	0.00283
chr1_2	67300000	67400000	223	0.00223
chr1_2	67400000	67500000	228	0.00228
chr1_2	67500000	67600000	294	0.00294
chr1_2	67600000	67700000	329	0.00329
chr1_2	67700000	67800000	328	0.00328
chr1_2	67800000	67900000	336	0.00336
chr1_2	67900000	68000000	326	0.00326
chr1_2	68000000	68100000	374	0.00374
chr1_2	68100000	68200000	245	0.00245
chr1_2	68200000	68300000	156	0.00156
chr1_2	68300000	68400000	210	0.0021
chr1_2	68400000	68500000	135	0.00135
chr1_2	68500000	68600000	32	0.00032
chr1_2	68600000	68700000	6	6e-05
chr1_2	68700000	68800000	0	0
chr1_2	68800000	68900000	1	1e-05
chr1_2	68900000	69000000	3	3e-05
chr1_2	69000000	69100000	46	0.00046
chr1_2	69100000	69200000	169	0.00169
chr1_2	69200000	69300000	19	0.00019
chr1_2	69300000	69400000	0	0
chr1_2	69400000	69500000	0	0
chr1_2	69500000	69600000	0	0
chr1_2	69600000	69700000	0	0
chr1_2	69700000	69800000	0	0
chr1_2	69800000	69900000	0	0
chr1_2	69900000	70000000	7	7e-05
chr1_2	70000000	70100000	153	0.00153
chr1_2	70100000	70200000	4	4e-05
chr1_2	70200000	70300000	0	0
chr1_2	70300000	70400000	0	0
chr1_2	70400000	70500000	42	0.00042
chr1_2	70500000	70600000	67	0.00067
chr1_2	70600000	70700000	142	0.00142
chr1_2	70700000	70800000	140	0.0014
chr1_2	70800000	70900000	143	0.00143
chr1_2	70900000	71000000	202	0.00202
chr1_2	71000000	71100000	109	0.00109
chr1_2	71100000	71200000	235	0.00235
chr1_2	71200000	71300000	260	0.0026
chr1_2	71300000	71400000	240	0.0024
chr1_2	71400000	71500000	161	0.00161
chr1_2	71500000	71600000	167	0.00167
chr1_2	71600000	71700000	178	0.00178
chr1_2	71700000	71800000	120	0.0012
chr1_2	71800000	71900000	207	0.00207
chr1_2	71900000	72000000	348	0.00348
chr1_2	72000000	72100000	227	0.00227
chr1_2	72100000	72200000	90	0.0009
chr1_2	72200000	72300000	102	0.00102
chr1_2	72300000	72400000	134	0.00134
chr1_2	72400000	72500000	129	0.00129
chr1_2	72500000	72600000	237	0.00237
chr1_2	72600000	72700000	0	0
chr1_2	72700000	72800000	0	0
chr1_2	72800000	72900000	0	0
chr1_2	72900000	73000000	2	2e-05
chr1_2	73000000	73100000	64	0.00064
chr1_2	73100000	73200000	351	0.00351
chr1_2	73200000	73300000	113	0.00113
chr1_2	73300000	73400000	2	2e-05
chr1_2	73400000	73500000	0	0
chr1_2	73500000	73600000	178	0.00178
chr1_2	73600000	73700000	186	0.00186
chr1_2	73700000	73800000	92	0.00092
chr1_2	73800000	73900000	53	0.00053
chr1_2	73900000	74000000	1	1e-05
chr1_2	74000000	74100000	332	0.00332
chr1_2	74100000	74200000	354	0.00354
chr1_2	74200000	74300000	128	0.00128
chr1_2	74300000	74400000	231	0.00231
chr1_2	74400000	74500000	139	0.00139
chr1_2	74500000	74600000	1	1e-05
chr1_2	74600000	74700000	19	0.00019
chr1_2	74700000	74800000	137	0.00137
chr1_2	74800000	74900000	170	0.0017
chr1_2	74900000	75000000	101	0.00101
chr1_2	75000000	75100000	221	0.00221
chr1_2	75100000	75200000	0	0
chr1_2	75200000	75300000	243	0.00243
chr1_2	75300000	75400000	242	0.00242
chr1_2	75400000	75500000	366	0.00366
chr1_2	75500000	75600000	180	0.0018
chr1_2	75600000	75700000	196	0.00196
chr1_2	75700000	75800000	240	0.0024
chr1_2	75800000	75900000	178	0.00178
chr1_2	75900000	76000000	219	0.00219
chr1_2	76000000	76100000	218	0.00218
chr1_2	76100000	76200000	334	0.00334
chr1_2	76200000	76300000	427	0.00427
chr1_2	76300000	76400000	498	0.00498
chr1_2	76400000	76500000	467	0.00467
chr1_2	76500000	76600000	487	0.00487
chr1_2	76600000	76700000	453	0.00453
chr1_2	76700000	76800000	335	0.00335
chr1_2	76800000	76900000	355	0.00355
chr1_2	76900000	77000000	374	0.00374
chr1_2	77000000	77100000	351	0.00351
chr1_2	77100000	77200000	538	0.00538
chr1_2	77200000	77300000	456	0.00456
chr1_2	77300000	77400000	410	0.0041
chr1_2	77400000	77500000	463	0.00463
chr1_2	77500000	77600000	338	0.00338
chr1_2	77600000	77700000	316	0.00316
chr1_2	77700000	77800000	242	0.00242
chr1_2	77800000	77900000	297	0.00297
chr1_2	77900000	78000000	394	0.00394
chr1_2	78000000	78100000	289	0.00289
chr1_2	78100000	78200000	255	0.00255
chr1_2	78200000	78300000	228	0.00228
chr1_2	78300000	78400000	303	0.00303
chr1_2	78400000	78500000	173	0.00173
chr1_2	78500000	78600000	181	0.00181
chr1_2	78600000	78700000	266	0.00266
chr1_2	78700000	78800000	374	0.00374
chr1_2	78800000	78900000	133	0.00133
chr1_2	78900000	79000000	434	0.00434
chr1_2	79000000	79100000	432	0.00432
chr1_2	79100000	79200000	360	0.0036
chr1_2	79200000	79300000	345	0.00345
chr1_2	79300000	79400000	831	0.00831
chr1_2	79400000	79500000	985	0.00985
chr1_2	79500000	79600000	745	0.00745
chr1_2	79600000	79700000	854	0.00854
chr1_2	79700000	79800000	534	0.00534
chr1_2	79800000	79900000	443	0.00443
chr1_2	79900000	80000000	107	0.00107
chr1_2	80000000	80100000	75	0.00075
chr1_2	80100000	80200000	405	0.00405
chr1_2	80200000	80300000	175	0.00175
chr1_2	80300000	80400000	247	0.00247
chr1_2	80400000	80500000	392	0.00392
chr1_2	80500000	80600000	209	0.00209
chr1_2	80600000	80700000	68	0.00068
chr1_2	80700000	80800000	411	0.00411
chr1_2	80800000	80900000	310	0.0031
chr1_2	80900000	81000000	528	0.00528
chr1_2	81000000	81100000	396	0.00396
chr1_2	81100000	81200000	698	0.00698
chr1_2	81200000	81300000	575	0.00575
chr1_2	81300000	81400000	510	0.0051
chr1_2	81400000	81500000	331	0.00331
chr1_2	81500000	81600000	499	0.00499
chr1_2	81600000	81700000	398	0.00398
chr1_2	81700000	81800000	618	0.00618
chr1_2	81800000	81900000	271	0.00271
chr1_2	81900000	82000000	590	0.0059
chr1_2	82000000	82100000	387	0.00387
chr1_2	82100000	82200000	308	0.00308
chr1_2	82200000	82300000	419	0.00419
chr1_2	82300000	82400000	417	0.00417
chr1_2	82400000	82500000	273	0.00273
chr1_2	82500000	82600000	308	0.00308
chr1_2	82600000	82700000	372	0.00372
chr1_2	82700000	82800000	521	0.00521
chr1_2	82800000	82900000	385	0.00385
chr1_2	82900000	83000000	507	0.00507
chr1_2	83000000	83100000	684	0.00684
chr1_2	83100000	83200000	644	0.00644
chr1_2	83200000	83300000	452	0.00452
chr1_2	83300000	83400000	475	0.00475
chr1_2	83400000	83500000	430	0.0043
chr1_2	83500000	83600000	348	0.00348
chr1_2	83600000	83700000	523	0.00523
chr1_2	83700000	83800000	375	0.00375
chr1_2	83800000	83900000	437	0.00437
chr1_2	83900000	84000000	520	0.0052
chr1_2	84000000	84100000	386	0.00386
chr1_2	84100000	84200000	320	0.0032
chr1_2	84200000	84300000	431	0.00431
chr1_2	84300000	84400000	489	0.00489
chr1_2	84400000	84500000	244	0.00244
chr1_2	84500000	84600000	262	0.00262
chr1_2	84600000	84700000	298	0.00298
chr1_2	84700000	84800000	375	0.00375
chr1_2	84800000	84900000	190	0.0019
chr1_2	84900000	85000000	199	0.00199
chr1_2	85000000	85100000	210	0.0021
chr1_2	85100000	85200000	220	0.0022
chr1_2	85200000	85300000	156	0.00156
chr1_2	85300000	85400000	0	0
chr1_2	85400000	85500000	0	0
chr1_2	85500000	85600000	0	0
chr1_2	85600000	85700000	0	0
chr1_2	85700000	85800000	0	0
chr1_2	85800000	85900000	0	0
chr1_2	85900000	86000000	0	0
chr1_2	86000000	86100000	9	9e-05
chr1_2	86100000	86200000	225	0.00225
chr1_2	86200000	86300000	238	0.00238
chr1_2	86300000	86400000	271	0.00271
chr1_2	86400000	86500000	223	0.00223
chr1_2	86500000	86600000	175	0.00175
chr1_2	86600000	86700000	189	0.00189
chr1_2	86700000	86800000	231	0.00231
chr1_2	86800000	86900000	331	0.00331
chr1_2	86900000	87000000	561	0.00561
chr1_2	87000000	87100000	531	0.00531
chr1_2	87100000	87200000	436	0.00436
chr1_2	87200000	87300000	337	0.00337
chr1_2	87300000	87400000	639	0.00639
chr1_2	87400000	87500000	599	0.00599
chr1_2	87500000	87600000	450	0.0045
chr1_2	87600000	87700000	21	0.00021
chr1_2	87700000	87800000	285	0.00285
chr1_2	87800000	87900000	0	0
chr1_2	87900000	88000000	0	0
chr1_2	88000000	88100000	2	2e-05
chr1_2	88100000	88200000	0	0
chr1_2	88200000	88300000	0	0
chr1_2	88300000	88400000	0	0
chr1_2	88400000	88500000	0	0
chr1_2	88500000	88600000	0	0
chr1_2	88600000	88700000	0	0
chr1_2	88700000	88800000	0	0
chr1_2	88800000	88900000	0	0
chr1_2	88900000	89000000	0	0
chr1_2	89000000	89100000	0	0
chr1_2	89100000	89200000	0	0
chr1_2	89200000	89300000	0	0
chr1_2	89300000	89400000	0	0
chr1_2	89400000	89500000	0	0
chr1_2	89500000	89600000	0	0
chr1_2	89600000	89700000	0	0
chr1_2	89700000	89800000	0	0
chr1_2	89800000	89900000	0	0
chr1_2	89900000	90000000	0	0
chr1_2	90000000	90100000	0	0
chr1_2	90100000	90200000	0	0
chr1_2	90200000	90300000	0	0
chr1_2	90300000	90400000	0	0
chr1_2	90400000	90500000	1	1e-05
chr1_2	90500000	90600000	0	0
chr1_2	90600000	90700000	33	0.00033
chr1_2	90700000	90800000	142	0.00142
chr1_2	90800000	90900000	126	0.00126
chr1_2	90900000	91000000	146	0.00146
chr1_2	91000000	91100000	211	0.00211
chr1_2	91100000	91200000	132	0.00132
chr1_2	91200000	91300000	0	0
chr1_2	91300000	91400000	0	0
chr1_2	91400000	91500000	272	0.00272
chr1_2	91500000	91600000	59	0.00059
chr1_2	91600000	91700000	9	9e-05
chr1_2	91700000	91800000	75	0.00075
chr1_2	91800000	91900000	64	0.00064
chr1_2	91900000	92000000	54	0.00054
chr1_2	92000000	92100000	324	0.00324
chr1_2	92100000	92200000	368	0.00368
chr1_2	92200000	92300000	243	0.00243
chr1_2	92300000	92400000	0	0
chr1_2	92400000	92500000	128	0.00128
chr1_2	92500000	92600000	54	0.00054
chr1_2	92600000	92700000	9	9e-05
chr1_2	92700000	92800000	2	2e-05
chr1_2	92800000	92900000	277	0.00277
chr1_2	92900000	93000000	277	0.00277
chr1_2	93000000	93100000	167	0.00167
chr1_2	93100000	93200000	177	0.00177
chr1_2	93200000	93300000	200	0.002
chr1_2	93300000	93400000	121	0.00121
chr1_2	93400000	93500000	170	0.0017
chr1_2	93500000	93600000	124	0.00124
chr1_2	93600000	93700000	93	0.00093
chr1_2	93700000	93800000	129	0.00129
chr1_2	93800000	93900000	1	1e-05
chr1_2	93900000	94000000	2	2e-05
chr1_2	94000000	94100000	0	0
chr1_2	94100000	94200000	1	1e-05
chr1_2	94200000	94256624	0	0
chr1_3	0	100000	3	3e-05
chr1_3	100000	200000	1	1e-05
chr1_3	200000	300000	0	0
chr1_3	300000	400000	45	0.00045
chr1_3	400000	500000	94	0.00094
chr1_3	500000	600000	6	6e-05
chr1_3	600000	700000	0	0
chr1_3	700000	800000	8	8e-05
chr1_3	800000	900000	53	0.00053
chr1_3	900000	1000000	177	0.00177
chr1_3	1000000	1100000	141	0.00141
chr1_3	1100000	1200000	42	0.00042
chr1_3	1200000	1300000	301	0.00301
chr1_3	1300000	1400000	181	0.00181
chr1_3	1400000	1500000	116	0.00116
chr1_3	1500000	1600000	1	1e-05
chr1_3	1600000	1700000	2	2e-05
chr1_3	1700000	1800000	0	0
chr1_3	1800000	1900000	7	7e-05
chr1_3	1900000	2000000	13	0.00013
chr1_3	2000000	2100000	183	0.00183
chr1_3	2100000	2200000	260	0.0026
chr1_3	2200000	2300000	363	0.00363
chr1_3	2300000	2400000	551	0.00551
chr1_3	2400000	2500000	592	0.00592
chr1_3	2500000	2600000	591	0.00591
chr1_3	2600000	2700000	417	0.00417
chr1_3	2700000	2800000	435	0.00435
chr1_3	2800000	2900000	426	0.00426
chr1_3	2900000	3000000	347	0.00347
chr1_3	3000000	3100000	415	0.00415
chr1_3	3100000	3200000	236	0.00236
chr1_3	3200000	3300000	203	0.00203
chr1_3	3300000	3400000	485	0.00485
chr1_3	3400000	3500000	536	0.00536
chr1_3	3500000	3600000	607	0.00607
chr1_3	3600000	3700000	339	0.00339
chr1_3	3700000	3800000	366	0.00366
chr1_3	3800000	3900000	148	0.00148
chr1_3	3900000	4000000	358	0.00358
chr1_3	4000000	4100000	454	0.00454
chr1_3	4100000	4200000	409	0.00409
chr1_3	4200000	4300000	433	0.00433
chr1_3	4300000	4400000	436	0.00436
chr1_3	4400000	4500000	299	0.00299
chr1_3	4500000	4600000	331	0.00331
chr1_3	4600000	4700000	423	0.00423
chr1_3	4700000	4800000	400	0.004
chr1_3	4800000	4900000	320	0.0032
chr1_3	4900000	5000000	309	0.00309
chr1_3	5000000	5100000	252	0.00252
chr1_3	5100000	5200000	303	0.00303
chr1_3	5200000	5300000	330	0.0033
chr1_3	5300000	5400000	200	0.002
chr1_3	5400000	5500000	176	0.00176
chr1_3	5500000	5600000	236	0.00236
chr1_3	5600000	5700000	395	0.00395
chr1_3	5700000	5800000	586	0.00586
chr1_3	5800000	5900000	248	0.00248
chr1_3	5900000	6000000	3	3e-05
chr1_3	6000000	6100000	176	0.00176
[truncated: 28,405 more rows]
