# Supplementary material for: Resequencing Elucidates the Genetic Mechanism Underlying Elite Early-Maturing Potato Parent Kexin23
Source: Research Square preprint supplement (doi:10.21203/rs.3.rs-7582259/v1), 2025-12-02
Supplement: Supplementary file 29 [file Table S8. Distribution frequency of non-variable segment across genomic regions.xls]

## Sheet: Sheet1
Chr.	Position-start	Position-end	Size(kb)
chr1_1	10200000	10800000	600
chr1_1	10900000	11300000	400
chr1_1	37900000	38300000	400
chr1_1	70800000	71100000	300
chr1_1	81600000	81900000	300
chr1_1	82200000	82500000	300
chr1_1	84100000	84400000	300
chr1_1	6700000	6900000	200
chr1_1	70500000	70700000	200
chr1_1	84900000	85100000	200
chr1_1	7000000	7100000	100
chr1_1	7200000	7300000	100
chr1_1	9600000	9700000	100
chr1_1	9900000	10000000	100
chr1_1	11400000	11500000	100
chr1_1	12100000	12200000	100
chr1_1	13400000	13500000	100
chr1_1	35600000	35700000	100
chr1_1	36100000	36200000	100
chr1_1	36600000	36700000	100
chr1_1	36800000	36900000	100
chr1_1	37100000	37200000	100
chr1_1	37300000	37400000	100
chr1_1	37600000	37700000	100
chr1_1	74400000	74500000	100
chr1_1	77600000	77700000	100
chr1_1	78300000	78400000	100
chr1_1	81400000	81500000	100
chr1_1	82700000	82800000	100
chr1_1	83900000	84000000	100
chr1_1	92700000	92800000	100
chr1_1	96800000	96900000	100
chr1_2	88100000	90400000	2300
chr1_2	85300000	86000000	700
chr1_2	69400000	69900000	500
chr1_2	11800000	12200000	400
chr1_2	72600000	72900000	300
chr1_2	31600000	31800000	200
chr1_2	70200000	70400000	200
chr1_2	87800000	88000000	200
chr1_2	91200000	91400000	200
chr1_2	2300000	2400000	100
chr1_2	12400000	12500000	100
chr1_2	12600000	12700000	100
chr1_2	31400000	31500000	100
chr1_2	68700000	68800000	100
chr1_2	75100000	75200000	100
chr1_2	90500000	90600000	100
chr1_2	92300000	92400000	100
chr1_3	8700000	11100000	2400
chr1_3	72000000	73900000	1900
chr1_3	61100000	62000000	900
chr1_3	52300000	52800000	500
chr1_3	68100000	68600000	500
chr1_3	71400000	71900000	500
chr1_3	66500000	66800000	300
chr1_3	69000000	69300000	300
chr1_3	8300000	8500000	200
chr1_3	11200000	11400000	200
chr1_3	52000000	52200000	200
chr1_3	69600000	69800000	200
chr1_3	1700000	1800000	100
chr1_3	27500000	27600000	100
chr1_3	62400000	62500000	100
chr1_3	67300000	67400000	100
chr1_3	67600000	67700000	100
chr1_3	68800000	68900000	100
chr1_3	74900000	75000000	100
chr1_3	75300000	75400000	100
chr1_4	69100000	70200000	1100
chr1_4	79600000	80600000	1000
chr1_4	10400000	11300000	900
chr1_4	59500000	60300000	800
chr1_4	88500000	89300000	800
chr1_4	4700000	5400000	700
chr1_4	89900000	90500000	600
chr1_4	73600000	74000000	400
chr1_4	78800000	79200000	400
chr1_4	81000000	81400000	400
chr1_4	65100000	65400000	300
chr1_4	77400000	77700000	300
chr1_4	81500000	81800000	300
chr1_4	88100000	88400000	300
chr1_4	65500000	65700000	200
chr1_4	72900000	73100000	200
chr1_4	74500000	74700000	200
chr1_4	79300000	79500000	200
chr1_4	80700000	80900000	200
chr1_4	85700000	85900000	200
chr1_4	89400000	89600000	200
chr1_4	31000000	31100000	100
chr1_4	31300000	31400000	100
chr1_4	38200000	38300000	100
chr1_4	38600000	38700000	100
chr1_4	63800000	63900000	100
chr1_4	74200000	74300000	100
chr1_4	77800000	77900000	100
chr1_4	83200000	83300000	100
chr1_4	83600000	83700000	100
chr1_4	86100000	86200000	100
chr1_4	86300000	86400000	100
chr1_4	87500000	87600000	100
chr1_4	90600000	90700000	100
chr1_4	90800000	90900000	100
chr1_4	91400000	91500000	100
chr1_4	92400000	92500000	100
chr10_1	52200000	54400000	2200
chr10_1	47800000	49800000	2000
chr10_1	7000000	7700000	700
chr10_1	47000000	47600000	600
chr10_1	60600000	61100000	500
chr10_1	50200000	50600000	400
chr10_1	50700000	51100000	400
chr10_1	62800000	63200000	400
chr10_1	61200000	61500000	300
chr10_1	62400000	62700000	300
chr10_1	64000000	64200000	200
chr10_1	1000000	1100000	100
chr10_1	7800000	7900000	100
chr10_1	8000000	8100000	100
chr10_1	8200000	8300000	100
chr10_1	36300000	36400000	100
chr10_1	36500000	36600000	100
chr10_1	39700000	39800000	100
chr10_1	49900000	50000000	100
chr10_1	51800000	51900000	100
chr10_1	52000000	52100000	100
chr10_1	63400000	63500000	100
chr10_1	63800000	63900000	100
chr10_2	25200000	34300000	9100
chr10_2	15300000	20300000	5000
chr10_2	36900000	40800000	3900
chr10_2	12700000	15200000	2500
chr10_2	22100000	24400000	2300
chr10_2	42300000	43900000	1600
chr10_2	6400000	7900000	1500
chr10_2	10500000	11900000	1400
chr10_2	40900000	42200000	1300
chr10_2	20400000	21400000	1000
chr10_2	35700000	36700000	1000
chr10_2	1300000	2200000	900
chr10_2	34700000	35600000	900
chr10_2	4900000	5700000	800
chr10_2	100000	800000	700
chr10_2	8000000	8700000	700
chr10_2	9500000	10100000	600
chr10_2	12000000	12600000	600
chr10_2	53500000	54100000	600
chr10_2	5800000	6300000	500
chr10_2	24500000	24900000	400
chr10_2	4100000	4400000	300
chr10_2	21500000	21800000	300
chr10_2	2300000	2500000	200
chr10_2	8800000	9000000	200
chr10_2	34400000	34600000	200
chr10_2	44500000	44700000	200
chr10_2	49000000	49200000	200
chr10_2	900000	1000000	100
chr10_2	2600000	2700000	100
chr10_2	4600000	4700000	100
chr10_2	9100000	9200000	100
chr10_2	10300000	10400000	100
chr10_2	21900000	22000000	100
chr10_2	25000000	25100000	100
chr10_2	44000000	44100000	100
chr10_2	48000000	48100000	100
chr10_2	54500000	54600000	100
chr10_2	54700000	54800000	100
chr10_2	56400000	56500000	100
chr10_2	56900000	57000000	100
chr10_2	60000000	60100000	100
chr10_3	24300000	39200000	14900
chr10_3	39300000	46300000	7000
chr10_3	10100000	16500000	6400
chr10_3	16700000	21600000	4900
chr10_3	5900000	10000000	4100
chr10_3	21700000	23000000	1300
chr10_3	23100000	24200000	1100
chr10_3	3800000	4300000	500
chr10_3	59000000	59400000	400
chr10_3	57300000	57600000	300
chr10_3	700000	900000	200
chr10_3	57700000	57900000	200
chr10_3	61000000	61110323	110.323
chr10_3	2000000	2100000	100
chr10_3	2500000	2600000	100
chr10_3	4500000	4600000	100
chr10_3	52600000	52700000	100
chr10_3	58000000	58100000	100
chr10_3	58300000	58400000	100
chr10_3	58800000	58900000	100
chr10_3	59500000	59600000	100
chr10_3	59900000	60000000	100
chr10_4	30700000	37900000	7200
chr10_4	8500000	14600000	6100
chr10_4	14900000	20200000	5300
chr10_4	38000000	42600000	4600
chr10_4	21700000	25400000	3700
chr10_4	45600000	48200000	2600
chr10_4	50200000	51900000	1700
chr10_4	25500000	27000000	1500
chr10_4	27100000	28500000	1400
chr10_4	42700000	44100000	1400
chr10_4	20300000	21600000	1300
chr10_4	29300000	30600000	1300
chr10_4	0	1200000	1200
chr10_4	7400000	8400000	1000
chr10_4	6300000	7000000	700
chr10_4	2100000	2700000	600
chr10_4	4400000	5000000	600
chr10_4	5200000	5800000	600
chr10_4	28600000	29200000	600
chr10_4	49400000	50000000	600
chr10_4	44200000	44700000	500
chr10_4	1500000	1900000	400
chr10_4	5900000	6200000	300
chr10_4	59100000	59400000	300
chr10_4	7100000	7300000	200
chr10_4	48400000	48600000	200
chr10_4	1300000	1400000	100
chr10_4	14700000	14800000	100
chr10_4	49000000	49100000	100
chr10_4	49200000	49300000	100
chr10_4	56400000	56500000	100
chr10_4	58200000	58300000	100
chr10_4	58900000	59000000	100
chr10_4	60400000	60500000	100
chr11_1	17500000	21500000	4000
chr11_1	8600000	10400000	1800
chr11_1	26100000	27600000	1500
chr11_1	24200000	25500000	1300
chr11_1	16300000	17400000	1100
chr11_1	10700000	11700000	1000
chr11_1	28700000	29700000	1000
chr11_1	27700000	28600000	900
chr11_1	29800000	30700000	900
chr11_1	21800000	22600000	800
chr11_1	7700000	8400000	700
chr11_1	33500000	34200000	700
chr11_1	22700000	23300000	600
chr11_1	23500000	24000000	500
chr11_1	25600000	26000000	400
chr11_1	32000000	32400000	400
chr11_1	35100000	35500000	400
chr11_1	7300000	7600000	300
chr11_1	31300000	31600000	300
chr11_1	32800000	33000000	200
chr11_1	33100000	33300000	200
chr11_1	39500000	39700000	200
chr11_1	10500000	10600000	100
chr11_1	21600000	21700000	100
chr11_1	30800000	30900000	100
chr11_1	31700000	31800000	100
chr11_1	32600000	32700000	100
chr11_1	34600000	34700000	100
chr11_1	34800000	34900000	100
chr11_1	40100000	40200000	100
chr11_2	36100000	38000000	1900
chr11_2	8500000	10100000	1600
chr11_2	33900000	34600000	700
chr11_2	7800000	8400000	600
chr11_2	38700000	39200000	500
chr11_2	39500000	40000000	500
chr11_2	40100000	40600000	500
chr11_2	42100000	42600000	500
chr11_2	38100000	38400000	300
chr11_2	10200000	10400000	200
chr11_2	14000000	14200000	200
chr11_2	17400000	17600000	200
chr11_2	34700000	34900000	200
chr11_2	35500000	35700000	200
chr11_2	35800000	36000000	200
chr11_2	11500000	11600000	100
chr11_2	13500000	13600000	100
chr11_2	13700000	13800000	100
chr11_2	19600000	19700000	100
chr11_2	24000000	24100000	100
chr11_2	24400000	24500000	100
chr11_2	29200000	29300000	100
chr11_2	31200000	31300000	100
chr11_2	35000000	35100000	100
chr11_2	35300000	35400000	100
chr11_2	38500000	38600000	100
chr11_2	39300000	39400000	100
chr11_2	41100000	41200000	100
chr11_3	6400000	7700000	1300
chr11_3	7800000	9000000	1200
chr11_3	5700000	6300000	600
chr11_3	5100000	5600000	500
chr11_3	9100000	9500000	400
chr11_3	18100000	18500000	400
chr11_3	15400000	15600000	200
chr11_3	40200000	40400000	200
chr11_3	41600000	41800000	200
chr11_3	11100000	11200000	100
chr11_3	11300000	11400000	100
chr11_3	15200000	15300000	100
chr11_3	16700000	16800000	100
chr11_3	21700000	21800000	100
chr11_3	22200000	22300000	100
chr11_3	23600000	23700000	100
chr11_3	27000000	27100000	100
chr11_3	41300000	41400000	100
chr11_3	42200000	42300000	100
chr11_4	22800000	29300000	6500
chr11_4	15500000	20100000	4600
chr11_4	34100000	36100000	2000
chr11_4	6700000	8400000	1700
chr11_4	29400000	30200000	800
chr11_4	31200000	32000000	800
chr11_4	21300000	22000000	700
chr11_4	20200000	20800000	600
chr11_4	22100000	22700000	600
chr11_4	30300000	30900000	600
chr11_4	32700000	33300000	600
chr11_4	33400000	34000000	600
chr11_4	32200000	32600000	400
chr11_4	6300000	6600000	300
chr11_4	14900000	15200000	300
chr11_4	20900000	21200000	300
chr11_4	36400000	36700000	300
chr11_4	5700000	5900000	200
chr11_4	6000000	6200000	200
chr11_4	12300000	12500000	200
chr11_4	37100000	37300000	200
chr11_4	9800000	9900000	100
chr11_4	12000000	12100000	100
chr11_4	31000000	31100000	100
chr11_4	31900000	32000000	100
chr11_4	37800000	37900000	100
chr12_1	44000000	45800000	1800
chr12_1	8600000	9600000	1000
chr12_1	57800000	58800000	1000
chr12_1	59400000	60400000	1000
chr12_1	9700000	10600000	900
chr12_1	54200000	55100000	900
chr12_1	6800000	7500000	700
chr12_1	61100000	61600000	500
chr12_1	8000000	8400000	400
chr12_1	56700000	57100000	400
chr12_1	62000000	62400000	400
chr12_1	1800000	2100000	300
chr12_1	11200000	11500000	300
chr12_1	64000000	64300000	300
chr12_1	7600000	7800000	200
chr12_1	55300000	55500000	200
chr12_1	56300000	56500000	200
chr12_1	57500000	57700000	200
chr12_1	60800000	61000000	200
chr12_1	100000	200000	100
chr12_1	2900000	3000000	100
chr12_1	10800000	10900000	100
chr12_1	11000000	11100000	100
chr12_1	55800000	55900000	100
chr12_1	60600000	60700000	100
chr12_1	61800000	61900000	100
chr12_1	65500000	65600000	100
chr12_2	19500000	32200000	12700
chr12_2	32800000	38600000	5800
chr12_2	40500000	46300000	5800
chr12_2	32900000	38600000	5700
chr12_2	14200000	19400000	5200
chr12_2	46400000	50800000	4400
chr12_2	1800000	4200000	2400
chr12_2	100000	1100000	1000
chr12_2	51100000	52100000	1000
chr12_2	52200000	53200000	1000
chr12_2	38700000	39600000	900
chr12_2	39700000	40400000	700
chr12_2	61000000	61700000	700
chr12_2	9900000	10500000	600
chr12_2	9300000	9800000	500
chr12_2	4700000	5100000	400
chr12_2	5800000	6200000	400
chr12_2	32300000	32700000	400
chr12_2	6300000	6600000	300
chr12_2	5500000	5700000	200
chr12_2	58400000	58600000	200
chr12_2	11200000	11300000	100
chr12_2	11900000	12000000	100
chr12_2	13100000	13200000	100
chr12_2	50900000	51000000	100
chr12_2	54100000	54200000	100
chr12_2	54600000	54700000	100
chr12_2	55000000	55100000	100
chr12_2	55300000	55400000	100
chr12_2	55600000	55700000	100
chr12_2	56300000	56400000	100
chr12_2	56500000	56600000	100
chr12_2	58200000	58300000	100
chr12_2	65300000	65400000	100
chr12_3	48000000	49200000	1200
chr12_3	0	1100000	1100
chr12_3	7000000	7700000	700
chr12_3	46400000	47100000	700
chr12_3	47200000	47900000	700
chr12_3	29500000	29900000	400
chr12_3	6600000	6900000	300
chr12_3	28900000	29200000	300
chr12_3	45800000	46100000	300
chr12_3	2100000	2300000	200
chr12_3	3200000	3400000	200
chr12_3	2800000	2900000	100
chr12_3	18500000	18600000	100
chr12_3	30000000	30100000	100
chr12_3	30200000	30300000	100
chr12_3	30400000	30500000	100
chr12_3	31100000	31200000	100
chr12_3	45100000	45200000	100
chr12_3	46200000	46300000	100
chr12_3	64100000	64200000	100
chr12_3	68300000	68400000	100
chr12_4	31200000	43600000	12400
chr12_4	49000000	55200000	6200
chr12_4	23800000	28800000	5000
chr12_4	57600000	60800000	3200
chr12_4	15500000	18300000	2800
chr12_4	44600000	46900000	2300
chr12_4	21900000	23700000	1800
chr12_4	3000000	4600000	1600
chr12_4	28900000	30300000	1400
chr12_4	9300000	10300000	1000
chr12_4	18400000	19400000	1000
chr12_4	47900000	48900000	1000
chr12_4	47000000	47800000	800
chr12_4	62800000	63600000	800
chr12_4	19800000	20500000	700
chr12_4	30400000	31100000	700
chr12_4	56800000	57500000	700
chr12_4	60900000	61600000	700
chr12_4	11400000	12000000	600
chr12_4	55300000	55900000	600
chr12_4	61700000	62300000	600
chr12_4	8500000	9000000	500
chr12_4	20700000	21200000	500
chr12_4	56200000	56700000	500
chr12_4	12100000	12500000	400
chr12_4	4700000	5000000	300
chr12_4	6700000	7000000	300
chr12_4	8100000	8400000	300
chr12_4	12700000	13000000	300
chr12_4	62400000	62700000	300
chr12_4	1200000	1400000	200
chr12_4	6100000	6300000	200
chr12_4	7100000	7300000	200
chr12_4	15200000	15400000	200
chr12_4	66100000	66300000	200
chr12_4	5100000	5200000	100
chr12_4	5800000	5900000	100
chr12_4	7500000	7600000	100
chr12_4	7700000	7800000	100
chr12_4	9100000	9200000	100
chr12_4	66400000	66500000	100
chr12_4	67600000	67700000	100
chr12_4	67900000	68000000	100
chr2_1	27700000	28700000	1000
chr2_1	44000000	44500000	500
chr2_1	28900000	29300000	400
chr2_1	29400000	29800000	400
chr2_1	45900000	46200000	300
chr2_1	32700000	32900000	200
chr2_1	33200000	33400000	200
chr2_1	45600000	45800000	200
chr2_1	9600000	9700000	100
chr2_1	27300000	27400000	100
chr2_1	27500000	27600000	100
chr2_1	33000000	33100000	100
chr2_1	41500000	41600000	100
chr2_1	42200000	42300000	100
chr2_1	43500000	43600000	100
chr2_1	43700000	43800000	100
chr2_1	46300000	46400000	100
chr2_1	46600000	46700000	100
chr2_1	47300000	47400000	100
chr2_2	19600000	20900000	1300
chr2_2	45200000	46000000	800
chr2_2	36500000	37100000	600
chr2_2	39800000	40400000	600
chr2_2	44100000	44700000	600
chr2_2	31500000	32000000	500
chr2_2	34000000	34500000	500
chr2_2	32800000	33200000	400
chr2_2	33400000	33700000	300
chr2_2	32300000	32500000	200
chr2_2	40500000	40700000	200
chr2_2	44900000	45100000	200
chr2_2	47100000	47300000	200
chr2_2	21000000	21100000	100
chr2_2	26000000	26100000	100
chr2_2	26300000	26400000	100
chr2_2	32600000	32700000	100
chr2_2	33800000	33900000	100
chr2_2	35900000	36000000	100
chr2_2	38700000	38800000	100
chr2_2	40800000	40900000	100
chr2_2	41000000	41100000	100
chr2_3	0	2200000	2200
chr2_3	7100000	8900000	1800
chr2_3	4400000	6100000	1700
chr2_3	11600000	13200000	1600
chr2_3	10600000	11500000	900
chr2_3	6200000	7000000	800
chr2_3	35900000	36700000	800
chr2_3	2300000	3000000	700
chr2_3	13300000	14000000	700
chr2_3	30900000	31500000	600
chr2_3	3500000	4000000	500
chr2_3	33000000	33500000	500
chr2_3	41200000	41700000	500
chr2_3	44700000	45200000	500
chr2_3	31600000	32000000	400
chr2_3	32200000	32600000	400
chr2_3	43600000	44000000	400
chr2_3	3100000	3400000	300
chr2_3	9000000	9300000	300
chr2_3	9700000	10000000	300
chr2_3	14100000	14400000	300
chr2_3	14700000	15000000	300
chr2_3	10100000	10300000	200
chr2_3	25400000	25600000	200
chr2_3	42000000	42200000	200
chr2_3	44100000	44300000	200
chr2_3	44400000	44600000	200
chr2_3	4100000	4200000	100
chr2_3	9500000	9600000	100
chr2_3	10400000	10500000	100
chr2_3	14500000	14600000	100
chr2_3	15100000	15200000	100
chr2_3	25800000	25900000	100
chr2_3	28600000	28700000	100
chr2_3	32800000	32900000	100
chr2_3	33600000	33700000	100
chr2_3	35200000	35300000	100
chr2_3	37100000	37200000	100
chr2_3	42500000	42600000	100
chr2_3	43200000	43300000	100
chr2_3	43400000	43500000	100
chr2_4	400000	3000000	2600
chr2_4	5900000	7700000	1800
chr2_4	24300000	25900000	1600
chr2_4	4300000	5800000	1500
chr2_4	20400000	21900000	1500
chr2_4	9200000	10300000	1100
chr2_4	13300000	14300000	1000
chr2_4	11900000	12800000	900
chr2_4	10700000	11500000	800
chr2_4	26000000	26600000	600
chr2_4	8400000	8900000	500
chr2_4	29500000	30000000	500
chr2_4	3200000	3500000	300
chr2_4	3900000	4200000	300
chr2_4	14900000	15200000	300
chr2_4	0	200000	200
chr2_4	10400000	10600000	200
chr2_4	11600000	11800000	200
chr2_4	13000000	13200000	200
chr2_4	3600000	3700000	100
chr2_4	7800000	7900000	100
chr2_4	8100000	8200000	100
chr2_4	9000000	9100000	100
chr2_4	14400000	14500000	100
chr2_4	14600000	14700000	100
chr2_4	24100000	24200000	100
chr2_4	30100000	30200000	100
chr3_1	62000000	65000000	3000
chr3_1	27600000	30000000	2400
chr3_1	11500000	13100000	1600
chr3_1	30100000	31600000	1500
chr3_1	14200000	15500000	1300
chr3_1	24200000	25500000	1300
chr3_1	8100000	9300000	1200
chr3_1	26200000	27400000	1200
chr3_1	66600000	67562088	962.088
chr3_1	4400000	5300000	900
chr3_1	36100000	37000000	900
chr3_1	40200000	41100000	900
chr3_1	35200000	36000000	800
chr3_1	7300000	8000000	700
chr3_1	32800000	33500000	700
chr3_1	33800000	34500000	700
chr3_1	46400000	47100000	700
chr3_1	65800000	66500000	700
chr3_1	3700000	4300000	600
chr3_1	5500000	6100000	600
chr3_1	6600000	7200000	600
chr3_1	41500000	42100000	600
chr3_1	34600000	35100000	500
chr3_1	37100000	37600000	500
chr3_1	31700000	32100000	400
chr3_1	37900000	38300000	400
chr3_1	47500000	47900000	400
chr3_1	6200000	6500000	300
chr3_1	9400000	9700000	300
chr3_1	17300000	17600000	300
chr3_1	20200000	20500000	300
chr3_1	22900000	23200000	300
chr3_1	25600000	25900000	300
chr3_1	32400000	32700000	300
chr3_1	39400000	39700000	300
chr3_1	48000000	48300000	300
chr3_1	48400000	48700000	300
chr3_1	100000	300000	200
chr3_1	13400000	13600000	200
chr3_1	13800000	14000000	200
chr3_1	16400000	16600000	200
chr3_1	17000000	17200000	200
chr3_1	17900000	18100000	200
chr3_1	18500000	18700000	200
chr3_1	19000000	19200000	200
chr3_1	19600000	19800000	200
chr3_1	23300000	23500000	200
chr3_1	38400000	38600000	200
chr3_1	38900000	39100000	200
chr3_1	41200000	41400000	200
chr3_1	48900000	49100000	200
chr3_1	65300000	65500000	200
chr3_1	3400000	3500000	100
chr3_1	10000000	10100000	100
chr3_1	15700000	15800000	100
chr3_1	18200000	18300000	100
chr3_1	19300000	19400000	100
chr3_1	21000000	21100000	100
chr3_1	21800000	21900000	100
chr3_1	22300000	22400000	100
chr3_1	22500000	22600000	100
chr3_1	22700000	22800000	100
chr3_1	23600000	23700000	100
chr3_1	26000000	26100000	100
chr3_1	32200000	32300000	100
chr3_1	33600000	33700000	100
chr3_1	39200000	39300000	100
chr3_1	39800000	39900000	100
chr3_1	40000000	40100000	100
chr3_1	42300000	42400000	100
chr3_1	44000000	44100000	100
chr3_1	61700000	61800000	100
chr3_1	65100000	65200000	100
chr3_1	65600000	65700000	100
chr3_2	13000000	13600000	600
chr3_2	19000000	19600000	600
chr3_2	14700000	15100000	400
chr3_2	15200000	15600000	400
chr3_2	16400000	16800000	400
chr3_2	18100000	18500000	400
chr3_2	20900000	21300000	400
chr3_2	24900000	25300000	400
chr3_2	11300000	11600000	300
chr3_2	11800000	12100000	300
chr3_2	13700000	14000000	300
chr3_2	20200000	20500000	300
chr3_2	50200000	50500000	300
chr3_2	400000	600000	200
chr3_2	14400000	14600000	200
chr3_2	15700000	15900000	200
chr3_2	16100000	16300000	200
chr3_2	16900000	17100000	200
chr3_2	17800000	18000000	200
chr3_2	22300000	22500000	200
chr3_2	23200000	23400000	200
chr3_2	23500000	23700000	200
chr3_2	23800000	24000000	200
chr3_2	24300000	24500000	200
chr3_2	27600000	27800000	200
chr3_2	29700000	29900000	200
chr3_2	32300000	32500000	200
chr3_2	33400000	33600000	200
chr3_2	35700000	35900000	200
chr3_2	42000000	42200000	200
chr3_2	45800000	46000000	200
chr3_2	55200000	55400000	200
chr3_2	0	100000	100
chr3_2	10300000	10400000	100
chr3_2	10500000	10600000	100
chr3_2	10900000	11000000	100
chr3_2	11100000	11200000	100
chr3_2	12400000	12500000	100
chr3_2	14100000	14200000	100
chr3_2	17500000	17600000	100
chr3_2	19800000	19900000	100
chr3_2	20000000	20100000	100
chr3_2	20700000	20800000	100
chr3_2	21400000	21500000	100
chr3_2	21600000	21700000	100
chr3_2	21800000	21900000	100
chr3_2	22100000	22200000	100
chr3_2	22800000	22900000	100
chr3_2	23000000	23100000	100
chr3_2	24600000	24700000	100
chr3_2	27900000	28000000	100
chr3_2	28800000	28900000	100
chr3_2	30600000	30700000	100
chr3_2	32600000	32700000	100
chr3_2	33100000	33200000	100
chr3_2	33900000	34000000	100
chr3_2	34100000	34200000	100
chr3_2	34400000	34500000	100
chr3_2	35000000	35100000	100
chr3_2	36300000	36400000	100
chr3_2	36500000	36600000	100
chr3_2	42400000	42500000	100
chr3_2	52900000	53000000	100
chr3_2	53400000	53500000	100
chr3_2	62300000	62400000	100
chr3_3	27000000	38000000	11000
chr3_3	5300000	10500000	5200
chr3_3	13500000	16200000	2700
chr3_3	62400000	65100000	2700
chr3_3	24300000	26900000	2600
chr3_3	65200000	67219074	2019.07
chr3_3	39100000	41000000	1900
chr3_3	3900000	5200000	1300
chr3_3	20400000	21600000	1200
chr3_3	19200000	20300000	1100
chr3_3	12400000	13400000	1000
chr3_3	38100000	39000000	900
chr3_3	3000000	3800000	800
chr3_3	23400000	24200000	800
chr3_3	46300000	47100000	800
chr3_3	48100000	48900000	800
chr3_3	41100000	41800000	700
chr3_3	61600000	62300000	700
chr3_3	17500000	18100000	600
chr3_3	18500000	19100000	600
chr3_3	11900000	12300000	400
chr3_3	16500000	16900000	400
chr3_3	17000000	17400000	400
chr3_3	22900000	23300000	400
chr3_3	41900000	42300000	400
chr3_3	10800000	11100000	300
chr3_3	11500000	11800000	300
chr3_3	22200000	22500000	300
chr3_3	59800000	60100000	300
chr3_3	11200000	11400000	200
chr3_3	21700000	21900000	200
chr3_3	22600000	22800000	200
chr3_3	49400000	49600000	200
chr3_3	58400000	58600000	200
chr3_3	18300000	18400000	100
chr3_3	49100000	49200000	100
chr3_3	58800000	58900000	100
chr3_3	59000000	59100000	100
chr3_4	20700000	22400000	1700
chr3_4	15100000	16200000	1100
chr3_4	12900000	13900000	1000
chr3_4	14000000	15000000	1000
chr3_4	19600000	20600000	1000
chr3_4	9800000	10700000	900
chr3_4	59900000	60700000	800
chr3_4	1900000	2600000	700
chr3_4	11100000	11800000	700
chr3_4	17200000	17900000	700
chr3_4	2700000	3300000	600
chr3_4	12100000	12500000	400
chr3_4	25000000	25400000	400
chr3_4	18800000	19100000	300
chr3_4	22900000	23200000	300
chr3_4	23700000	24000000	300
chr3_4	25800000	26100000	300
chr3_4	45700000	46000000	300
chr3_4	56900000	57200000	300
chr3_4	9100000	9300000	200
chr3_4	16900000	17100000	200
chr3_4	27300000	27500000	200
chr3_4	30400000	30600000	200
chr3_4	39600000	39800000	200
chr3_4	39900000	40100000	200
chr3_4	44300000	44500000	200
chr3_4	46100000	46300000	200
chr3_4	55800000	56000000	200
chr3_4	58200000	58400000	200
chr3_4	100000	200000	100
chr3_4	4600000	4700000	100
chr3_4	9600000	9700000	100
chr3_4	10900000	11000000	100
chr3_4	12700000	12800000	100
chr3_4	16300000	16400000	100
chr3_4	16700000	16800000	100
chr3_4	18200000	18300000	100
chr3_4	18400000	18500000	100
chr3_4	19200000	19300000	100
chr3_4	19400000	19500000	100
chr3_4	22600000	22700000	100
chr3_4	23400000	23500000	100
chr3_4	24700000	24800000	100
chr3_4	26400000	26500000	100
chr3_4	28300000	28400000	100
chr3_4	30100000	30200000	100
chr3_4	31000000	31100000	100
chr3_4	31200000	31300000	100
chr3_4	31800000	31900000	100
chr3_4	32000000	32100000	100
chr3_4	32200000	32300000	100
chr3_4	32800000	32900000	100
chr3_4	33600000	33700000	100
chr3_4	34100000	34200000	100
chr3_4	34300000	34400000	100
chr3_4	44700000	44800000	100
chr3_4	48700000	48800000	100
chr3_4	48900000	49000000	100
chr3_4	52700000	52800000	100
chr3_4	55400000	55500000	100
chr3_4	55600000	55700000	100
chr3_4	56100000	56200000	100
chr3_4	62400000	62500000	100
chr4_1	58900000	60400000	1500
chr4_1	60500000	61600000	1100
chr4_1	56100000	56700000	600
chr4_1	56800000	57400000	600
chr4_1	58300000	58700000	400
chr4_1	55300000	55600000	300
chr4_1	55800000	56000000	200
chr4_1	61700000	61900000	200
chr4_1	55000000	55100000	100
chr4_1	57600000	57700000	100
chr4_1	57900000	58000000	100
chr4_1	58100000	58200000	100
chr4_2	65800000	68700000	2900
chr4_2	68800000	69900000	1100
chr4_2	63800000	64200000	400
chr4_2	64300000	64700000	400
chr4_2	65400000	65700000	300
chr4_2	64900000	65100000	200
chr4_2	12400000	12500000	100
chr4_2	65200000	65300000	100
chr4_2	72700000	72800000	100
chr4_3	20500000	20900000	400
chr4_3	19400000	19700000	300
chr4_3	61000000	61300000	300
chr4_3	21300000	21500000	200
chr4_3	9200000	9300000	100
chr4_3	21000000	21100000	100
chr4_3	21600000	21700000	100
chr4_3	50500000	50600000	100
chr4_3	54500000	54600000	100
chr4_3	59800000	59900000	100
chr4_3	60800000	60900000	100
chr4_3	64700000	64800000	100
chr4_4	22900000	23500000	600
chr4_4	54900000	55500000	600
chr4_4	57600000	58200000	600
chr4_4	55900000	56300000	400
chr4_4	23600000	23900000	300
chr4_4	57200000	57500000	300
chr4_4	15000000	15200000	200
chr4_4	62600000	62800000	200
chr4_4	66600000	66800000	200
chr4_4	52200000	52300000	100
chr4_4	66100000	66200000	100
chr4_4	66900000	67000000	100
chr5_1	2900000	4300000	1400
chr5_1	51800000	52700000	900
chr5_1	1100000	1800000	700
chr5_1	2300000	2800000	500
chr5_1	50400000	50800000	400
chr5_1	300000	500000	200
chr5_1	50900000	51100000	200
chr5_1	51200000	51400000	200
chr5_1	53100000	53300000	200
chr5_1	100000	200000	100
chr5_1	900000	1000000	100
chr5_1	2000000	2100000	100
chr5_1	30200000	30300000	100
chr5_1	51600000	51700000	100
chr5_1	52800000	52900000	100
chr5_1	53800000	53900000	100
chr5_2	4500000	6700000	2200
chr5_2	700000	1400000	700
chr5_2	1500000	2200000	700
chr5_2	3400000	4000000	600
chr5_2	12800000	13400000	600
chr5_2	2300000	2800000	500
chr5_2	14000000	14500000	500
chr5_2	200000	500000	300
chr5_2	10400000	10700000	300
chr5_2	10800000	11100000	300
chr5_2	11300000	11600000	300
chr5_2	12200000	12500000	300
chr5_2	14700000	15000000	300
chr5_2	3100000	3300000	200
chr5_2	11800000	12000000	200
chr5_2	13500000	13700000	200
chr5_2	47600000	47800000	200
chr5_2	50200000	50400000	200
chr5_2	0	100000	100
chr5_2	6800000	6900000	100
chr5_2	10200000	10300000	100
chr5_2	48500000	48600000	100
chr5_2	49100000	49200000	100
chr5_2	50500000	50600000	100
chr5_2	51200000	51300000	100
chr5_3	17300000	21300000	4000
chr5_3	45400000	49300000	3900
chr5_3	42000000	45300000	3300
chr5_3	22100000	24900000	2800
chr5_3	30800000	33500000	2700
chr5_3	7900000	9500000	1600
chr5_3	39600000	41100000	1500
chr5_3	15800000	17200000	1400
chr5_3	10500000	11800000	1300
chr5_3	14500000	15700000	1200
chr5_3	6700000	7800000	1100
chr5_3	11900000	13000000	1100
chr5_3	26800000	27900000	1100
chr5_3	28800000	29900000	1100
chr5_3	3800000	4800000	1000
chr5_3	13100000	14100000	1000
chr5_3	9600000	10400000	800
chr5_3	26000000	26700000	700
chr5_3	49400000	50100000	700
chr5_3	21400000	22000000	600
chr5_3	34200000	34800000	600
chr5_3	35900000	36500000	600
chr5_3	36800000	37400000	600
chr5_3	38900000	39500000	600
chr5_3	37500000	38000000	500
chr5_3	41200000	41700000	500
chr5_3	1700000	2100000	400
chr5_3	33600000	34000000	400
chr5_3	2200000	2500000	300
chr5_3	25000000	25300000	300
chr5_3	28000000	28300000	300
chr5_3	35500000	35800000	300
chr5_3	38500000	38800000	300
chr5_3	0	200000	200
chr5_3	3500000	3700000	200
chr5_3	14200000	14400000	200
chr5_3	25400000	25600000	200
chr5_3	25700000	25900000	200
chr5_3	34900000	35100000	200
chr5_3	52800000	53000000	200
chr5_3	28400000	28500000	100
chr5_3	28600000	28700000	100
chr5_3	38300000	38400000	100
chr5_3	50500000	50600000	100
chr5_3	51600000	51700000	100
chr5_4	41900000	46300000	4400
chr5_4	11600000	15300000	3700
chr5_4	26100000	28600000	2500
chr5_4	31400000	33900000	2500
chr5_4	16600000	18400000	1800
chr5_4	47000000	48800000	1800
chr5_4	5800000	7500000	1700
chr5_4	9800000	11500000	1700
chr5_4	35300000	37000000	1700
chr5_4	40100000	41800000	1700
chr5_4	38500000	40000000	1500
chr5_4	22300000	23700000	1400
chr5_4	15400000	16500000	1100
chr5_4	21100000	22100000	1000
chr5_4	34300000	35200000	900
chr5_4	24200000	25000000	800
chr5_4	9000000	9700000	700
chr5_4	19100000	19800000	700
chr5_4	30600000	31300000	700
chr5_4	37100000	37800000	700
chr5_4	3300000	3900000	600
chr5_4	5000000	5600000	600
chr5_4	19900000	20500000	600
chr5_4	29900000	30500000	600
chr5_4	0	500000	500
chr5_4	8000000	8500000	500
chr5_4	18500000	19000000	500
chr5_4	25500000	26000000	500
chr5_4	20600000	21000000	400
chr5_4	28700000	29100000	400
chr5_4	29200000	29600000	400
chr5_4	23800000	24100000	300
chr5_4	8700000	8900000	200
chr5_4	34000000	34200000	200
chr5_4	37900000	38100000	200
chr5_4	38200000	38400000	200
chr5_4	46400000	46600000	200
chr5_4	51400000	51600000	200
chr5_4	52400000	52600000	200
chr5_4	4700000	4800000	100
chr5_4	7600000	7700000	100
chr5_4	7800000	7900000	100
chr5_4	25100000	25200000	100
chr5_4	29700000	29800000	100
chr5_4	46800000	46900000	100
chr5_4	51700000	51800000	100
chr5_4	52200000	52300000	100
chr6_1	16800000	18300000	1500
chr6_1	53400000	54000000	600
chr6_1	43900000	44200000	300
chr6_1	45000000	45300000	300
chr6_1	55100000	55400000	300
chr6_1	46600000	46800000	200
chr6_1	52300000	52500000	200
chr6_1	52700000	52900000	200
chr6_1	59800000	60000000	200
chr6_1	43100000	43200000	100
chr6_1	44300000	44400000	100
chr6_1	46000000	46100000	100
chr6_1	47100000	47200000	100
chr6_1	48800000	48900000	100
chr6_1	51000000	51100000	100
chr6_1	51500000	51600000	100
chr6_1	52100000	52200000	100
chr6_1	53200000	53300000	100
chr6_1	54700000	54800000	100
chr6_1	59100000	59200000	100
chr6_1	59300000	59400000	100
chr6_1	60500000	60600000	100
chr6_1	61100000	61200000	100
chr6_2	56300000	57700000	1400
chr6_2	57800000	58900000	1100
chr6_2	51800000	52500000	700
chr6_2	59500000	60200000	700
chr6_2	200000	800000	600
chr6_2	49800000	50400000	600
chr6_2	4900000	5300000	400
chr6_2	5400000	5800000	400
chr6_2	6200000	6600000	400
chr6_2	52600000	53000000	400
chr6_2	4200000	4500000	300
chr6_2	49000000	49300000	300
chr6_2	3900000	4100000	200
chr6_2	4600000	4800000	200
chr6_2	59000000	59200000	200
chr6_2	5900000	6000000	100
chr6_2	6700000	6800000	100
chr6_2	6900000	7000000	100
chr6_2	10900000	11000000	100
chr6_2	39900000	40000000	100
chr6_2	41500000	41600000	100
chr6_2	47100000	47200000	100
chr6_2	50500000	50600000	100
chr6_2	51400000	51500000	100
chr6_2	54900000	55000000	100
chr6_2	59300000	59400000	100
chr6_3	23000000	28600000	5600
chr6_3	15900000	19400000	3500
chr6_3	10100000	13100000	3000
chr6_3	56000000	59000000	3000
chr6_3	0	2100000	2100
chr6_3	28700000	30300000	1600
chr6_3	31200000	32600000	1400
chr6_3	51400000	52700000	1300
chr6_3	5100000	6300000	1200
chr6_3	13200000	14400000	1200
chr6_3	20100000	21000000	900
chr6_3	14500000	15300000	800
chr6_3	40600000	41400000	800
chr6_3	59200000	59906178	706.178
chr6_3	4200000	4900000	700
chr6_3	21300000	22000000	700
chr6_3	32800000	33500000	700
chr6_3	48300000	48900000	600
chr6_3	19500000	20000000	500
chr6_3	44200000	44700000	500
chr6_3	45000000	45500000	500
chr6_3	2200000	2600000	400
chr6_3	15400000	15800000	400
chr6_3	22100000	22500000	400
chr6_3	43700000	44100000	400
chr6_3	3100000	3400000	300
chr6_3	22600000	22900000	300
chr6_3	30500000	30800000	300
chr6_3	41500000	41800000	300
chr6_3	3500000	3700000	200
chr6_3	3800000	4000000	200
chr6_3	36400000	36600000	200
chr6_3	37000000	37200000	200
chr6_3	45600000	45800000	200
chr6_3	21100000	21200000	100
chr6_3	31000000	31100000	100
chr6_3	37300000	37400000	100
chr6_3	38100000	38200000	100
chr6_3	39200000	39300000	100
chr6_3	40100000	40200000	100
chr6_3	44800000	44900000	100
chr6_3	47000000	47100000	100
chr6_3	48100000	48200000	100
chr6_3	51000000	51100000	100
chr6_3	55200000	55300000	100
chr6_4	13000000	16200000	3200
chr6_4	16800000	19500000	2700
chr6_4	23000000	25400000	2400
chr6_4	10800000	12900000	2100
chr6_4	20900000	22900000	2000
chr6_4	27400000	29300000	1900
chr6_4	29400000	31000000	1600
chr6_4	32300000	33500000	1200
chr6_4	44300000	45300000	1000
chr6_4	26400000	27300000	900
chr6_4	40700000	41600000	900
chr6_4	43300000	44200000	900
chr6_4	19600000	20400000	800
chr6_4	25500000	26200000	700
chr6_4	57500000	58200000	700
chr6_4	1800000	2400000	600
chr6_4	2500000	3100000	600
chr6_4	31100000	31600000	500
chr6_4	16300000	16700000	400
chr6_4	33900000	34300000	400
chr6_4	42500000	42900000	400
chr6_4	20500000	20800000	300
chr6_4	31900000	32200000	300
chr6_4	37000000	37300000	300
chr6_4	40000000	40300000	300
chr6_4	41800000	42100000	300
chr6_4	47400000	47700000	300
chr6_4	49900000	50200000	300
chr6_4	54700000	55000000	300
chr6_4	3300000	3500000	200
chr6_4	33600000	33800000	200
chr6_4	53300000	53500000	200
chr6_4	55400000	55600000	200
chr6_4	3700000	3800000	100
chr6_4	31700000	31800000	100
chr6_4	36300000	36400000	100
chr6_4	39600000	39700000	100
chr6_4	40400000	40500000	100
chr6_4	45500000	45600000	100
chr6_4	48500000	48600000	100
chr6_4	53700000	53800000	100
chr6_4	56100000	56200000	100
chr6_4	58400000	58500000	100
chr6_4	58600000	58700000	100
chr6_4	59100000	59200000	100
chr7_1	53500000	53900000	400
chr7_1	800000	1100000	300
chr7_1	3000000	3300000	300
chr7_1	53100000	53400000	300
chr7_1	0	200000	200
chr7_1	44800000	45000000	200
chr7_1	49200000	49400000	200
chr7_1	300000	400000	100
chr7_1	600000	700000	100
chr7_1	2500000	2600000	100
chr7_1	2800000	2900000	100
chr7_1	19800000	19900000	100
chr7_1	26100000	26200000	100
chr7_1	42400000	42500000	100
chr7_1	43500000	43600000	100
chr7_1	46500000	46600000	100
chr7_1	48600000	48700000	100
chr7_1	49000000	49100000	100
chr7_1	49500000	49600000	100
chr7_1	49700000	49800000	100
chr7_2	50900000	51600000	700
chr7_2	52000000	52500000	500
chr7_2	3100000	3500000	400
chr7_2	3600000	3900000	300
chr7_2	50500000	50800000	300
chr7_2	1800000	1900000	100
chr7_2	2000000	2100000	100
chr7_2	2700000	2800000	100
chr7_2	39000000	39100000	100
chr7_2	39500000	39600000	100
chr7_2	41400000	41500000	100
chr7_2	41900000	42000000	100
chr7_2	42100000	42200000	100
chr7_2	44800000	44900000	100
chr7_3	600000	1700000	1100
chr7_3	0	500000	500
chr7_3	43700000	44200000	500
chr7_3	1800000	2100000	300
chr7_3	37800000	38000000	200
chr7_3	42400000	42600000	200
chr7_3	44300000	44500000	200
chr7_3	2200000	2300000	100
chr7_3	40900000	41000000	100
chr7_3	41100000	41200000	100
chr7_3	41300000	41400000	100
chr7_3	41900000	42000000	100
chr7_3	43400000	43500000	100
chr7_4	50800000	51600000	800
chr7_4	2200000	2900000	700
chr7_4	49800000	50500000	700
chr7_4	47100000	47700000	600
chr7_4	41300000	41800000	500
chr7_4	1800000	2100000	300
chr7_4	42400000	42600000	200
chr7_4	44900000	45100000	200
chr7_4	47800000	48000000	200
chr7_4	39300000	39400000	100
chr7_4	41100000	41200000	100
chr7_4	45200000	45300000	100
chr7_4	49500000	49600000	100
chr7_4	50600000	50700000	100
chr7_4	51700000	51800000	100
chr8_1	41200000	42200000	1000
chr8_1	57600000	58468454	868.454
chr8_1	42400000	43000000	600
chr8_1	2500000	2800000	300
chr8_1	57100000	57400000	300
chr8_1	40900000	41100000	200
chr8_1	2200000	2300000	100
chr8_1	2900000	3000000	100
chr8_1	3100000	3200000	100
chr8_1	55200000	55300000	100
chr8_1	55400000	55500000	100
chr8_1	55600000	55700000	100
chr8_1	56000000	56100000	100
chr8_1	56500000	56600000	100
chr8_2	47700000	49000000	1300
chr8_2	49100000	49900000	800
chr8_2	40300000	40900000	600
chr8_2	50100000	50700000	600
chr8_2	1900000	2400000	500
chr8_2	41400000	41900000	500
chr8_2	46600000	47100000	500
chr8_2	47200000	47600000	400
chr8_2	57600000	58000000	400
chr8_2	2500000	2800000	300
chr8_2	41000000	41300000	300
chr8_2	1000000	1100000	100
chr8_2	34700000	34800000	100
chr8_2	50900000	51000000	100
chr8_2	58400000	58500000	100
chr8_2	58800000	58900000	100
chr8_3	19800000	22700000	2900
chr8_3	31800000	34100000	2300
chr8_3	36500000	38700000	2200
chr8_3	26800000	28800000	2000
chr8_3	9900000	11800000	1900
chr8_3	12800000	14400000	1600
chr8_3	14500000	16000000	1500
chr8_3	16200000	17700000	1500
chr8_3	38800000	40200000	1400
chr8_3	30400000	31700000	1300
chr8_3	18700000	19700000	1000
chr8_3	41600000	42600000	1000
chr8_3	23100000	24000000	900
chr8_3	29600000	30300000	700
chr8_3	34800000	35500000	700
chr8_3	44200000	44900000	700
chr8_3	12200000	12700000	500
chr8_3	29000000	29500000	500
chr8_3	34200000	34700000	500
chr8_3	42700000	43200000	500
chr8_3	9400000	9800000	400
chr8_3	17800000	18200000	400
chr8_3	25400000	25800000	400
chr8_3	26300000	26700000	400
chr8_3	35600000	36000000	400
chr8_3	43300000	43700000	400
chr8_3	18300000	18600000	300
chr8_3	24400000	24700000	300
chr8_3	24900000	25200000	300
chr8_3	25900000	26200000	300
chr8_3	43800000	44100000	300
chr8_3	45000000	45300000	300
chr8_3	11900000	12100000	200
chr8_3	36100000	36300000	200
chr8_3	54700000	54900000	200
chr8_3	22900000	23000000	100
chr8_3	24200000	24300000	100
chr8_3	54500000	54600000	100
chr8_3	56700000	56800000	100
chr8_3	57300000	57400000	100
chr8_3	58200000	58300000	100
chr8_3	58700000	58800000	100
chr8_4	31500000	37400000	5900
chr8_4	16000000	18800000	2800
chr8_4	13500000	15900000	2400
chr8_4	22600000	24500000	1900
chr8_4	10200000	11900000	1700
chr8_4	19700000	21200000	1500
chr8_4	12100000	13400000	1300
chr8_4	47600000	48900000	1300
chr8_4	21300000	22500000	1200
chr8_4	24600000	25800000	1200
chr8_4	26300000	27500000	1200
chr8_4	30100000	31300000	1200
chr8_4	9200000	10100000	900
chr8_4	57800000	58680666	880.666
chr8_4	28500000	29300000	800
chr8_4	39600000	40400000	800
chr8_4	18900000	19600000	700
chr8_4	27600000	28300000	700
chr8_4	40600000	41300000	700
chr8_4	29400000	30000000	600
chr8_4	45900000	46500000	600
chr8_4	37500000	38000000	500
chr8_4	49400000	49900000	500
chr8_4	38300000	38700000	400
chr8_4	42100000	42500000	400
chr8_4	43700000	44100000	400
chr8_4	47000000	47400000	400
chr8_4	1100000	1400000	300
chr8_4	25900000	26200000	300
chr8_4	41700000	42000000	300
chr8_4	42600000	42900000	300
chr8_4	44600000	44900000	300
chr8_4	46600000	46900000	300
chr8_4	56400000	56700000	300
chr8_4	38900000	39100000	200
chr8_4	39300000	39500000	200
chr8_4	43000000	43200000	200
chr8_4	44200000	44400000	200
chr8_4	45600000	45800000	200
chr8_4	55800000	56000000	200
chr8_4	38100000	38200000	100
chr8_4	41500000	41600000	100
chr8_4	49200000	49300000	100
chr8_4	53800000	53900000	100
chr8_4	55600000	55700000	100
chr8_4	56100000	56200000	100
chr9_1	70500000	71100000	600
chr9_1	10900000	11400000	500
chr9_1	69300000	69800000	500
chr9_1	69900000	70400000	500
chr9_1	2300000	2700000	400
chr9_1	68800000	69200000	400
chr9_1	3900000	4200000	300
chr9_1	57400000	57700000	300
chr9_1	68400000	68700000	300
chr9_1	2000000	2200000	200
chr9_1	12000000	12200000	200
chr9_1	12400000	12600000	200
chr9_1	3100000	3200000	100
chr9_1	8000000	8100000	100
chr9_1	16000000	16100000	100
chr9_1	16400000	16500000	100
chr9_1	25900000	26000000	100
chr9_1	49000000	49100000	100
chr9_1	55900000	56000000	100
chr9_1	56200000	56300000	100
chr9_1	71400000	71500000	100
chr9_1	71700000	71800000	100
chr9_2	63400000	64400000	1000
chr9_2	78300000	78900000	600
chr9_2	15400000	15800000	400
chr9_2	38600000	39000000	400
chr9_2	41300000	41700000	400
chr9_2	9000000	9300000	300
chr9_2	14500000	14800000	300
chr9_2	42000000	42300000	300
chr9_2	0	200000	200
chr9_2	300000	500000	200
chr9_2	1400000	1600000	200
chr9_2	13200000	13400000	200
chr9_2	13500000	13700000	200
chr9_2	39100000	39300000	200
chr9_2	40000000	40200000	200
chr9_2	40300000	40500000	200
chr9_2	43100000	43300000	200
chr9_2	700000	800000	100
chr9_2	5000000	5100000	100
chr9_2	9600000	9700000	100
chr9_2	13000000	13100000	100
chr9_2	21400000	21500000	100
chr9_2	21600000	21700000	100
chr9_2	36200000	36300000	100
chr9_2	36400000	36500000	100
chr9_2	36900000	37000000	100
chr9_2	37100000	37200000	100
chr9_2	37500000	37600000	100
chr9_2	37900000	38000000	100
chr9_2	38200000	38300000	100
chr9_2	39400000	39500000	100
chr9_2	39800000	39900000	100
chr9_2	41800000	41900000	100
chr9_2	42900000	43000000	100
chr9_2	44100000	44200000	100
chr9_2	51100000	51200000	100
chr9_2	56500000	56600000	100
chr9_2	57500000	57600000	100
chr9_2	58200000	58300000	100
chr9_2	58500000	58600000	100
chr9_2	61300000	61400000	100
chr9_2	61700000	61800000	100
chr9_2	62000000	62100000	100
chr9_2	63200000	63300000	100
chr9_2	72800000	72900000	100
chr9_2	76600000	76700000	100
chr9_2	81000000	81100000	100
chr9_3	53700000	54600000	900
chr9_3	7900000	8700000	800
chr9_3	52800000	53600000	800
chr9_3	5700000	6300000	600
chr9_3	52100000	52700000	600
chr9_3	5000000	5500000	500
chr9_3	200000	600000	400
chr9_3	55000000	55300000	300
chr9_3	56000000	56300000	300
chr9_3	1100000	1300000	200
chr9_3	51600000	51800000	200
chr9_3	54700000	54900000	200
chr9_3	55700000	55900000	200
chr9_3	6400000	6500000	100
chr9_3	6600000	6700000	100
chr9_3	7700000	7800000	100
chr9_3	25600000	25700000	100
chr9_3	55400000	55500000	100
chr9_4	7500000	8700000	1200
chr9_4	56900000	58100000	1200
chr9_4	5600000	6500000	900
chr9_4	0	500000	500
chr9_4	5000000	5200000	200
chr9_4	28200000	28400000	200
chr9_4	5300000	5400000	100
chr9_4	27400000	27500000	100
chr9_4	37600000	37700000	100
chr9_4	38200000	38300000	100
chr9_4	54300000	54400000	100
chr9_4	58200000	58300000	100
Total			818247
