# Supplementary material for: Resequencing Elucidates the Genetic Mechanism Underlying Elite Early-Maturing Potato Parent Kexin23
Source: Research Square preprint supplement (doi:10.21203/rs.3.rs-7582259/v1), 2025-12-02
Supplement: Supplementary file 31 [file Table S9. IBS matrix of genetic similarity.xls]

## Sheet: Sheet1
ibs_matrix	L2019100_10 BE200158-13 x KX23 L201558_17 L201598_2 L201603_1 L201606_24 L201609_6 L201711_6 L2018112_3 L2018112_9 L201830_12 L201903_35 L2019102_2 L201982_6 LS16 LS18 LS19 LS20 LS22 LS24 LS28 LS302019100_10	Aula	BE200158-13 x KX23	KX23	KX25	KX4	L201558_17	L201598_2	L201603_1	L201606_24	L201609_6	L201711_6	L2018112_3	L2018112_9	L201830_12	L201903_35	L2019102_2	L201982_6	LS16	LS18	LS19	LS20	LS22	LS24	LS28	LS30
L2019100_10 BE200158-13 x KX23 L201558_17 L201598_2 L201603_1 L201606_24 L201609_6 L201711_6 L2018112_3 L2018112_9 L201830_12 L201903_35 L2019102_2 L201982_6 LS16 LS18 LS19 LS20 LS22 LS24 LS28 LS302019100_10	1	0.729	0.706343	0.780254	0.768249	0.780786	0.686764	0.771648	0.706345	0.739272	0.754404	0.727701	0.75226	0.789401	0.75927	0.722577	0.699597	0.752871	0.758074	0.768229	0.736712	0.742135	0.734632	0.788525	0.736841	0.777993
Aula	0.729	1	0.842976	0.791266	0.802279	0.814486	0.800563	0.800476	0.782798	0.808395	0.779626	0.78189	0.76944	0.829738	0.712819	0.798078	0.823534	0.795238	0.851492	0.782615	0.787262	0.80033	0.804584	0.787225	0.816146	0.727957
BE200158-13 x KX23	0.706343	0.842976	1	0.748296	0.78136	0.78731	0.773745	0.774209	0.791011	0.783442	0.773663	0.776681	0.749969	0.779482	0.757432	0.79957	0.854663	0.754851	0.805607	0.732787	0.794687	0.825626	0.779397	0.756655	0.787807	0.74425
KX23	0.780254	0.791266	0.748296	1	0.77938	0.790263	0.725695	0.772165	0.745948	0.771986	0.771157	0.772384	0.788188	0.764765	0.736508	0.775258	0.737583	0.761945	0.80283	0.793624	0.782949	0.763063	0.774595	0.767487	0.787102	0.744088
KX25	0.768249	0.802279	0.78136	0.77938	1	0.835507	0.764852	0.806064	0.744481	0.821706	0.796651	0.785272	0.761526	0.766491	0.757577	0.784985	0.752803	0.787244	0.800792	0.766477	0.791943	0.762921	0.838011	0.761049	0.780939	0.743772
KX4	0.780786	0.814486	0.78731	0.790263	0.835507	1	0.76844	0.786935	0.763286	0.822059	0.784561	0.773581	0.748661	0.784484	0.752382	0.780414	0.772689	0.778983	0.819551	0.76107	0.779398	0.805044	0.82221	0.774742	0.800823	0.761837
L201558_17	0.686764	0.800563	0.773745	0.725695	0.764852	0.76844	1	0.761571	0.718384	0.755987	0.708944	0.772403	0.7124	0.765871	0.723481	0.793362	0.744361	0.789168	0.765312	0.752141	0.796293	0.761372	0.774466	0.736363	0.73966	0.75266
L201598_2	0.771648	0.800476	0.774209	0.772165	0.806064	0.786935	0.761571	1	0.73111	0.769887	0.748208	0.774042	0.752226	0.789073	0.767677	0.798613	0.733705	0.822543	0.77027	0.810316	0.779343	0.801138	0.765696	0.768046	0.735264	0.756395
L201603_1	0.706345	0.782798	0.791011	0.745948	0.744481	0.763286	0.718384	0.73111	1	0.792993	0.859274	0.737178	0.748428	0.730896	0.75063	0.757327	0.802976	0.702788	0.746425	0.732871	0.750257	0.786898	0.763667	0.722204	0.782481	0.721196
L201606_24	0.739272	0.808395	0.783442	0.771986	0.821706	0.822059	0.755987	0.769887	0.792993	1	0.835512	0.755133	0.786181	0.75327	0.731138	0.76976	0.772244	0.746964	0.8198	0.743462	0.757591	0.763386	0.831107	0.767319	0.777495	0.719643
L201609_6	0.754404	0.779626	0.773663	0.771157	0.796651	0.784561	0.708944	0.748208	0.859274	0.835512	1	0.739908	0.749032	0.737314	0.746079	0.761567	0.760239	0.722863	0.774905	0.748541	0.756574	0.763455	0.795693	0.759242	0.813003	0.734181
L201711_6	0.727701	0.78189	0.776681	0.772384	0.785272	0.773581	0.772403	0.774042	0.737178	0.755133	0.739908	1	0.723743	0.740824	0.774546	0.859594	0.753771	0.784474	0.749559	0.757958	0.852396	0.771456	0.776767	0.705947	0.727411	0.776952
L2018112_3	0.75226	0.76944	0.749969	0.788188	0.761526	0.748661	0.7124	0.752226	0.748428	0.786181	0.749032	0.723743	1	0.757112	0.750459	0.719571	0.746893	0.739545	0.759685	0.745025	0.723804	0.764962	0.785275	0.745003	0.720399	0.711516
L2018112_9	0.789401	0.829738	0.779482	0.764765	0.766491	0.784484	0.765871	0.789073	0.730896	0.75327	0.737314	0.740824	0.757112	1	0.734392	0.764558	0.757006	0.776999	0.807629	0.763636	0.765201	0.789403	0.739394	0.781497	0.775768	0.755505
L201830_12	0.75927	0.712819	0.757432	0.736508	0.757577	0.752382	0.723481	0.767677	0.75063	0.731138	0.746079	0.774546	0.750459	0.734392	1	0.773721	0.740794	0.739924	0.706673	0.772838	0.784072	0.795211	0.749817	0.735425	0.718681	0.758809
L201903_35	0.722577	0.798078	0.79957	0.775258	0.784985	0.780414	0.793362	0.798613	0.757327	0.76976	0.761567	0.859594	0.719571	0.764558	0.773721	1	0.762196	0.818548	0.766425	0.757545	0.878764	0.787012	0.774158	0.71556	0.745235	0.79211
L2019102_2	0.699597	0.823534	0.854663	0.737583	0.752803	0.772689	0.744361	0.733705	0.802976	0.772244	0.760239	0.753771	0.746893	0.757006	0.740794	0.762196	1	0.709999	0.781695	0.717058	0.759709	0.800937	0.77113	0.759926	0.812508	0.717406
L201982_6	0.752871	0.795238	0.754851	0.761945	0.787244	0.778983	0.789168	0.822543	0.702788	0.746964	0.722863	0.784474	0.739545	0.776999	0.739924	0.818548	0.709999	1	0.757881	0.780525	0.803431	0.764774	0.764729	0.752979	0.723439	0.782741
LS16	0.758074	0.851492	0.805607	0.80283	0.800792	0.819551	0.765312	0.77027	0.746425	0.8198	0.774905	0.749559	0.759685	0.807629	0.706673	0.766425	0.781695	0.757881	1	0.7421	0.763892	0.776435	0.799553	0.830338	0.82029	0.710039
LS18	0.768229	0.782615	0.732787	0.793624	0.766477	0.76107	0.752141	0.810316	0.732871	0.743462	0.748541	0.757958	0.745025	0.763636	0.772838	0.757545	0.717058	0.780525	0.7421	1	0.752244	0.760265	0.760083	0.754026	0.758251	0.743748
LS19	0.736712	0.787262	0.794687	0.782949	0.791943	0.779398	0.796293	0.779343	0.750257	0.757591	0.756574	0.852396	0.723804	0.765201	0.784072	0.878764	0.759709	0.803431	0.763892	0.752244	1	0.785839	0.783627	0.72032	0.741982	0.776797
LS20	0.742135	0.80033	0.825626	0.763063	0.762921	0.805044	0.761372	0.801138	0.786898	0.763386	0.763455	0.771456	0.764962	0.789403	0.795211	0.787012	0.800937	0.764774	0.776435	0.760265	0.785839	1	0.766694	0.760499	0.75853	0.755071
LS22	0.734632	0.804584	0.779397	0.774595	0.838011	0.82221	0.774466	0.765696	0.763667	0.831107	0.795693	0.776767	0.785275	0.739394	0.749817	0.774158	0.77113	0.764729	0.799553	0.760083	0.783627	0.766694	1	0.770355	0.782069	0.734896
LS24	0.788525	0.787225	0.756655	0.767487	0.761049	0.774742	0.736363	0.768046	0.722204	0.767319	0.759242	0.705947	0.745003	0.781497	0.735425	0.71556	0.759926	0.752979	0.830338	0.754026	0.72032	0.760499	0.770355	1	0.787484	0.720532
LS28	0.736841	0.816146	0.787807	0.787102	0.780939	0.800823	0.73966	0.735264	0.782481	0.777495	0.813003	0.727411	0.720399	0.775768	0.718681	0.745235	0.812508	0.723439	0.82029	0.758251	0.741982	0.75853	0.782069	0.787484	1	0.728203
LS30	0.777993	0.727957	0.74425	0.744088	0.743772	0.761837	0.75266	0.756395	0.721196	0.719643	0.734181	0.776952	0.711516	0.755505	0.758809	0.79211	0.717406	0.782741	0.710039	0.743748	0.776797	0.755071	0.734896	0.720532	0.728203	1
